# Supplementary material
Source: PubMed Central journal article supplement (PMC2945287)
Supplement: NIHMS231612-supplement.pdf [file NIHMS231612-supplement.pdf]

## **Supporting Information**

### **Antifolate-induced depletion of intracellular glycine and purines inhibits thymineless death in *E. coli***

Yun Kyung Kwon, Meytal Budin Higgins and Joshua D. Rabinowitz

Department of Chemistry and Lewis-Sigler Institute for Integrative Genomics, Carl Icahn Laboratory,  
Washington Road, Princeton University, Princeton, New Jersey 08544, United States of America

Corresponding author:

Joshua D. Rabinowitz, M.D., Ph.D.

Lewis-Sigler Institute for Integrative Genomics

241 Carl Icahn Laboratory

Princeton University

Princeton, NJ 08544

Telephone: (609) 258-8985

Fax: (609) 258-3565

Email: [joshr@princeton.edu](mailto:joshr@princeton.edu)

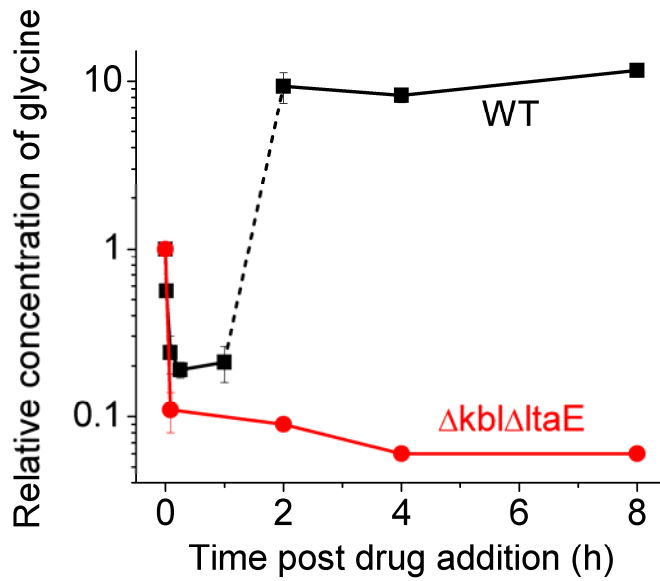

**Supplementary Figure 1.** Cells are able to convert threonine to generate glycine in the presence of a purine source. Unlike wildtype *E. coli*, intracellular glycine levels do not accumulate in  $\Delta kbl\Delta taE$  mutant *E. coli* treated with trimethoprim while growing in inosine-supplemented minimal media. Error bars show  $\pm 1$  SE of the mean ( $n \geq 2$  independent experiments). WT, wildtype.

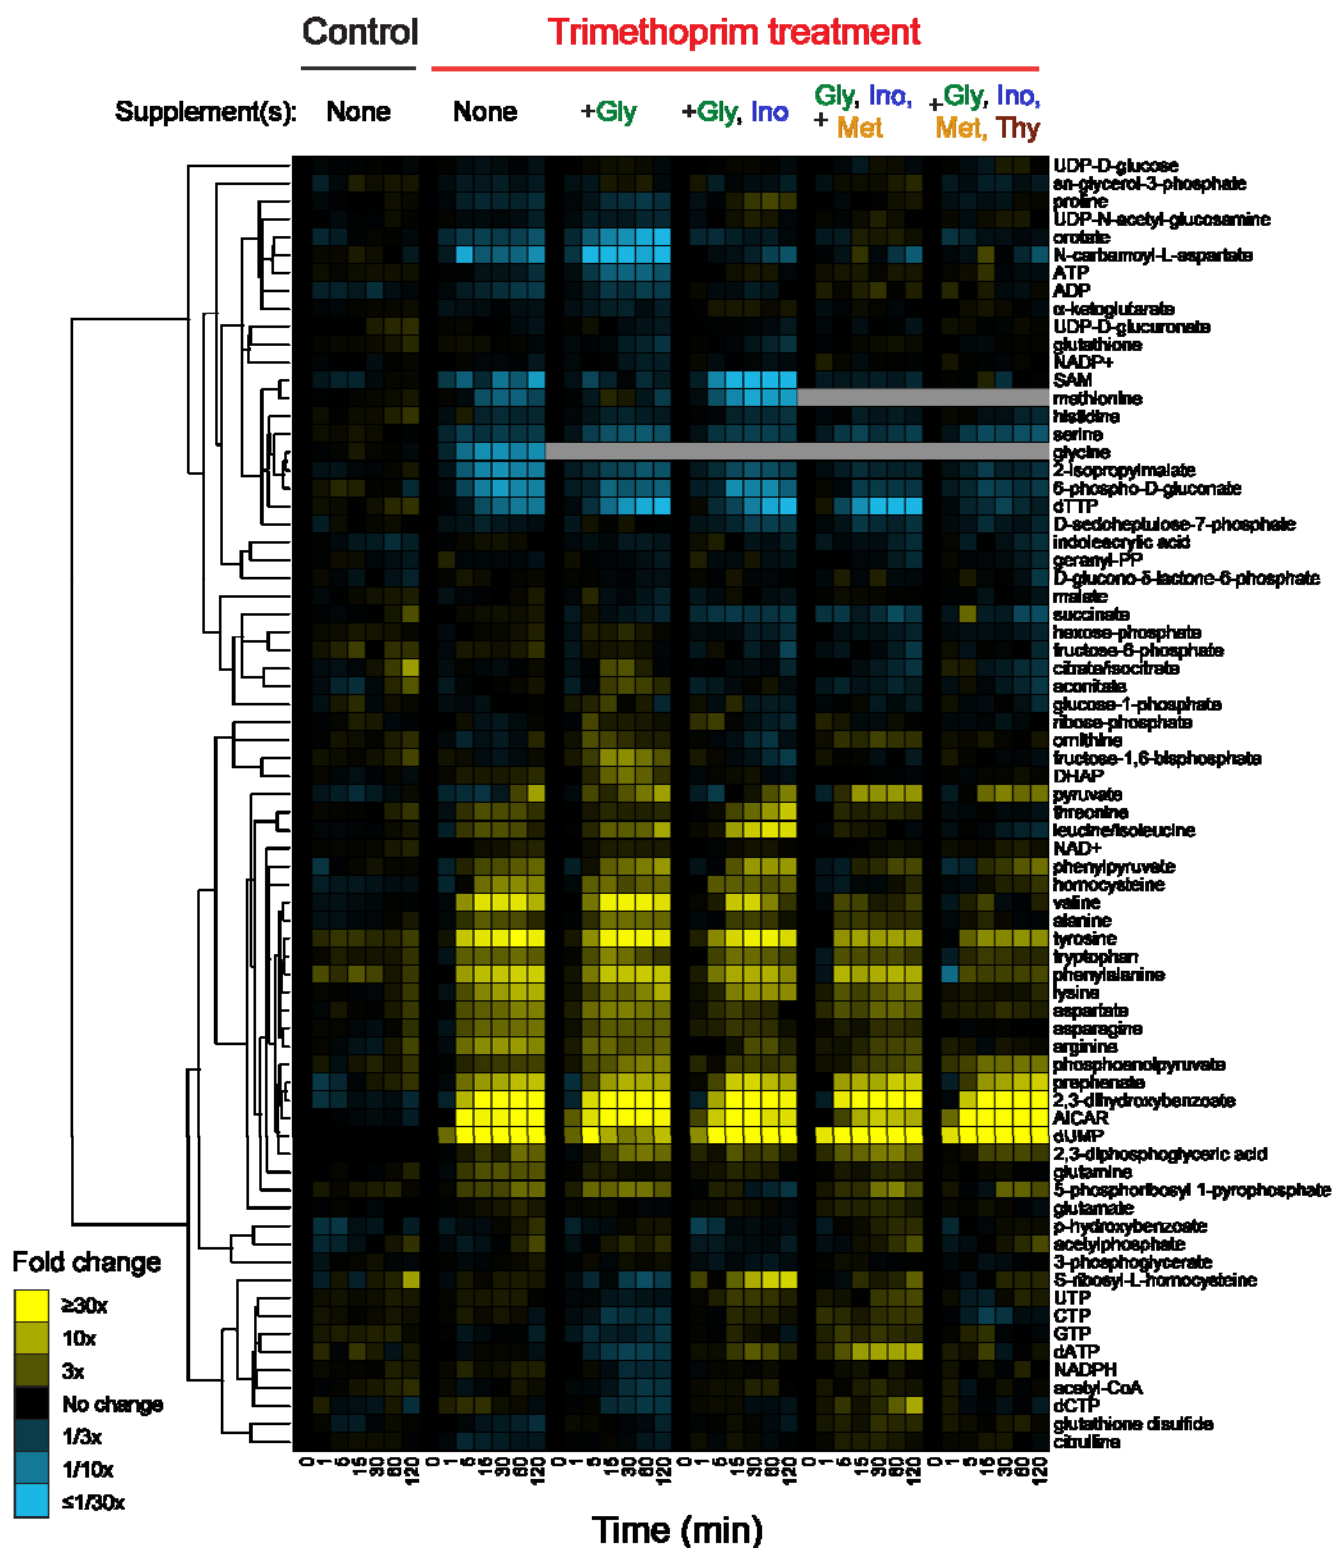

**Supplementary Figure 2.** Profiles of 72 intracellular metabolites in wildtype *E. coli* treated with trimethoprim while growing in minimal media containing indicated supplements. Relative levels are expressed as the log ratio of the normalized signal intensity in drug treated cells at each time point to the normalized signal intensity in the drug-free time 0 sample ( $n \geq 2$  independent experiments). In cases of exogenous glycine and/ or methionine addition, glycine and methionine levels are not reported because intracellular pools could not be differentiated from extracellular pools.

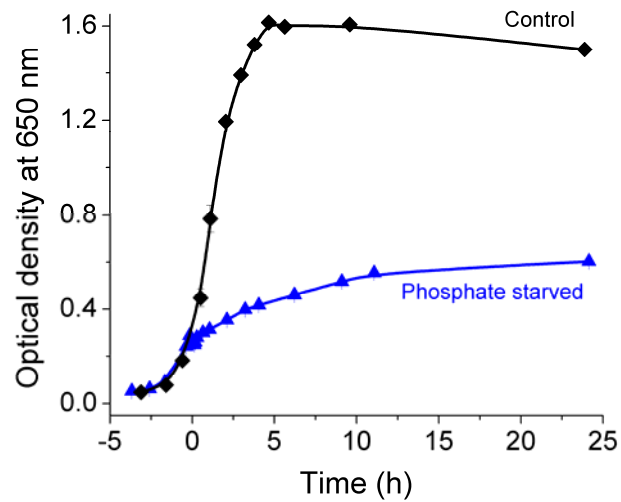

**Supplementary Figure 3.** Phosphate starvation halts *E. coli* growth. Growth curves of control cells were done in MOPS minimal media with 0.5 mM K<sub>2</sub>HPO<sub>4</sub>. For phosphate starvation, cells were grown in MOPS minimal media with 0.5 mM K<sub>2</sub>HPO<sub>4</sub> to A<sub>650</sub> ~ 0.3 at 37°C and centrifuged for 4 min at 5000 g at room temperature. Media was then aspirated, and then cells were resuspended in MOPS minimal media with 0 mM K<sub>2</sub>HPO<sub>4</sub>. Time 0 is when phosphate starved cells were switched to MOPS minimal media without K<sub>2</sub>HPO<sub>4</sub> ( $n = 3$ ).

**Supplementary Table 1.** Data used to generate heat maps in this manuscript. Raw ion counts are shown for every measured metabolite. Relative concentrations were determined by normalizing raw ion counts to those at time 0 and normalizing by optical density of cells. For raw ion counts, values less than 100 were set to a floor of 100.

| <b>Control (no trimethoprim) replicate 1 raw data</b> |         |         |         |         |         |         |          |
|-------------------------------------------------------|---------|---------|---------|---------|---------|---------|----------|
| Time (min)                                            | 0       | 1       | 5       | 15      | 30      | 60      | 120      |
| Optical density                                       | 0.470   | 0.470   | 0.499   | 0.528   | 0.586   | 0.703   | 0.936    |
| 2,3-dihydroxybenzoate                                 | 1151    | 420     | 242     | 610     | 1037    | 1500    | 885      |
| 2-Isopropylmalic acid                                 | 65822   | 47634   | 46735   | 62339   | 64983   | 102819  | 185334   |
| 3-phosphoglycerate                                    | 3500    | 3202    | 4771    | 5119    | 5906    | 4668    | 7389     |
| 5-phosphoribosyl 1-pyrophosphate                      | 1694    | 2574    | 2125    | 3298    | 3805    | 5532    | 4310     |
| 6-phospho-D-gluconate                                 | 2783    | 4846    | 7029    | 5944    | 4286    | 5107    | 2868     |
| acetyl-CoA-nega                                       | 8674    | 6514    | 9013    | 9140    | 11028   | 16454   | 28229    |
| acetylphosphate                                       | 5293    | 2714    | 2603    | 4672    | 7199    | 10735   | 22670    |
| aconitate                                             | 1415    | 820     | 414     | 506     | 1255    | 3815    | 8809     |
| ADP-D-glucose                                         | 321     | 380     | 100     | 100     | 126     | 713     | 1897     |
| ADP-nega                                              | 1828    | 852     | 1157    | 1372    | 982     | 2226    | 2829     |
| a-ketoglutarate                                       | 4652    | 5506    | 4800    | 6323    | 7063    | 7469    | 12218    |
| alanine-CBZ                                           | 170270  | 137711  | 142030  | 173951  | 198793  | 279994  | 498760   |
| alanine-CBZ-C13N15-IS                                 | 304369  | 352217  | 334544  | 377739  | 394387  | 330117  | 369047   |
| AICAR                                                 | 100     | 100     | 100     | 100     | 100     | 100     | 100      |
| arginine-CBZ                                          | 3563    | 3889    | 3236    | 2526    | 2919    | 6226    | 14406    |
| asparagine-CBZ                                        | 19154   | 22984   | 23344   | 18915   | 19065   | 31583   | 77487    |
| aspartate-CBZ                                         | 86721   | 77158   | 121558  | 105779  | 104469  | 188964  | 341140   |
| ATP-nega                                              | 9779    | 12800   | 12236   | 15378   | 14818   | 20088   | 25931    |
| citrate                                               | 2758    | 2447    | 2744    | 2691    | 2335    | 7863    | 45709    |
| citrate/isocitrate                                    | 25134   | 16450   | 20052   | 26693   | 37146   | 100158  | 422864   |
| citrulline-CBZ                                        | 10028   | 11299   | 14237   | 16847   | 17589   | 19921   | 20584    |
| coenzyme A-nega                                       | 100     | 204     | 587     | 830     | 868     | 1243    | 2714     |
| CTP/UTP-nega-IS                                       | 7007    | 7776    | 9884    | 9055    | 10399   | 11114   | 11894    |
| CTP-nega                                              | 2847    | 3997    | 4065    | 3316    | 4237    | 5669    | 7507     |
| dATP-nega                                             | 132     | 100     | 125     | 133     | 100     | 101     | 282      |
| dCTP-nega                                             | 100     | 100     | 100     | 100     | 100     | 341     | 101      |
| D-glucono- $\delta$ -lactone-6-phosphate              | 966     | 1095    | 1001    | 514     | 1437    | 1149    | 784      |
| dihydroxy-acetone phosphate                           | 3393    | 3183    | 3409    | 2707    | 3994    | 5409    | 5317     |
| D-sedoheptulose-7-phosphate                           | 1704    | 902     | 2135    | 1971    | 2093    | 3188    | 4191     |
| dTTP-nega                                             | 1923    | 2611    | 2625    | 2385    | 3318    | 6262    | 8842     |
| fructose-1,6-bisphosphate                             | 19279   | 26752   | 24076   | 25387   | 30796   | 52379   | 100971   |
| fructose-6-phosphate                                  | 507     | 954     | 1150    | 1568    | 665     | 2069    | 2542     |
| geranyl-PP                                            | 703     | 511     | 848     | 962     | 943     | 797     | 1182     |
| glucose-1-phosphate                                   | 677     | 389     | 589     | 1299    | 852     | 794     | 881      |
| glutamate-CBZ                                         | 5652096 | 5834149 | 6677658 | 7040490 | 6799150 | 9519749 | 11634733 |
| glutamate-CBZ-C13N15-IS                               | 100561  | 100795  | 97570   | 103761  | 101655  | 76775   | 68463    |
| glutamine-CBZ                                         | 220107  | 256322  | 297370  | 281060  | 294716  | 420108  | 789820   |
| glutathione disulfide-nega                            | 11721   | 15845   | 7885    | 7284    | 17013   | 24854   | 28146    |
| glutathione-nega                                      | 58929   | 54157   | 71089   | 69856   | 76623   | 99745   | 190878   |
| glycine-CBZ                                           | 21537   | 21116   | 26188   | 34641   | 28847   | 34289   | 36335    |
| GTP-nega                                              | 1979    | 3559    | 3585    | 3901    | 4797    | 6405    | 5654     |
| hexose-phosphate                                      | 7850    | 9903    | 9893    | 11525   | 12498   | 14744   | 16429    |
| histidine-CBZ                                         | 4539    | 5391    | 4579    | 6575    | 6343    | 10205   | 17402    |
| homocysteine-MMTS                                     | 11244   | 6836    | 8021    | 8222    | 9527    | 14023   | 17411    |
| Indoleacrylic acid                                    | 1991    | 2505    | 1969    | 1483    | 1400    | 1229    | 2358     |
| isocitrate                                            | 100     | 100     | 100     | 100     | 100     | 100     | 447      |

|                               |        |        |        |        |        |        |        |
|-------------------------------|--------|--------|--------|--------|--------|--------|--------|
| leucine/isoleucine-CBZ        | 32323  | 28569  | 30448  | 32891  | 36620  | 52256  | 84798  |
| lysine-CBZ                    | 105084 | 113280 | 118906 | 117772 | 127197 | 220666 | 429518 |
| malate                        | 24764  | 21126  | 26961  | 32545  | 41227  | 52555  | 78188  |
| methionine-CBZ                | 16811  | 16773  | 18304  | 21057  | 25500  | 29739  | 45521  |
| NAD+_nega                     | 27662  | 25388  | 24139  | 25271  | 31878  | 50109  | 69828  |
| NADP+_nega                    | 6340   | 5542   | 5420   | 6081   | 5392   | 8106   | 13874  |
| NADPH_nega                    | 1997   | 2423   | 2284   | 2593   | 2388   | 3894   | 5316   |
| N-Carbamoyl-L-aspartate       | 4043   | 4825   | 4923   | 7729   | 7125   | 6869   | 6135   |
| ornithine-CBZ                 | 7835   | 8100   | 12914  | 12789  | 11912  | 19348  | 30016  |
| orotate                       | 11430  | 5459   | 8063   | 13541  | 17904  | 21032  | 19133  |
| p-aminobenzoate               | 212    | 100    | 100    | 100    | 100    | 100    | 100    |
| pantothenate                  | 100    | 100    | 151    | 100    | 100    | 188    | 1714   |
| phenylalanine-CBZ             | 243    | 673    | 419    | 684    | 720    | 310    | 768    |
| phenylpyruvate                | 277    | 161    | 418    | 528    | 772    | 504    | 810    |
| phosphoenolpyruvate           | 216    | 474    | 164    | 417    | 580    | 527    | 1352   |
| p-hydroxybenzoate             | 903    | 246    | 390    | 1014   | 923    | 1476   | 1347   |
| prephenate                    | 256    | 100    | 100    | 398    | 687    | 775    | 976    |
| proline-CBZ                   | 50519  | 40880  | 53094  | 58425  | 62121  | 89358  | 110731 |
| pyruvate                      | 329    | 221    | 141    | 182    | 182    | 272    | 853    |
| ribose-phosphate              | 1459   | 1252   | 1461   | 1867   | 2158   | 2105   | 2297   |
| S-adenosyl-L-methionine - POS | 1189   | 750    | 842    | 1370   | 1391   | 2392   | 2355   |
| serine-CBZ                    | 13809  | 19917  | 17432  | 22641  | 22129  | 21980  | 28085  |
| shikimate-3-phosphate         | 2738   | 1700   | 1371   | 1542   | 1517   | 1571   | 1849   |
| sn-glycerol-3-phosphate       | 899    | 524    | 744    | 951    | 1423   | 1357   | 2587   |
| S-ribosyl-L-homocysteine-nega | 321    | 207    | 708    | 113    | 528    | 832    | 4919   |
| succinate C12                 | 1157   | 992    | 922    | 1025   | 1412   | 1724   | 7410   |
| threonine-CBZ                 | 25330  | 30433  | 31166  | 30907  | 31993  | 58977  | 103402 |
| trptophan-CBZ                 | 1921   | 1688   | 2609   | 2496   | 2994   | 3170   | 7229   |
| tyrosine-CBZ                  | 2318   | 4330   | 4571   | 5783   | 4804   | 5492   | 8755   |
| UDP-D-glucose                 | 109899 | 93098  | 116343 | 117598 | 146269 | 178159 | 203116 |
| UDP-D-glucuronate             | 18142  | 13844  | 18151  | 18365  | 27399  | 43216  | 61966  |
| UDP-N-acetyl-glucosamine      | 22882  | 25745  | 22411  | 24938  | 27287  | 45062  | 53028  |
| UDP-nega                      | 532    | 100    | 692    | 205    | 555    | 1090   | 1308   |
| UTP-nega                      | 7259   | 8756   | 8910   | 9197   | 10189  | 14855  | 18422  |
| valine-CBZ                    | 43268  | 37021  | 37127  | 44831  | 52698  | 69156  | 80718  |

**Control (no trimethoprim) replicate 2 raw data**

| Time (min)                               | 0       | 1       | 5       | 15      | 30      | 60      | 120      |
|------------------------------------------|---------|---------|---------|---------|---------|---------|----------|
| Optical density                          | 0.470   | 0.470   | 0.499   | 0.528   | 0.586   | 0.703   | 0.936    |
| 2,3-dihydroxybenzoate                    | 1120    | 464     | 886     | 1415    | 918     | 1207    | 1223     |
| 2-Isopropylmalic acid                    | 64456   | 45781   | 48217   | 67940   | 82134   | 109098  | 171036   |
| 3-phosphoglycerate                       | 4408    | 2141    | 3649    | 4294    | 6230    | 6154    | 6351     |
| 5-phosphoribosyl 1-pyrophosphate         | 3613    | 4549    | 3914    | 3686    | 5183    | 5683    | 6608     |
| 6-phospho-D-gluconate                    | 5251    | 4224    | 5715    | 7296    | 5541    | 7229    | 4036     |
| acetyl-CoA-nega                          | 6564    | 7161    | 7875    | 12094   | 14665   | 19110   | 27067    |
| acetylphosphate                          | 5313    | 2199    | 3220    | 4078    | 5717    | 10099   | 18219    |
| aconitate                                | 1301    | 1341    | 1016    | 761     | 1563    | 2957    | 8418     |
| ADP-D-glucose                            | 161     | 100     | 100     | 122     | 139     | 766     | 2036     |
| ADP-nega                                 | 1935    | 1221    | 938     | 1286    | 943     | 2048    | 3723     |
| a-ketoglutarate                          | 5756    | 3681    | 4849    | 6026    | 7133    | 9985    | 11821    |
| alanine-CBZ                              | 158100  | 110404  | 120830  | 142650  | 159472  | 248234  | 405920   |
| alanine-CBZ-C13N15-IS                    | 357841  | 283761  | 316674  | 310848  | 302391  | 311393  | 323050   |
| AICAR                                    | 100     | 100     | 100     | 100     | 100     | 163     | 129      |
| arginine-CBZ                             | 2733    |         | 2561    | 2455    | 2148    | 6241    | 16290    |
| asparagine-CBZ                           | 19388   | 19111   | 21019   | 19043   | 18255   | 29557   | 69363    |
| aspartate-CBZ                            | 71595   | 64169   | 103864  | 79667   | 85477   | 146923  | 333182   |
| ATP-nega                                 | 13483   | 14484   | 14178   | 15419   | 21886   | 23182   | 30841    |
| citrate                                  | 3424    | 3218    | 3467    | 3450    | 5174    | 9647    | 42136    |
| citrate/isocitrate                       | 29373   | 27243   | 23414   | 27516   | 50137   | 78605   | 494951   |
| citrulline-CBZ                           | 12798   | 10687   | 12942   | 13323   | 15844   | 20951   | 21405    |
| coenzyme A-nega                          | 261     | 602     | 330     | 1139    | 1383    | 1949    | 2863     |
| CTP/UTP-nega-IS                          | 8867    | 10259   | 11307   | 9958    | 12555   | 11858   | 13067    |
| CTP-nega                                 | 4337    | 5246    | 4785    | 5138    | 5920    | 8756    | 9096     |
| dATP-nega                                | 100     | 265     | 100     | 370     | 284     | 129     | 337      |
| dCTP-nega                                | 144     | 298     | 100     | 100     | 100     | 107     | 100      |
| D-glucono- $\delta$ -lactone-6-phosphate | 979     | 1125    | 862     | 981     | 1015    | 900     | 1290     |
| dihydroxy-acetone phosphate              | 3401    | 4290    | 3044    | 3005    | 3856    | 5837    | 5500     |
| D-sedoheptulose-7-phosphate              | 2028    | 1274    | 2506    | 2279    | 3094    | 3338    | 2978     |
| dTTP-nega                                | 2931    | 3212    | 3198    | 2851    | 4066    | 5800    | 9617     |
| fructose-1,6-bisphosphate                | 23425   | 26921   | 29543   | 25966   | 35977   | 42884   | 112357   |
| fructose-6-phosphate                     | 873     | 603     | 968     | 1840    | 1002    | 1386    | 2436     |
| geranyl-PP                               | 764     | 851     | 986     | 982     | 628     | 888     | 678      |
| glucose-1-phosphate                      | 616     | 568     | 1280    | 1293    | 545     | 1545    | 1919     |
| glutamate-CBZ                            | 6126956 | 5364036 | 6437701 | 6034474 | 6364152 | 8341125 | 11104074 |
| glutamate-CBZ-C13N15-IS                  | 110336  | 86123   | 97043   | 94438   | 81546   | 73081   | 70670    |
| glutamine-CBZ                            | 274387  | 223235  | 259455  | 260537  | 275447  | 388325  | 725291   |
| glutathione disulfide-nega               | 24002   | 19628   | 15374   | 16861   | 19354   | 32958   | 45094    |
| glutathione-nega                         | 46236   | 55671   | 53510   | 63057   | 73323   | 104046  | 172490   |
| glycine-CBZ                              | 20906   | 19242   | 21868   | 31604   | 28691   | 31761   | 35141    |
| GTP-nega                                 | 4449    | 4288    | 5968    | 5729    | 6715    | 6920    | 7249     |
| hexose-phosphate                         | 7722    | 8016    | 9505    | 12299   | 12917   | 14896   | 17351    |
| histidine-CBZ                            | 3915    |         | 4654    | 4671    | 5994    | 9295    | 16780    |
| homocysteine-MMTS                        | 9473    | 5034    | 6294    | 6733    | 8055    | 10127   | 14316    |
| Indoleacrylic acid                       | 2067    | 1645    | 1630    | 1485    | 1667    | 1405    | 2214     |
| isocitrate                               | 100     | 100     | 100     | 100     | 100     | 100     | 1085     |
| leucine/isoleucine-CBZ                   | 27913   |         | 25118   | 29118   | 33312   | 51755   | 78193    |
| lysine-CBZ                               | 108228  |         | 116052  | 103436  | 108244  | 199306  | 476059   |
| malate                                   | 27412   | 22731   | 27414   | 33455   | 41229   | 54335   | 74416    |
| methionine-CBZ                           | 17013   | 15111   | 16828   | 18849   | 21294   | 29607   | 46417    |
| NAD+ <sub>-nega</sub>                    | 20685   | 25573   | 29339   | 30234   | 33889   | 48135   | 78187    |
| NADP+ <sub>-nega</sub>                   | 7101    | 6657    | 8710    | 9271    | 7686    | 12749   | 15466    |

|                               |        |        |        |        |        |        |        |
|-------------------------------|--------|--------|--------|--------|--------|--------|--------|
| NADPH_nega                    | 2333   | 2535   | 2637   | 2539   | 3299   | 6156   | 6628   |
| N-Carbamoyl-L-aspartate       | 5475   | 5804   | 6461   | 7412   | 7139   | 7202   | 5537   |
| ornithine-CBZ                 | 8914   |        | 9706   | 9591   | 10342  | 17036  | 30681  |
| orotate                       | 15077  | 7033   | 7903   | 13762  | 17266  | 19231  | 25217  |
| p-aminobenzoate               | 199    | 103    | 100    | 100    | 100    | 100    | 100    |
| pantothenate                  | 100    | 100    | 100    | 100    | 100    | 330    | 1736   |
| phenylalanine-CBZ             | 182    |        | 394    | 817    | 600    | 497    | 990    |
| phenylpyruvate                | 780    | 117    | 414    | 434    | 325    | 1155   | 1122   |
| phosphoenolpyruvate           | 596    | 312    | 507    | 610    | 756    | 853    | 989    |
| p-hydroxybenzoate             | 1163   | 606    | 361    | 615    | 772    | 1485   | 929    |
| prephenate                    | 349    | 100    | 215    | 168    | 256    | 565    | 1455   |
| proline-CBZ                   | 48191  | 43685  | 47407  | 52272  | 58264  | 93046  | 111531 |
| pyruvate                      | 335    | 224    | 269    | 145    | 321    | 545    | 656    |
| ribose-phosphate              | 1113   | 1101   | 1458   | 2310   | 2264   | 1228   | 2328   |
| S-adenosyl-L-methionine - POS | 1200   | 999    | 706    | 404    | 2228   | 2988   | 4493   |
| serine-CBZ                    | 16237  | 15441  | 18935  | 21097  | 21563  | 22472  | 27430  |
| shikimate-3-phosphate         | 2073   | 1849   | 1244   | 1536   | 1951   | 1541   | 1504   |
| sn-glycerol-3-phosphate       | 762    | 385    | 743    | 1772   | 1074   | 1912   | 1913   |
| S-ribosyl-L-homocysteine-nega | 211    | 100    | 133    | 184    | 399    | 477    | 4202   |
| succinate C12                 | 1127   | 1157   | 1216   | 1410   | 1462   | 2843   | 5864   |
| threonine-CBZ                 | 26216  | 26367  | 26253  | 29445  | 33458  | 57961  | 105690 |
| trptophan-CBZ                 | 1513   | 2050   | 2724   | 2457   | 2583   | 3597   | 6201   |
| tyrosine-CBZ                  | 2371   | 3713   | 5652   | 4972   | 5322   | 6170   | 13178  |
| UDP-D-glucose                 | 115632 | 108530 | 107536 | 117825 | 146578 | 163277 | 199696 |
| UDP-D-glucuronate             | 16744  | 20485  | 19385  | 20533  | 35945  | 45491  | 66319  |
| UDP-N-acetyl-glucosamine      | 27313  | 21891  | 21032  | 29237  | 31772  | 44167  | 50360  |
| UDP-nega                      | 254    | 603    | 238    | 403    | 343    | 1191   | 1286   |
| UTP-nega                      | 8401   | 10201  | 12368  | 10944  | 13567  | 19370  | 25292  |
| valine-CBZ                    | 50099  | 32507  | 33477  | 38842  | 46181  | 74326  | 91058  |



| <b>Trimethoprim (4 µg/ml) + no supplements replicate 1 raw data</b> |         |         |         |        |         |         |          |
|---------------------------------------------------------------------|---------|---------|---------|--------|---------|---------|----------|
| Time (min)                                                          | 0       | 1       | 5       | 15     | 30      | 60      | 120      |
| Optical density                                                     | 0.540   | 0.540   | 0.550   | 0.560  | 0.580   | 0.620   | 0.700    |
| 1,3-diphosphateglycerate                                            | 2997    | 3315    | 3415    | 4020   | 4931    | 4794    | 8549     |
| 2,3-dihydroxybenzoate                                               | 500     | 261     | 7620    | 19379  | 35377   | 36234   | 70166    |
| 3-phosphoglycerate                                                  | 22221   | 19921   | 20112   | 20050  | 21434   | 23095   | 38456    |
| 5-phosphoribosyl 1-pyrophosphate                                    | 14977   | 17610   | 30232   | 43222  | 35132   | 53347   | 72824    |
| 6-phospho-D-gluconate                                               | 14657   | 19672   | 6635    | 1159   | 944     | 1727    | 1937     |
| acetyl-CoA-nega                                                     | 13161   | 18287   | 11502   | 14895  | 17739   | 22252   | 26720    |
| acetylphosphate                                                     | 17501   | 11607   | 10560   | 16013  | 21469   | 33107   | 69303    |
| aconitate                                                           | 14248   | 11008   | 14593   | 15067  | 15985   | 22198   | 29556    |
| ADP-D-glucose                                                       | 545     | 123     | 238     | 100    | 229     | 100     | 100      |
| ADP-nega                                                            | 2940    | 2611    | 1727    | 1655   | 1340    | 950     | 1654     |
| a-ketoglutarate                                                     | 17480   | 14965   | 17002   | 16938  | 19231   | 15053   | 19595    |
| alanine-CBZ                                                         | 91409   | 73283   | 152856  | 244694 | 183925  | 259687  | 226900   |
| AICAR                                                               | 100     | 100     | 9223    | 1811   | 1921    | 815     | 2970     |
| arginine-CBZ                                                        | 4353    | 2120    | 24466   | 24452  | 34651   | 50981   | 58462    |
| asparagine-CBZ                                                      | 14603   | 10106   | 78996   | 111943 | 130179  | 160082  | 226113   |
| aspartate-CBZ                                                       | 84051   | 62108   | 129983  | 43302  | 151630  | 707947  | 827978   |
| ATP-nega                                                            | 37203   | 53085   | 45024   | 34520  | 37592   | 38546   | 32069    |
| carbamoyl-phosphate                                                 | 752     | 913     | 2542    | 2226   | 1773    | 1853    | 3081     |
| citrate                                                             | 9077    | 10752   | 12004   | 10341  | 8849    | 13890   | 23121    |
| citrate/isocitrate                                                  | 66722   | 83098   | 89333   | 91650  | 94544   | 127085  | 205365   |
| citrulline-CBZ                                                      | 9307    | 5141    | 5798    | 8079   | 9219    | 13281   | 12971    |
| coenzyme A-nega                                                     | 100     | 255     | 647     | 938    | 1060    | 1021    | 1687     |
| CTP-nega                                                            | 9243    | 15567   | 17681   | 20429  | 23849   | 18651   | 14209    |
| dATP-nega                                                           | 18662   | 18471   | 14967   | 20181  | 21006   | 23351   | 19611    |
| dCTP-nega                                                           | 757     | 2503    | 2806    | 3547   | 1744    | 2506    | 2290     |
| dGDP                                                                | 1188    | 1300    | 1041    | 295    | 669     | 721     | 327      |
| D-glucono-δ-lactone-6-phosphate                                     | 1989    | 2611    | 2740    | 2789   | 2942    | 2352    | 2653     |
| D-glyceraldehyde-3-phosphate                                        | 9908    | 13439   | 16075   | 14850  | 13574   | 15559   | 23264    |
| dihydroorotate                                                      | 24451   | 20420   | 16683   | 20846  | 19106   | 19235   | 44225    |
| dihydroxy-acetone phosphate                                         | 8073    | 13891   | 15170   | 14786  | 15750   | 16438   | 20439    |
| D-sedoheptulose-7-phosphate                                         | 6785    | 5239    | 3433    | 2484   | 3002    | 4441    | 6322     |
| dTTP-nega                                                           | 13184   | 15131   | 9618    | 4000   | 1609    | 1247    | 2469     |
| dUMP-nega                                                           | 152     | 599     | 19236   | 34139  | 39459   | 35163   | 24903    |
| fructose-1,6-bisphosphate                                           | 21277   | 31934   | 30639   | 24111  | 21726   | 26606   | 35893    |
| fructose-6-phosphate                                                | 643     | 1135    | 1381    | 1520   | 1512    | 1451    | 2441     |
| fumarate C12                                                        | 2201    | 2152    | 2134    | 1971   | 1885    | 2443    | 3041     |
| geranyl-PP                                                          | 3359    | 5907    | 5852    | 4046   | 4666    | 3915    | 4435     |
| glucono-δ-lactone                                                   | 1619    | 1778    | 2426    | 2504   | 1713    | 2379    | 2149     |
| glucose-1-phosphate                                                 | 2399    | 2243    | 2651    | 2320   | 2533    | 4911    | 6338     |
| glutamate-CBZ                                                       | 4215818 | 2683447 | 2825587 | 921013 | 2346400 | 9294668 | 10116848 |
| glutamine-CBZ                                                       | 127041  | 76934   | 553508  | 912980 | 1000679 | 932723  | 1337928  |
| glutathione disulfide-nega                                          | 13293   | 19706   | 10344   | 9354   | 9781    | 8517    | 12861    |
| glutathione-nega                                                    | 75411   | 93410   | 125592  | 125772 | 108384  | 114434  | 136660   |
| glutathionine-MMTS                                                  | 11777   | 13390   | 9890    | 12553  | 11056   | 12864   | 100      |
| glycerate                                                           | 3937    | 918     | 498     | 341    | 571     | 176     | 275      |
| glycine-CBZ                                                         | 98750   | 71998   | 17788   | 8142   | 6897    | 10163   | 14446    |
| GTP-nega                                                            | 31448   | 37323   | 21256   | 40715  | 47079   | 29580   | 21148    |
| hexose-phosphate                                                    | 9837    | 9948    | 10814   | 13894  | 12376   | 15939   | 22840    |
| histidine-CBZ                                                       | 10889   | 8707    | 9479    | 100    | 511     | 12217   | 9331     |
| homocysteine-MMTS                                                   | 2644    | 100     | 2009    | 465    | 9664    | 14077   | 13479    |
| hydroxyphenylpyruvate                                               | 100     | 100     | 109     | 475    | 760     | 831     | 1489     |

|                               |        |        |        |        |         |         |        |
|-------------------------------|--------|--------|--------|--------|---------|---------|--------|
| isocitrate                    | 771    | 602    | 779    | 596    | 776     | 1554    | 2779   |
| lactate                       | 4770   | 2967   | 2742   | 2825   | 3130    | 3875    | 2577   |
| leucine/isoleucine-CBZ        | 47598  | 23938  | 113102 | 63978  | 126040  | 148096  | 80712  |
| lysine-CBZ                    | 32436  | 14046  | 107586 | 96056  | 220088  | 619334  | 854432 |
| malate                        | 32017  | 31172  | 42410  | 43874  | 42603   | 51128   | 74564  |
| methionine-CBZ                | 7240   | 4281   | 7613   | 7451   | 8276    | 14985   | 18636  |
| myo-inositol                  | 6656   | 3959   | 6401   | 4730   | 5010    | 5496    | 6305   |
| NAD+_nega                     | 23421  | 29977  | 23958  | 39139  | 32346   | 41689   | 58515  |
| NADP+_nega                    | 3513   | 3837   | 4553   | 4063   | 4661    | 4927    | 6122   |
| NADPH_nega                    | 551    | 1096   | 2320   | 1151   | 691     | 1541    | 2223   |
| ornithine-CBZ                 | 2652   | 1873   | 2956   | 3632   | 3248    | 6177    | 18126  |
| orotate                       | 20341  | 10679  | 6544   | 6603   | 6812    | 6442    | 5556   |
| oxaloacetate                  | 4409   | 5383   | 5229   | 5009   | 5432    | 4738    | 4014   |
| pantothenate                  | 100    | 100    | 100    | 493    | 908     | 2297    | 3749   |
| phenylalanine-CBZ             | 255    | 238    | 2321   | 868    | 4287    | 9039    | 10203  |
| phenylpyruvate                | 1140   | 862    | 1902   | 5510   | 4042    | 5300    | 8354   |
| phosphoenolpyruvate           | 953769 | 744292 | 532879 | 709707 | 745701  | 727454  | 598588 |
| p-hydroxybenzoate             | 3378   | 2158   | 2415   | 2992   | 3698    | 4269    | 8870   |
| prephenate                    | 441    | 319    | 2134   | 3470   | 6323    | 8750    | 11456  |
| proline-CBZ                   | 51173  | 54273  | 31920  | 16720  | 26650   | 42331   | 46459  |
| pyruvate                      | 458    | 233    | 128    | 170    | 492     | 2005    | 8032   |
| quinolinate                   | 12459  | 8705   | 7637   | 7815   | 7328    | 6314    | 6087   |
| ribose-phosphate              | 6495   | 8318   | 8311   | 4280   | 4088    | 6021    | 10682  |
| serine-CBZ                    | 22600  | 11386  | 11716  | 22186  | 13648   | 15672   | 21302  |
| shikimate-3-phosphate         | 2942   | 2270   | 3739   | 3516   | 2878    | 3529    | 3456   |
| sn-glycerol-3-phosphate       | 4442   | 4349   | 2668   | 2909   | 3105    | 4294    | 4435   |
| S-ribosyl-L-homocysteine-nega | 581    | 469    | 1521   | 1061   | 1221    | 1558    | 1547   |
| succinate C12                 | 23197  | 23296  | 34298  | 31351  | 29548   | 24305   | 36348  |
| threonine-CBZ                 | 30025  | 18032  | 62417  | 89860  | 97111   | 108918  | 106794 |
| trehalose                     | 8295   | 3189   | 836    | 1434   | 848     | 666     | 2377   |
| trehalose 6-Phosphate         | 569    | 311    | 172    | 145    | 100     | 1012    | 2883   |
| trptophan-CBZ                 | 2025   | 536    | 4033   | 3433   | 4211    | 8152    | 7887   |
| tyrosine-CBZ                  | 2143   | 2722   | 23201  | 20776  | 39780   | 52918   | 46906  |
| UDP-D-glucose                 | 198712 | 271189 | 224508 | 202927 | 207389  | 223406  | 242793 |
| UDP-D-glucuronate             | 80429  | 94931  | 88462  | 96267  | 95968   | 87211   | 73988  |
| UDP-N-acetyl-glucosamine      | 48926  | 67036  | 52169  | 52729  | 53114   | 44948   | 43403  |
| UDP-nega                      | 653    | 717    | 1013   | 692    | 1332    | 890     | 718    |
| UTP-nega                      | 28892  | 49990  | 56658  | 66634  | 66980   | 64525   | 60037  |
| valine-CBZ                    | 39065  | 20891  | 207605 | 751506 | 1173582 | 1592525 | 436179 |
| xanthosine                    | 941    | 350    | 183    | 603    | 446     | 626     | 628    |

| Trimethoprim (4 µg/ml) + no supplements replicate 2 raw data |         |         |         |         |         |         |         |
|--------------------------------------------------------------|---------|---------|---------|---------|---------|---------|---------|
| Time (min)                                                   | 0       | 1       | 5       | 15      | 30      | 60      | 120     |
| Optical density                                              | 0.520   | 0.520   | 0.531   | 0.543   | 0.565   | 0.610   | 0.700   |
| 1,3-diphosphateglycerate                                     | 1587    | 1212    | 617     | 2762    | 2665    | 3160    | 7953    |
| 2,3-dihydroxybenzoate                                        | 590     | 212     | 6027    | 10422   | 19845   | 31015   | 65313   |
| 3-phosphoglycerate                                           | 14725   | 12174   | 10425   | 13289   | 16191   | 20614   | 34116   |
| 5-phosphoribosyl 1-pyrophosphate                             | 2588    | 2386    | 3826    | 9702    | 9443    | 14748   | 11603   |
| 6-phospho-D-gluconate                                        | 15882   | 9130    | 3333    | 2094    | 1907    | 1700    | 2787    |
| acetyl-CoA-nega                                              | 8247    | 6434    | 2835    | 7405    | 6934    | 15551   | 12642   |
| acetylphosphate                                              | 7858    | 4856    | 1673    | 3929    | 4908    | 10717   | 27954   |
| aconitate                                                    | 5797    | 3907    | 3828    | 7453    | 8068    | 8318    | 13802   |
| ADP-D-glucose                                                | 147     | 135     | 143     | 100     | 100     | 100     | 100     |
| ADP-nega                                                     | 1709    | 1361    | 1238    | 782     | 449     | 688     | 1179    |
| a-ketoglutarate                                              | 9890    | 6115    | 5289    | 7112    | 9323    | 8417    | 9647    |
| alanine-CBZ                                                  | 121158  | 112034  | 156790  | 271805  | 229873  | 205521  | 160614  |
| AICAR                                                        | 100     | 100     | 1856    | 3183    | 3811    | 9655    | 12228   |
| arginine-CBZ                                                 | 2440    | 1257    | 6020    | 16735   | 21688   | 20344   | 12353   |
| asparagine-CBZ                                               | 15367   | 9095    | 18526   | 42163   | 52513   | 49220   | 62201   |
| aspartate-CBZ                                                | 34339   | 36879   | 104217  | 211275  | 233787  | 306262  | 376778  |
| ATP-nega                                                     | 20288   | 15981   | 10379   | 11393   | 13614   | 8408    | 7722    |
| carbamoyl-phosphate                                          | 719     | 484     | 965     | 415     | 1044    | 1107    | 484     |
| citrate                                                      | 10412   | 5610    | 6197    | 6902    | 8281    | 11423   | 18217   |
| citrate/isocitrate                                           | 81103   | 51970   | 45448   | 77192   | 71639   | 95457   | 151658  |
| citrulline-CBZ                                               | 5402    | 5540    | 1975    | 2023    | 3259    | 3675    | 4102    |
| coenzyme A-nega                                              | 1083    | 279     | 164     | 785     | 439     | 1254    | 815     |
| CTP-nega                                                     | 4716    | 4098    | 5639    | 4184    | 5371    | 4506    | 2202    |
| dATP-nega                                                    | 2942    | 2128    | 1290    | 2616    | 2333    | 2794    | 2102    |
| dCTP-nega                                                    | 383     | 301     | 583     | 873     | 616     | 227     | 150     |
| dGDP                                                         | 5649    | 4110    | 3741    | 3219    | 3174    | 3192    | 1822    |
| D-glucono-δ-lactone-6-phosphate                              | 126     | 179     | 275     | 241     | 100     | 215     | 332     |
| D-glyceraldehyde-3-phosphate                                 | 7064    | 6135    | 6807    | 9622    | 10267   | 14131   | 22775   |
| dihydroorotate                                               | 26693   | 19607   | 18139   | 16517   | 14725   | 23627   | 38878   |
| dihydroxy-acetone phosphate                                  | 7500    | 5889    | 7261    | 10730   | 10867   | 13286   | 22310   |
| D-sedoheptulose-7-phosphate                                  | 5419    | 3187    | 2721    | 3065    | 3566    | 4548    | 5625    |
| dTTP-nega                                                    | 6653    | 5460    | 3376    | 2221    | 1272    | 1318    | 1692    |
| dUMP-nega                                                    | 139     | 520     | 13599   | 22140   | 24702   | 17591   | 12665   |
| fructose-1,6-bisphosphate                                    | 26258   | 27764   | 18923   | 19960   | 15299   | 22344   | 49447   |
| fructose-6-phosphate                                         | 648     | 318     | 701     | 971     | 972     | 1280    | 2093    |
| fumarate C12                                                 | 701     | 337     | 1120    | 1277    | 1296    | 1677    | 2065    |
| geranyl-PP                                                   | 5183    | 2776    | 100     | 3870    | 4010    | 3837    | 2560    |
| glucono-δ-lactone                                            | 3610    | 1825    | 1529    | 1532    | 1597    | 1520    | 1560    |
| glucose-1-phosphate                                          | 2076    | 2556    | 2184    | 3236    | 3544    | 3897    | 4830    |
| glutamate-CBZ                                                | 1548576 | 1758448 | 1716525 | 2778981 | 3176899 | 3722875 | 3224124 |
| glutamine-CBZ                                                | 68898   | 69658   | 93565   | 165714  | 208829  | 256015  | 244198  |
| glutathione disulfide-nega                                   | 12623   | 10486   | 15185   | 12121   | 10647   | 13111   | 9453    |
| glutathione-nega                                             | 97185   | 101507  | 65571   | 113655  | 105114  | 126738  | 104358  |
| glutathionine-MMTS                                           | 25606   | 28495   | 15895   | 32708   | 28062   | 30183   | 28029   |
| glycerate                                                    | 384     | 377     | 265     | 360     | 443     | 376     | 228     |
| glycine-CBZ                                                  | 117666  | 82805   | 19092   | 9258    | 6895    | 8349    | 11175   |
| GTP-nega                                                     | 10522   | 8530    | 3582    | 8690    | 10903   | 8127    | 3531    |
| hexose-phosphate                                             | 7362    | 5963    | 6549    | 10285   | 10543   | 14885   | 26273   |
| histidine-CBZ                                                | 5930    | 3934    | 4951    | 3651    | 2806    | 2440    | 2860    |
| homocysteine-MMTS                                            | 1643    | 1241    | 1725    | 5561    | 10159   | 10900   | 7085    |
| hydroxyphenylpyruvate                                        | 182     | 100     | 100     | 100     | 649     | 809     | 1138    |

|                               |        |        |        |        |        |        |        |
|-------------------------------|--------|--------|--------|--------|--------|--------|--------|
| isocitrate                    | 238    | 368    | 18     | 120    | 276    | 183    | 934    |
| lactate                       | 4449   | 2635   | 3436   | 1802   | 1295   | 1689   | 4324   |
| leucine/isoleucine-CBZ        | 29647  | 21367  | 34395  | 63860  | 57756  | 51031  | 20530  |
| lysine-CBZ                    | 22795  | 17204  | 28441  | 126624 | 190714 | 222054 | 167235 |
| malate                        | 12823  | 5912   | 7468   | 18748  | 17970  | 23439  | 46106  |
| methionine-CBZ                | 5398   | 3733   | 2123   | 5119   | 5789   | 7791   | 7251   |
| myo-inositol                  | 10689  | 3119   | 6280   | 4942   | 5277   | 5642   | 3638   |
| NAD+_nega                     | 3662   | 2789   | 1453   | 3732   | 3536   | 5730   | 7161   |
| NADP+_nega                    | 1145   | 556    | 664    | 531    | 330    | 710    | 291    |
| NADPH_nega                    | 920    | 709    | 145    | 993    | 1762   | 1312   | 1455   |
| ornithine-CBZ                 | 3340   | 4124   | 397    | 3418   | 2102   | 1019   | 5980   |
| orotate                       | 12147  | 4043   | 3710   | 2864   | 4460   | 4419   | 2889   |
| oxaloacetate                  | 2399   | 2344   | 1734   | 2277   | 1944   | 2472   | 2581   |
| pantothenate                  | 100    | 100    | 100    | 100    | 351    | 1966   | 1969   |
| phenylalanine-CBZ             | 100    | 100    | 900    | 2051   | 1647   | 2032   | 2435   |
| phenylpyruvate                | 1792   | 1236   | 2783   | 4053   | 5136   | 7722   | 9064   |
| phosphoenolpyruvate           | 171872 | 171358 | 133174 | 130869 | 142814 | 148261 | 176430 |
| p-hydroxybenzoate             | 3182   | 1239   | 3066   | 1465   | 2335   | 4676   | 7144   |
| prephenate                    | 122    | 126    | 11     | 381    | 246    | 1060   | 1703   |
| proline-CBZ                   | 76497  | 57549  | 36182  | 49274  | 46805  | 44365  | 40796  |
| pyruvate                      | 528    | 115    | 166    | 195    | 129    | 1440   | 8051   |
| quinolinate                   | 4411   | 3032   | 10575  | 2999   | 3834   | 3684   | 2355   |
| ribose-phosphate              | 7336   | 5170   | 4991   | 4860   | 3778   | 5159   | 13295  |
| serine-CBZ                    | 16796  | 10088  | 3938   | 6445   | 5709   | 7714   | 5227   |
| shikimate-3-phosphate         | 123    | 113    | 197    | 215    | 170    | 164    | 199    |
| sn-glycerol-3-phosphate       | 3597   | 2088   | 1585   | 2220   | 2937   | 2847   | 4451   |
| S-ribosyl-L-homocysteine-nega | 768    | 537    | 363    | 767    | 1197   | 826    | 503    |
| succinate C12                 | 28429  | 27321  | 28711  | 28107  | 29018  | 29445  | 33887  |
| threonine-CBZ                 | 23131  | 16268  | 21030  | 36930  | 44763  | 44247  | 25233  |
| trehalose                     | 1137   | 293    | 557    | 1162   | 607    | 3131   | 23670  |
| trehalose 6-Phosphate         | 343    | 571    | 121    | 323    | 411    | 2260   | 10064  |
| trptophan-CBZ                 | 496    | 147    | 579    | 1384   | 1069   | 2013   | 1267   |
| tyrosine-CBZ                  | 668    | 983    | 8090   | 15707  | 15782  | 25560  | 18010  |
| UDP-D-glucose                 | 174507 | 119391 | 61208  | 120254 | 138431 | 167986 | 131054 |
| UDP-D-glucuronate             | 73438  | 70366  | 65031  | 71677  | 71574  | 66323  | 66775  |
| UDP-N-acetyl-glucosamine      | 46888  | 37906  | 19471  | 33968  | 40576  | 38772  | 29797  |
| UDP-nega                      | 1362   | 609    | 1267   | 656    | 505    | 558    | 665    |
| UTP-nega                      | 17868  | 14519  | 15598  | 21253  | 23180  | 22675  | 17135  |
| valine-CBZ                    | 66770  | 61540  | 264970 | 804245 | 886195 | 816448 | 129489 |
| xanthosine                    | 1408   | 374    | 870    | 180    | 213    | 374    | 396    |

**Trimethoprim (4 µg/ml) + no supplements replicate 3 raw data**

| Time (min)                       | 0        | 1       | 5       | 15       | 30       | 60       | 120      |
|----------------------------------|----------|---------|---------|----------|----------|----------|----------|
| Optical density                  | 0.500    | 0.500   | 0.507   | 0.515    | 0.530    | 0.559    | 0.618    |
| 1,3-diphosphateglycerate         | 437      | 959     | 1855    | 1393     | 2720     | 3946     | 8439     |
| 2,3-dihydroxybenzoate            | 2287     | 2169    | 8457    | 33887    | 75411    | 101622   | 164563   |
| 3-phosphoglycerate               | 4383     | 6100    | 4224    | 4273     | 5622     | 5853     | 6914     |
| 5-phosphoribosyl 1-pyrophosphate | 19898    | 21731   | 60761   | 53046    | 75417    | 92788    | 83288    |
| 6-phospho-D-gluconate            | 7992     | 6722    | 3661    | 1412     | 662      | 1469     | 1830     |
| acetyl-CoA-nega                  | 10311    | 10999   | 10240   | 9716     | 13237    | 15743    | 15978    |
| acetylphosphate                  | 7763     | 10313   | 7643    | 9087     | 10921    | 20362    | 39543    |
| aconitate                        | 14462    | 10095   | 17239   | 23145    | 22504    | 21733    | 23258    |
| ADP-D-glucose                    | 488      | 773     | 919     | 444      | 151      | 100      | 100      |
| ADP-nega                         | 7817     | 4993    | 3945    | 2495     | 2442     | 2262     | 922      |
| a-ketoglutarate                  | 21273    | 14191   | 17632   | 16921    | 20764    | 19691    | 16731    |
| alanine-CBZ                      | 419480   | 315518  | 439157  | 839433   | 843679   | 774798   | 658447   |
| AICAR                            | 100      | 100     | 1753    | 3550     | 3636     | 4150     | 5151     |
| arginine-CBZ                     | 11575    | 6089    | 14920   | 36298    | 46078    | 51998    | 33026    |
| asparagine-CBZ                   | 87309    | 34034   | 66128   | 181788   | 218282   | 222463   | 248648   |
| aspartate-CBZ                    | 290612   | 151484  | 445902  | 1013238  | 1245456  | 1525494  | 1676500  |
| ATP-nega                         | 68852    | 71615   | 77740   | 51514    | 49595    | 36986    | 30331    |
| carbamoyl-phosphate              | 1733     | 1909    | 2736    | 2071     | 2977     | 2454     | 1507     |
| citrate                          | 28047    | 28781   | 50564   | 44047    | 43153    | 40446    | 35033    |
| citrate/isocitrate               | 256144   | 253875  | 453376  | 414333   | 359896   | 352736   | 335055   |
| citrulline-CBZ                   | 25934    | 16712   | 11876   | 12729    | 13678    | 14004    | 18667    |
| coenzyme A-nega                  | 100      | 366     | 339     | 860      | 1063     | 1883     | 1532     |
| CTP-nega                         | 21954    | 19600   | 25681   | 17556    | 23545    | 18186    | 11179    |
| dATP-nega                        | 5973     | 7540    | 7669    | 5566     | 4785     | 6698     | 5297     |
| dCTP-nega                        | 3115     | 3412    | 3847    | 2892     | 2796     | 1487     | 1601     |
| dGDP                             | 400      | 274     | 812     | 522      | 107      | 177      | 100      |
| D-glucono-δ-lactone-6-phosphate  | 2678     | 2585    | 3181    | 3170     | 3159     | 3693     | 3605     |
| D-glyceraldehyde-3-phosphate     | 7270     | 7102    | 9440    | 8857     | 9508     | 11638    | 18658    |
| dihydroorotate                   | 78077    | 54775   | 36625   | 15907    | 19775    | 34686    | 70290    |
| dihydroxy-acetone phosphate      | 6878     | 6516    | 8906    | 9681     | 9746     | 12883    | 17987    |
| D-sedoheptulose-7-phosphate      | 4507     | 4032    | 4346    | 3360     | 3987     | 3915     | 5256     |
| dTTP-nega                        | 18788    | 18891   | 20637   | 8722     | 6577     | 5077     | 3988     |
| dUMP-nega                        | 121      | 353     | 9308    | 11522    | 11264    | 9229     | 6701     |
| fructose-1,6-bisphosphate        | 84571    | 96510   | 99941   | 48224    | 55203    | 67692    | 137267   |
| fructose-6-phosphate             | 991      | 375     | 804     | 662      | 1019     | 1375     | 2823     |
| fumarate C12                     | 656      | 877     | 782     | 954      | 1129     | 1638     | 1387     |
| geranyl-PP                       | 1454     | 5647    | 1474    | 1429     | 1352     | 1706     | 1896     |
| glucono-δ-lactone                | 2031     | 2480    | 3577    | 4777     | 4556     | 3107     | 2994     |
| glucose-1-phosphate              | 2131     | 1738    | 1297    | 1088     | 2474     | 2036     | 2264     |
| glutamate-CBZ                    | 10111722 | 7757925 | 8576231 | 13761355 | 15740585 | 16708694 | 16079442 |
| glutamine-CBZ                    | 366167   | 266531  | 331810  | 719843   | 844493   | 835117   | 768809   |
| glutathione disulfide-nega       | 39729    | 33691   | 23631   | 22621    | 21088    | 12481    | 6997     |
| glutathione-nega                 | 282704   | 271078  | 297752  | 237982   | 225966   | 153388   | 113737   |
| glutathionine-MMTS               | 16001    | 17803   | 14184   | 15517    | 11144    | 9506     | 7027     |
| glycerate                        | 2489     | 1765    | 1547    | 384      | 941      | 789      | 385      |
| glycine-CBZ                      | 42401    | 22915   | 5181    | 2948     | 3620     | 7379     | 4364     |
| GTP-nega                         | 31778    | 35559   | 29531   | 27027    | 28510    | 32016    | 21127    |
| hexose-phosphate                 | 6551     | 6509    | 8162    | 8172     | 10970    | 10385    | 15051    |
| histidine-CBZ                    | 26699    | 15820   | 18001   | 13646    | 13726    | 13760    | 10637    |
| homocysteine-MMTS                | 1913     | 643     | 2172    | 13714    | 15391    | 15038    | 13798    |
| hydroxyphenylpyruvate            | 298      | 100     | 182     | 447      | 965      | 1261     | 1890     |

|                               |        |        |        |         |         |         |         |
|-------------------------------|--------|--------|--------|---------|---------|---------|---------|
| isocitrate                    | 397    | 221    | 374    | 67      | 478     | 502     | 905     |
| lactate                       | 11510  | 7741   | 9545   | 5744    | 7194    | 10251   | 8090    |
| leucine/isoleucine-CBZ        | 99431  | 48494  | 169690 | 359604  | 383950  | 301485  | 152425  |
| lysine-CBZ                    | 281128 | 135831 | 294873 | 1697227 | 2396043 | 2734920 | 2614651 |
| malate                        | 27883  | 23818  | 31569  | 28715   | 41012   | 46679   | 56126   |
| methionine-CBZ                | 32159  | 17872  | 15435  | 9341    | 10306   | 16728   | 26654   |
| myo-inositol                  | 5604   | 14199  | 13548  | 9694    | 12269   | 14920   | 12842   |
| NAD+_nega                     | 29790  | 26912  | 36137  | 36004   | 42757   | 50264   | 63949   |
| NADP+_nega                    | 31321  | 29247  | 28028  | 18290   | 25511   | 31621   | 24537   |
| NADPH_nega                    | 2304   | 2836   | 4322   | 2923    | 4384    | 3988    | 5021    |
| ornithine-CBZ                 | 39109  | 21324  | 11910  | 13184   | 15842   | 18461   | 41327   |
| orotate                       | 27194  | 15096  | 10336  | 9351    | 10006   | 9899    | 7647    |
| oxaloacetate                  | 1938   | 2837   | 1539   | 1660    | 1537    | 2234    | 1043    |
| pantothenate                  | 100    | 100    | 100    | 151     | 569     | 1612    | 2503    |
| phenylalanine-CBZ             | 1572   | 523    | 4601   | 11932   | 14285   | 17597   | 23934   |
| phenylpyruvate                | 5467   | 2737   | 7130   | 13348   | 22705   | 20274   | 34613   |
| phosphoenolpyruvate           | 148058 | 142649 | 153311 | 138970  | 158365  | 158083  | 169331  |
| p-hydroxybenzoate             | 3133   | 2504   | 2573   | 3452    | 5239    | 5751    | 7685    |
| prephenate                    | 1260   | 295    | 2895   | 6552    | 10293   | 12830   | 19166   |
| proline-CBZ                   | 79925  | 62519  | 55609  | 36067   | 36537   | 35852   | 29746   |
| pyruvate                      | 5191   | 3944   | 3913   | 2290    | 3689    | 8492    | 13418   |
| quinolinate                   | 16611  | 20873  | 37381  | 25091   | 27703   | 32060   | 25624   |
| ribose-phosphate              | 7255   | 7700   | 8303   | 6151    | 5476    | 7012    | 8021    |
| serine-CBZ                    | 65946  | 27769  | 12700  | 15846   | 18354   | 23284   | 20440   |
| shikimate-3-phosphate         | 1754   | 1804   | 1913   | 2964    | 2717    | 2912    | 3294    |
| sn-glycerol-3-phosphate       | 4350   | 3077   | 2228   | 2971    | 2293    | 3230    | 2756    |
| S-ribosyl-L-homocysteine-nega | 1847   | 1777   | 2031   | 1136    | 1505    | 2132    | 3503    |
| succinate C12                 | 19630  | 18525  | 18603  | 27291   | 32975   | 38859   | 48511   |
| threonine-CBZ                 | 51061  | 26883  | 65488  | 134584  | 139366  | 121477  | 103897  |
| trehalose                     | 11051  | 4763   | 2225   | 1493    | 918     | 1226    | 2963    |
| trehalose 6-Phosphate         | 100    | 392    | 283    | 152     | 446     | 1840    | 4344    |
| trptophan-CBZ                 | 4414   | 2795   | 12458  | 12725   | 17788   | 20934   | 25093   |
| tyrosine-CBZ                  | 2173   | 1900   | 26912  | 40468   | 58120   | 125040  | 129043  |
| UDP-D-glucose                 | 219214 | 206440 | 211509 | 158921  | 206383  | 228481  | 161101  |
| UDP-D-glucuronate             | 236408 | 241370 | 270508 | 221237  | 233604  | 197161  | 211586  |
| UDP-N-acetyl-glucosamine      | 53736  | 54266  | 53237  | 40654   | 53316   | 48155   | 38509   |
| UDP-nega                      | 2748   | 2735   | 2490   | 1458    | 1319    | 2158    | 1723    |
| UTP-nega                      | 35885  | 38777  | 55737  | 47381   | 57008   | 52149   | 41826   |
| valine-CBZ                    | 164599 | 103454 | 584146 | 2251896 | 2364660 | 1913519 | 1084937 |
| xanthosine                    | 1468   | 1207   | 480    | 637     | 239     | 344     | 384     |

**Trimethoprim (4 µg/ml) + no supplements replicate 4 raw data**

| Time (min)                         | 0       | 1       | 5        | 15       | 30       | 60       | 120      |
|------------------------------------|---------|---------|----------|----------|----------|----------|----------|
| Optical density                    | 0.570   | 0.570   | 0.554    | 0.566    | 0.587    | 0.581    | 0.740    |
| 1,3-diphosphateglycerate           | 100     | 100     | 100      | 100      | 172      | 735      | 798      |
| 2,3-dihydroxybenzoate              | 2347    | 1144    | 28178    | 93132    | 98344    | 100228   | 75364    |
| 2,3-Diphosphoglyceric acid         | 848     | 1043    | 1828     | 1691     | 983      | 6926     | 6809     |
| 2-Hydroxy-2-methylbutanedioic acid | 28477   | 12167   | 7009     | 3469     | 3322     | 2524     | 2374     |
| 2-Isopropylmalic acid              | 98750   | 71998   | 17788    | 8142     | 6897     | 10163    | 14446    |
| 3-phosphoglycerate                 | 1735    | 2054    | 1149     | 1782     | 1823     | 2717     | 3082     |
| 5-phosphoribosyl 1-pyrophosphate   | 7436    | 11530   | 28869    | 13341    | 15551    | 67247    | 88524    |
| 6-phospho-D-gluconate              | 2757    | 3072    | 568      | 176      | 9        | 52       | 31       |
| acetyl-CoA-nega                    | 12000   | 13812   | 7548     | 8895     | 10530    | 14814    | 13146    |
| acetylphosphate                    | 2754    | 1951    | 1874     | 2068     | 2906     | 4158     | 6247     |
| aconitate                          | 2702    | 946     | 1733     | 1574     | 1974     | 2569     | 3278     |
| adenosine 5'-phosphosulfate        | 670     | 419     | 424      | 228      | 90       | 549      | 212      |
| ADP-nega                           | 2319    | 1808    | 1232     | 1316     | 1113     | 1099     | 980      |
| alanine-CBZ                        | 202754  | 201291  | 539595   | 1001351  | 739063   | 736856   | 558446   |
| arginine-CBZ                       | 3381    | 3425    | 17273    | 25750    | 27181    | 25926    | 23485    |
| asparagine-CBZ                     | 31999   | 26465   | 86964    | 103940   | 97624    | 104869   | 117341   |
| aspartate-CBZ                      | 161881  | 190314  | 645061   | 612151   | 633237   | 632190   | 710199   |
| ATP-nega                           | 32796   | 34209   | 37620    | 21444    | 25152    | 39733    | 21043    |
| citrate                            | 4855    | 3503    | 6505     | 2279     | 1416     | 2344     | 4188     |
| citrate-isocitrate                 | 35569   | 28764   | 47216    | 15716    | 16603    | 27088    | 36277    |
| citrulline-CBZ                     | 17663   | 18088   | 7983     | 7948     | 7412     | 8843     | 10926    |
| coenzyme A-nega                    | 1662    | 1257    | 3935     | 4925     | 5892     | 6089     | 5509     |
| CTP-nega                           | 10109   | 9175    | 16258    | 9320     | 11535    | 20432    | 14414    |
| dATP-nega                          | 2147    | 2193    | 1503     | 2594     | 3793     | 3490     | 2611     |
| dCTP-nega                          | 1923    | 2643    | 3296     | 2181     | 1539     | 2486     | 1666     |
| D-erythrose-4-phosphate            | 1116    | 507     | 601      | 920      | 621      | 603      | 885      |
| D-glucono-δ-lactone-6-phosphate    | 763     | 807     | 621      | 335      | 480      | 692      | 939      |
| D-glyceraldehyde-3-phosphate       | 285     | 386     | 491      | 172      | 381      | 738      | 457      |
| dihydroxy-acetone phosphate        | 3776    | 4171    | 6029     | 4658     | 5945     | 6598     | 6952     |
| D-sedoheptulose-7-phosphate        | 1843    | 1487    | 1456     | 1135     | 1500     | 1911     | 2453     |
| dTTP-nega                          | 4744    | 4516    | 2759     | 206      | 148      | 54       | 36       |
| dUMP-nega                          | 100     | 519     | 2577     | 3472     | 3515     | 2875     | 2233     |
| fructose-1,6-bisphosphate          | 16795   | 28995   | 29146    | 15884    | 12329    | 22838    | 32039    |
| fructose-6-phosphate               | 890     | 897     | 1954     | 1470     | 797      | 1418     | 1599     |
| geranyl-PP                         | 5899    | 5590    | 3371     | 3814     | 4199     | 4692     | 4353     |
| glucosamine                        | 15090   | 13061   | 16017    | 10991    | 14706    | 11419    | 13047    |
| glucose-1-phosphate                | 1060    | 598     | 797      | 240      | 872      | 408      | 450      |
| glutamate-CBZ                      | 7510476 | 8400106 | 10168289 | 10433115 | 10563452 | 10353123 | 10236839 |
| glutamine-CBZ                      | 345534  | 319835  | 635593   | 579260   | 545132   | 558992   | 570757   |
| glutathione disulfide-nega         | 10942   | 11645   | 11728    | 7403     | 6332     | 7328     | 4885     |
| glutathione-nega                   | 87933   | 92000   | 92291    | 90076    | 78012    | 90494    | 74076    |
| glutathionine-MMTS                 | 2746    | 2414    | 2364     | 1548     | 1926     | 1699     | 1191     |
| glycine-CBZ                        | 26512   | 6125    | 1841     | 977      | 1545     | 1746     | 1212     |
| GTP-nega                           | 9442    | 10598   | 7917     | 5726     | 7503     | 17593    | 13422    |
| hexose-phosphate                   | 9408    | 5546    | 8857     | 7055     | 7348     | 11157    | 11920    |
| homocysteine-MMTS                  | 2553    | 1698    | 3035     | 15039    | 20635    | 23044    | 21920    |
| Indoleacrylic acid                 | 4795    | 3480    | 5088     | 5768     | 6071     | 5595     | 5748     |
| leucine/isoleucine                 | 12184   | 384     | 29584    | 43940    | 41794    | 39609    | 28732    |
| lysine-CBZ                         | 106939  | 101683  | 403040   | 858415   | 1034497  | 1107632  | 1315059  |
| malate                             | 31348   | 22847   | 24141    | 19042    | 18637    | 19455    | 23096    |
| methionine-CBZ                     | 14355   | 15991   | 12157    | 3525     | 2159     | 2340     | 5050     |

|                            |        |        |        |         |         |         |         |
|----------------------------|--------|--------|--------|---------|---------|---------|---------|
| NAD+_nega                  | 19730  | 19507  | 22574  | 21982   | 26849   | 36853   | 37309   |
| NADP+_nega                 | 7934   | 9289   | 9713   | 7369    | 8902    | 10683   | 6307    |
| NADPH_nega                 | 4528   | 4054   | 4236   | 3360    | 3687    | 5919    | 5121    |
| N-Carbamoyl-L-aspartate    | 7419   | 4437   | 413    | 1161    | 1410    | 1211    | 399     |
| Octulose bisposphate       | 243    | 231    | 293    | 74      | 103     | 88      | 188     |
| Octulose-Phosphate         | 427    | 320    | 305    | 383     | 242     | 339     | 551     |
| ornithine-CBZ              | 15716  | 12050  | 6307   | 7670    | 6524    | 7060    | 8252    |
| pantothenate               | 100    | 100    | 179    | 1868    | 1925    | 2029    | 2108    |
| phenylalanine-CBZ          | 616    | 524    | 6076   | 10127   | 8602    | 8331    | 8253    |
| phenylpyruvate             | 1286   | 454    | 2710   | 2495    | 3026    | 5198    | 5863    |
| phosphoenolpyruvate        | 280    | 392    | 1055   | 1742    | 2103    | 2173    | 3002    |
| prephenate                 | 304    | 188    | 1302   | 1858    | 3349    | 4170    | 3624    |
| proline-CBZ                | 65460  | 54438  | 34983  | 32214   | 31445   | 35137   | 29029   |
| Pyrophosphate              | 1023   | 434    | 1109   | 620     | 1135    | 3191    | 3476    |
| ribose-phosphate           | 2902   | 2564   | 5120   | 2096    | 2659    | 2653    | 3805    |
| Sedoheptulose bisphosphate | 216    | 211    | 554    | 628     | 638     | 2393    | 3793    |
| serine-CBZ                 | 39826  | 17484  | 10952  | 6996    | 7797    | 9420    | 11011   |
| sn-glycerol-3-phosphate    | 1009   | 1039   | 1076   | 907     | 550     | 1261    | 802     |
| threonine-CBZ              | 46940  | 42378  | 118749 | 159813  | 145387  | 146308  | 119068  |
| tryptophan-CBZ             | 2779   | 2907   | 15691  | 14831   | 13124   | 14725   | 13989   |
| tyrosine-CBZ               | 2968   | 4193   | 60299  | 102189  | 105447  | 109141  | 95969   |
| UDP-D-glucose              | 125466 | 149946 | 104523 | 83208   | 97305   | 137513  | 130678  |
| UDP-D-glucuronate          | 48367  | 43849  | 55466  | 45529   | 49735   | 49151   | 49128   |
| UDP-N-acetyl-glucosamine   | 21074  | 24202  | 22302  | 19317   | 24125   | 21216   | 16342   |
| uracil                     | 100    | 100    | 150    | 627     | 539     | 1488    | 1014    |
| UTP-nega                   | 20146  | 18526  | 27667  | 20467   | 25032   | 39886   | 30891   |
| valine-CBZ                 | 43269  | 46480  | 510272 | 1418130 | 1152968 | 1232623 | 1157927 |



**Trimethoprim (4 µg/ml) + no supplements replicate 5 raw data**

| Time (min)                         | 0       | 1       | 5       | 15      | 30      | 60       | 120      |
|------------------------------------|---------|---------|---------|---------|---------|----------|----------|
| Optical density                    | 0.570   | 0.570   | 0.554   | 0.566   | 0.587   | 0.581    | 0.740    |
| 1,3-diphosphateglycerate           | 113     | 155     | 244     | 408     | 566     | 101      | 376      |
| 2,3-dihydroxybenzoate              | 1460    | 474     | 25870   | 99219   | 104057  | 75279    | 70849    |
| 2,3-Diphosphoglyceric acid         | 2156    | 1353    | 1144    | 4647    | 4330    | 1890     | 2972     |
| 2-Hydroxy-2-methylbutanedioic acid | 31993   | 14128   | 6582    | 3168    | 2839    | 2199     | 2983     |
| 2-Isopropylmalic acid              | 117666  | 82805   | 19092   | 9258    | 6895    | 8349     | 11175    |
| 3-phosphoglycerate                 | 2284    | 2019    | 2194    | 1786    | 2901    | 1954     | 3223     |
| 5-phosphoribosyl 1-pyrophosphate   | 26080   | 16935   | 27812   | 46395   | 42721   | 19522    | 37801    |
| 6-phospho-D-gluconate              | 5872    | 2313    | 143     | 82      | 39      | 28       | 26       |
| acetyl-CoA-nega                    | 9478    | 12374   | 6502    | 7889    | 9334    | 9610     | 13505    |
| acetylphosphate                    | 2686    | 2319    | 1500    | 1151    | 1884    | 3454     | 5252     |
| aconitate                          | 2813    | 1831    | 2875    | 1658    | 1743    | 2005     | 3309     |
| adenosine 5'-phosphosulfate        | 851     | 1051    | 246     | 179     | 564     | 119      | 72       |
| ADP-nega                           | 1855    | 2215    | 1244    | 1294    | 1166    | 737      | 693      |
| alanine-CBZ                        | 159298  | 160414  | 448102  | 890773  | 792920  | 742184   | 504499   |
| arginine-CBZ                       | 2286    | 3594    | 16172   | 23842   | 25631   | 27503    | 26416    |
| asparagine-CBZ                     | 26683   | 28282   | 88392   | 101966  | 100226  | 111005   | 122228   |
| aspartate-CBZ                      | 124053  | 157579  | 514280  | 529058  | 550739  | 646683   | 684513   |
| ATP-nega                           | 59456   | 51589   | 45886   | 39184   | 31569   | 19770    | 21333    |
| citrate                            | 30356   | 8578    | 9675    | 4441    | 3010    | 2413     | 4279     |
| citrate-isocitrate                 | 245922  | 58804   | 76605   | 26781   | 24303   | 20983    | 31366    |
| citrulline-CBZ                     | 16036   | 18124   | 7748    | 9834    | 8074    | 9604     | 11384    |
| coenzyme A-nega                    | 2738    | 4628    | 7167    | 7291    | 7306    | 6903     | 5987     |
| CTP-nega                           | 16232   | 16460   | 19811   | 17118   | 19773   | 9414     | 10905    |
| dATP-nega                          | 3313    | 2971    | 2455    | 4853    | 4193    | 3098     | 2975     |
| dCTP-nega                          | 3337    | 3466    | 3607    | 2620    | 3111    | 2159     | 1299     |
| D-erythrose-4-phosphate            | 793     | 1151    | 689     | 653     | 1075    | 635      | 541      |
| D-glucono-δ-lactone-6-phosphate    | 904     | 455     | 1047    | 1033    | 1099    | 608      | 617      |
| D-glyceraldehyde-3-phosphate       | 706     | 652     | 451     | 623     | 339     | 298      | 436      |
| dihydroxy-acetone phosphate        | 4331    | 4568    | 5855    | 5466    | 4400    | 4245     | 6927     |
| D-sedoheptulose-7-phosphate        | 2952    | 1882    | 1894    | 1135    | 1794    | 1404     | 1926     |
| dTTP-nega                          | 7228    | 5806    | 4384    | 507     | 242     | 6        | 32       |
| dUMP-nega                          | 100     | 566     | 3384    | 4026    | 2578    | 3654     | 2353     |
| fructose-1,6-bisphosphate          | 44532   | 41880   | 34707   | 31368   | 24113   | 9880     | 13061    |
| fructose-6-phosphate               | 1609    | 859     | 1172    | 981     | 1333    | 912      | 1285     |
| geranyl-PP                         | 4532    | 4009    | 4578    | 3777    | 4130    | 4407     | 3836     |
| glucosamine                        | 16794   | 19170   | 16709   | 20273   | 19787   | 13103    | 20425    |
| glucose-1-phosphate                | 1375    | 512     | 833     | 729     | 672     | 401      | 323      |
| glutamate-CBZ                      | 6450599 | 7047712 | 9228792 | 9354892 | 9874103 | 10546682 | 10323251 |
| glutamine-CBZ                      | 291825  | 297310  | 618436  | 562835  | 571957  | 603699   | 622588   |
| glutathione disulfide-nega         | 22410   | 17952   | 18096   | 11598   | 11779   | 7780     | 8389     |
| glutathione-nega                   | 52997   | 81583   | 82009   | 69337   | 64719   | 74210    | 85331    |
| glutathionine-MMTS                 | 1572    | 2348    | 2718    | 2147    | 1643    | 2437     | 2282     |
| glycine-CBZ                        | 23533   | 6401    | 2033    | 1738    | 1424    | 1312     | 1324     |
| GTP-nega                           | 21832   | 18956   | 11159   | 14225   | 18710   | 12045    | 12131    |
| hexose-phosphate                   | 11598   | 8019    | 9652    | 8603    | 9740    | 5787     | 7657     |
| histidine-CBZ                      | 7145    | 8481    | 19879   | 6923    | 5516    | 5690     | 5759     |
| homocysteine-MMTS                  | 2295    | 1596    | 2585    | 12846   | 14712   | 17123    | 28649    |
| Indoleacrylic acid                 | 4074    | 4581    | 4480    | 5167    | 5583    | 4917     | 5741     |
| leucine/isoleucine                 | 7083    | 7855    | 19548   | 30065   | 26076   | 25706    | 25600    |
| lysine-CBZ                         | 91727   | 99928   | 418649  | 780882  | 1023173 | 1203547  | 1390620  |
| malate                             | 38364   | 22695   | 21885   | 16539   | 19774   | 20429    | 22266    |

|                            |        |        |        |         |         |         |         |
|----------------------------|--------|--------|--------|---------|---------|---------|---------|
| methionine-CBZ             | 17263  | 17187  | 13170  | 3307    | 2771    | 2723    | 6147    |
| NAD+_nega                  | 19928  | 22560  | 24806  | 23734   | 29839   | 33543   | 41468   |
| NADP+_nega                 | 9783   | 13006  | 12897  | 12796   | 11047   | 6500    | 5770    |
| NADPH_nega                 | 4109   | 2905   | 4155   | 3390    | 2971    | 4080    | 3770    |
| N-Carbamoyl-L-aspartate    | 8280   | 5307   | 194    | 1779    | 1086    | 1121    | 1047    |
| Octulose bisposphate       | 914    | 244    | 420    | 669     | 151     | 154     | 186     |
| Octulose-Phosphate         | 607    | 270    | 207    | 518     | 223     | 85      | 287     |
| ornithine-CBZ              | 12463  | 11925  | 7083   | 7754    | 6799    | 10097   | 8940    |
| pantothenate               | 100    | 135    | 187    | 1406    | 2301    | 2202    | 3046    |
| phenylalanine-CBZ          | 453    | 837    | 4931   | 8330    | 9603    | 6257    | 7594    |
| phenylpyruvate             | 1905   | 712    | 2628   | 4051    | 4035    | 3932    | 4661    |
| phosphoenolpyruvate        | 1347   | 801    | 2565   | 2194    | 1835    | 2316    | 2776    |
| prephenate                 | 147    | 264    | 1578   | 2680    | 2386    | 2845    | 3399    |
| proline-CBZ                | 53081  | 50588  | 24122  | 27071   | 26697   | 29317   | 25387   |
| Pyrophosphate              | 1901   | 1975   | 2107   | 3128    | 3320    | 1200    | 2236    |
| ribose-phosphate           | 2746   | 2802   | 3319   | 1991    | 1682    | 2200    | 2933    |
| Sedoheptulose bisphosphate | 1689   | 274    | 677    | 1548    | 1514    | 662     | 755     |
| serine-CBZ                 | 29630  | 17107  | 8528   | 8306    | 8006    | 9047    | 10876   |
| sn-glycerol-3-phosphate    | 2570   | 1953   | 1165   | 928     | 851     | 895     | 1043    |
| threonine-CBZ              | 35599  | 38581  | 98273  | 141323  | 131922  | 135108  | 120023  |
| tryptophan-CBZ             | 2376   | 3093   | 13532  | 15331   | 12971   | 12376   | 11545   |
| tyrosine-CBZ               | 3525   | 4745   | 60140  | 94905   | 100284  | 88556   | 91361   |
| UDP-D-glucose              | 138166 | 146101 | 103988 | 79059   | 95645   | 120853  | 128711  |
| UDP-D-glucuronate          | 49832  | 60022  | 61188  | 51225   | 49086   | 34706   | 41082   |
| UDP-N-acetyl-glucosamine   | 26842  | 25337  | 18174  | 20159   | 17738   | 17800   | 17898   |
| uracil                     | 100    | 100    | 100    | 724     | 797     | 1031    | 1553    |
| UTP-nega                   | 31115  | 26219  | 31629  | 36504   | 36054   | 28893   | 29784   |
| valine-CBZ                 | 46456  | 55886  | 463794 | 1455661 | 1264260 | 1271431 | 1258268 |

**Trimethoprim (4 µg/ml) + 0.3 mM thymine replicate 1 raw data**

| Time (min)                         | 0        | 1        | 5        | 15       | 30       | 60       | 120      |
|------------------------------------|----------|----------|----------|----------|----------|----------|----------|
| Optical density                    | 0.418    | 0.418    | 0.424    | 0.431    | 0.443    | 0.469    | 0.519    |
| 1,3-diphosphateglycerate           | 1543     | 743      | 603      | 539      | 1096     | 1013     | 1775     |
| 2,3-dihydroxybenzoate              | 626      | 339      | 6449     | 22571    | 50052    | 126241   | 173598   |
| 2,3-Diphosphoglyceric acid         | 9072     | 4551     | 4968     | 4542     | 3672     | 8167     | 11756    |
| 2-dehydro-D-gluconate              | 11850    | 8932     | 6312     | 6675     | 7938     | 5469     | 5679     |
| 2-Hydroxy-2-methylbutanedioic acid | 112427   | 31869    | 26827    | 24377    | 20492    | 21223    | 18759    |
| 2-Isopropylmalic acid              | 330308   | 211336   | 159377   | 54353    | 40834    | 60287    | 157015   |
| 2-keto-isovalerate                 | 812      | 896      | 1250     | 1072     | 1290     | 1219     | 852      |
| 3-phosphoglycerate                 | 3998     | 2961     | 3701     | 4667     | 5371     | 7184     | 7088     |
| 4-Pyridoxic acid                   | 3545     | 3344     | 3206     | 4167     | 4326     | 4337     | 2795     |
| 5-phosphoribosyl 1-pyrophosphate   | 20775    | 16829    | 37517    | 86662    | 114344   | 87134    | 65575    |
| 6-phospho-D-gluconate              | 3910     | 2458     | 984      | 1949     | 2631     | 2681     | 1214     |
| acetyl-CoA-nega                    | 28681    | 24388    | 20893    | 29166    | 20711    | 20358    | 18661    |
| acetylphosphate                    | 2869     | 1323     | 1079     | 2105     | 2970     | 4549     | 11478    |
| aconitate                          | 11020    | 5053     | 5325     | 10810    | 12152    | 13561    | 13578    |
| ADP-nega                           | 6311     | 4450     | 5095     | 2648     | 2010     | 983      | 1088     |
| a-ketoglutarate                    | 7329     | 5154     | 5096     | 6114     | 8417     | 6901     | 5095     |
| alanine-CBZ                        | 574909   | 572571   | 546404   | 827697   | 870899   | 1052573  | 972467   |
| alanine-CBZ-C13N15-IS              | 545300   | 648365   | 583984   | 510748   | 554279   | 615785   | 504912   |
| AICAR                              | 100      | 100      | 1818     | 6558     | 7559     | 6020     | 4617     |
| arginine-CBZ                       | 4204     | 5531     | 9574     | 20791    | 25375    | 25492    | 12478    |
| Ascorbic acid                      | 37450    | 11993    | 11844    | 20132    | 39814    | 54451    | 74462    |
| asparagine-CBZ                     | 68018    | 96702    | 110295   | 158717   | 238271   | 296473   | 216620   |
| aspartate-CBZ                      | 216632   | 260322   | 411399   | 671206   | 975551   | 1213245  | 1204480  |
| ATP-nega                           | 90553    | 76195    | 74646    | 65782    | 36080    | 18406    | 14457    |
| carbamoyl-phosphate                | 589      | 574      | 471      | 899      | 616      | 258      | 100      |
| Citraconic acid                    | 10230    | 6819     | 6664     | 3873     | 2744     | 2489     | 2145     |
| citrate                            | 55299    | 46043    | 50514    | 94265    | 74403    | 64968    | 53577    |
| citrate/isocitrate                 | 493890   | 408476   | 480904   | 809996   | 661201   | 591465   | 449289   |
| citrulline-CBZ                     | 23312    | 27262    | 23224    | 17231    | 18549    | 30504    | 45637    |
| coenzyme A-nega                    | 3559     | 4892     | 7230     | 8467     | 6576     | 7293     | 4765     |
| CTP/UTP-nega-IS                    | 37826    | 59177    | 50233    | 39869    | 44008    | 42494    | 54687    |
| CTP-nega                           | 28046    | 24109    | 31509    | 33068    | 19970    | 13985    | 10572    |
| dATP-nega                          | 6107     | 7476     | 7243     | 6028     | 6393     | 4796     | 2641     |
| dCTP-nega                          | 4263     | 3539     | 4056     | 5922     | 3713     | 3468     | 2824     |
| D-erythrose-4-phosphate            | 2874     | 2913     | 3353     | 2309     | 2536     | 2409     | 3289     |
| dGDP                               | 8794     | 6321     | 4601     | 3002     | 1619     | 836      | 1457     |
| D-glucono-δ-lactone-6-phosphate    | 4112     | 4296     | 3097     | 3428     | 4112     | 4011     | 2585     |
| D-glyceraldehyde-3-phosphate       | 3372     | 2871     | 3628     | 3019     | 4727     | 6658     | 12330    |
| dihydroxy-acetone phosphate        | 3067     | 2569     | 4087     | 3913     | 5204     | 8180     | 12189    |
| D-sedoheptulose-7-phosphate        | 9788     | 6793     | 6739     | 7902     | 7267     | 9197     | 6138     |
| dTDP-nega                          | 1626     | 1255     | 855      | 407      | 414      | 305      | 276      |
| dTTP-nega                          | 28896    | 25528    | 25342    | 22396    | 16136    | 9690     | 10182    |
| dUMP-nega                          | 100      | 100      | 944      | 2199     | 1552     | 1194     | 1303     |
| fructose-1,6-bisphosphate          | 93187    | 101114   | 102347   | 92171    | 104293   | 132186   | 224526   |
| fructose-6-phosphate               | 2012     | 1609     | 1651     | 3359     | 2841     | 4261     | 4828     |
| geranyl-PP                         | 26317    | 27902    | 26907    | 25166    | 26196    | 29385    | 25544    |
| glucose-1-phosphate                | 1516     | 1329     | 1334     | 1240     | 2266     | 3409     | 2846     |
| glucose-6-phosphate                | 7376     | 4400     | 5293     | 5188     | 10226    | 13486    | 10516    |
| glutamate-CBZ                      | 11855970 | 13473630 | 13386013 | 13341201 | 14888630 | 15387416 | 13347140 |
| glutamate-CBZ-C13N15-IS            | 110393   | 111396   | 103585   | 79313    | 82075    | 94099    | 83088    |
| glutamine-CBZ                      | 634987   | 968715   | 948506   | 1277343  | 1755392  | 1882134  | 1372080  |

|                               |        |        |        |         |         |         |         |
|-------------------------------|--------|--------|--------|---------|---------|---------|---------|
| glutathione disulfide-nega    | 81272  | 77770  | 70058  | 71391   | 60062   | 30700   | 17853   |
| glutathione-nega              | 192052 | 154576 | 166955 | 148411  | 122837  | 81755   | 49221   |
| glycine-CBZ                   | 50010  | 38682  | 18958  | 6292    | 4851    | 5535    | 6262    |
| GTP-nega                      | 40080  | 33377  | 33695  | 25694   | 21267   | 19775   | 15237   |
| hexose-phosphate              | 19154  | 15581  | 15998  | 23254   | 31558   | 40585   | 43050   |
| histidine-CBZ                 | 12224  | 12317  | 12989  | 15496   | 7479    | 4797    | 3575    |
| homocysteine-MMTS             | 3031   | 2584   | 4858   | 39710   | 36907   | 43392   | 33073   |
| IDP-nega                      | 1614   | 725    | 1045   | 578     | 202     | 451     | 163     |
| Indoleacrylic acid            | 1892   | 1224   | 1936   | 1456    | 2228    | 1943    | 1696    |
| lactate                       | 10096  | 3930   | 4281   | 4037    | 4281    | 5857    | 3254    |
| leucine/isoleucine-CBZ        | 165332 | 151483 | 129343 | 269611  | 577335  | 805855  | 758083  |
| lysine-CBZ                    | 327312 | 456806 | 544224 | 1179693 | 2682760 | 3288799 | 3111280 |
| malate                        | 17040  | 14726  | 17235  | 27246   | 34565   | 44312   | 38050   |
| Maleic acid                   | 1178   | 1074   | 2125   | 917     | 1268    | 1025    | 1256    |
| methionine-CBZ                | 29776  | 31564  | 28109  | 13097   | 12922   | 14369   | 21965   |
| Methylmalonic acid            | 21441  | 17615  | 18258  | 21197   | 30288   | 34220   | 34969   |
| N-Acetyl-L-alanine            | 353    | 243    | 100    | 189     | 100     | 100     | 303     |
| NAD+_nega                     | 44492  | 40635  | 39258  | 45872   | 49654   | 59933   | 63295   |
| NADP+_nega                    | 28808  | 32150  | 25230  | 34715   | 28703   | 21450   | 17953   |
| NADPH_nega                    | 4884   | 3281   | 2597   | 2839    | 3661    | 4614    | 3019    |
| N-Carbamoyl-L-aspartate       | 1635   | 997    | 334    | 477     | 100     | 100     | 100     |
| ornithine-CBZ                 | 41192  | 56315  | 47743  | 30197   | 28985   | 57296   | 137987  |
| orotate                       | 18879  | 9177   | 5707   | 4661    | 3115    | 2483    | 1575    |
| pantothenate                  | 100    | 100    | 100    | 160     | 407     | 1468    | 1031    |
| phenylalanine-CBZ             | 1079   | 584    | 3414   | 6696    | 9178    | 18730   | 28025   |
| phenylpyruvate                | 592    | 163    | 631    | 1930    | 2285    | 6268    | 7390    |
| phosphoenolpyruvate           | 201    | 990    | 612    | 2455    | 3603    | 4798    | 5863    |
| p-hydroxybenzoate             | 1018   | 187    | 537    | 585     | 1008    | 867     | 891     |
| prephenate                    | 599    | 100    | 665    | 2056    | 3778    | 5939    | 7231    |
| proline-CBZ                   | 94444  | 60105  | 66628  | 54238   | 32476   | 21704   | 21564   |
| pyruvate                      | 10764  | 5499   | 6107   | 7446    | 10683   | 12903   | 14043   |
| quinolinate                   | 20599  | 19146  | 18407  | 22401   | 17144   | 16932   | 20283   |
| ribose-phosphate              | 7192   | 5451   | 6074   | 10558   | 13974   | 11875   | 9523    |
| S-adenosyl-L-methionine MMTS  | 3232   | 1338   | 2504   | 1455    | 273     | 1324    | 2624    |
| S-adenosyl-L-methionine pos   | 4990   | 1497   | 2874   | 1835    | 1090    | 656     | 4654    |
| serine-CBZ                    | 35389  | 35670  | 19350  | 19867   | 17977   | 18704   | 15649   |
| sn-glycerol-3-phosphate       | 3285   | 2510   | 2307   | 2620    | 1573    | 2472    | 2514    |
| S-ribosyl-L-homocysteine-nega | 1175   | 1073   | 1399   | 949     | 543     | 1503    | 1656    |
| succinate C12                 | 272    | 355    | 294    | 750     | 569     | 994     | 585     |
| threonine-CBZ                 | 109540 | 116588 | 148443 | 299689  | 284278  | 239884  | 193071  |
| threonine-CBZ-C13             | 9674   | 12716  | 10341  | 10223   | 11168   | 12186   | 9256    |
| trehalose 6-Phosphate         | 436    | 471    | 134    | 194     | 818     | 3822    | 5995    |
| trptophan-CBZ                 | 7979   | 6289   | 11237  | 18891   | 22097   | 28783   | 35600   |
| tyrosine-CBZ                  | 8451   | 5077   | 18697  | 52116   | 81952   | 109308  | 259939  |
| UDP-D-glucose                 | 165862 | 138846 | 136713 | 144530  | 160355  | 162983  | 132986  |
| UDP-D-glucuronate             | 78064  | 68164  | 83746  | 71114   | 51994   | 62631   | 54544   |
| UDP-N-acetyl-glucosamine      | 36574  | 31849  | 26506  | 28325   | 23020   | 24946   | 24239   |
| UDP-nega                      | 6138   | 3324   | 3966   | 2220    | 1947    | 1639    | 1443    |
| UTP-nega                      | 49834  | 40043  | 51550  | 50193   | 39036   | 36385   | 29138   |
| valine-CBZ                    | 387170 | 449118 | 433285 | 974096  | 1296242 | 1268128 | 584239  |

**Trimethoprim (4 µg/ml) + 0.3 mM thymine replicate 2 raw data**

| Time (min)                         | 0        | 1        | 5        | 15       | 30       | 60       | 120      |
|------------------------------------|----------|----------|----------|----------|----------|----------|----------|
| Optical density                    | 0.418    | 0.418    | 0.424    | 0.431    | 0.443    | 0.469    | 0.519    |
| 1,3-diphosphateglycerate           | 100      | 253      | 79       | 323      | 339      | 670      | 2823     |
| 2,3-dihydroxybenzoate              | 496      | 192      | 4651     | 15534    | 44016    | 107998   | 171689   |
| 2,3-Diphosphoglyceric acid         | 2064     | 1806     | 961      | 2445     | 4019     | 6184     | 13054    |
| 2-dehydro-D-gluconate              | 7734     | 6588     | 7220     | 6093     | 7755     | 7066     | 6496     |
| 2-Hydroxy-2-methylbutanedioic acid | 94352    | 36840    | 25860    | 25091    | 22692    | 20803    | 20362    |
| 2-Isopropylmalic acid              | 311023   | 233084   | 146428   | 55031    | 47467    | 57784    | 173910   |
| 2-keto-isovalerate                 | 1139     | 1113     | 1168     | 1713     | 1585     | 1923     | 966      |
| 3-phosphoglycerate                 | 3571     | 3683     | 3751     | 3307     | 4886     | 7263     | 9764     |
| 4-Pyridoxic acid                   | 3494     | 3517     | 3471     | 4433     | 3572     | 3665     | 4171     |
| 5-phosphoribosyl 1-pyrophosphate   | 18141    | 22181    | 36012    | 87219    | 115232   | 96344    | 68917    |
| 6-phospho-D-gluconate              | 2961     | 2496     | 1184     | 1321     | 2434     | 2699     | 1220     |
| acetyl-CoA-nega                    | 15566    | 13855    | 15832    | 12965    | 12794    | 11133    | 11824    |
| acetylphosphate                    | 1226     | 1064     | 1012     | 1753     | 1971     | 2548     | 5630     |
| aconitate                          | 10387    | 4879     | 5077     | 11480    | 12849    | 11834    | 13156    |
| ADP-nega                           | 5640     | 5374     | 3010     | 2592     | 1248     | 1036     | 546      |
| a-ketoglutarate                    | 7452     | 6860     | 5721     | 6988     | 9634     | 7179     | 6124     |
| alanine-CBZ                        | 550731   | 547680   | 490582   | 834200   | 989886   | 954524   | 849786   |
| alanine-CBZ-C13N15-IS              | 508224   | 598411   | 560511   | 509665   | 537421   | 495402   | 474827   |
| AICAR                              | 100      | 100      | 848      | 5495     | 8587     | 8232     | 3803     |
| arginine-CBZ                       | 3658     | 7036     | 8570     | 20467    | 24767    | 22083    | 12539    |
| Ascorbic acid                      | 27920    | 14877    | 10106    | 30640    | 39247    | 52648    | 69245    |
| asparagine-CBZ                     | 61081    | 86877    | 95929    | 153208   | 229624   | 213236   | 195217   |
| aspartate-CBZ                      | 188827   | 253150   | 323743   | 555349   | 837304   | 928228   | 1144565  |
| ATP-nega                           | 87144    | 102720   | 75101    | 70191    | 36786    | 24840    | 16570    |
| carbamoyl-phosphate                | 226      | 221      | 341      | 471      | 560      | 398      | 100      |
| Citraconic acid                    | 10101    | 7714     | 4588     | 3890     | 2844     | 2446     | 1561     |
| citrate                            | 46362    | 51595    | 45075    | 98787    | 85828    | 65610    | 49234    |
| citrate/isocitrate                 | 408957   | 431015   | 421739   | 818724   | 722009   | 621882   | 467542   |
| citrulline-CBZ                     | 19492    | 24806    | 19976    | 12687    | 16545    | 26810    | 44070    |
| coenzyme A-nega                    | 5731     | 6836     | 8672     | 10971    | 9260     | 10707    | 7518     |
| CTP/UTP-nega-IS                    | 46196    | 47457    | 37766    | 42839    | 50466    | 47903    | 51502    |
| CTP-nega                           | 25864    | 34432    | 31241    | 32555    | 23828    | 16738    | 8948     |
| dATP-nega                          | 5613     | 9623     | 7464     | 7236     | 6395     | 4846     | 3521     |
| dCTP-nega                          | 5184     | 6623     | 4958     | 5640     | 3542     | 4177     | 2755     |
| D-erythrose-4-phosphate            | 2531     | 2530     | 3689     | 3074     | 3281     | 2775     | 2993     |
| dGDP                               | 6161     | 5509     | 3322     | 2850     | 1894     | 1618     | 928      |
| D-glucono-δ-lactone-6-phosphate    | 2291     | 3529     | 3106     | 3045     | 2961     | 2523     | 2948     |
| D-glyceraldehyde-3-phosphate       | 1938     | 2080     | 2449     | 2899     | 4121     | 6275     | 11311    |
| dihydroxy-acetone phosphate        | 1467     | 2132     | 2888     | 3806     | 5184     | 5605     | 12281    |
| D-sedoheptulose-7-phosphate        | 8132     | 7696     | 6235     | 7715     | 6679     | 7823     | 6478     |
| dTDP-nega                          | 1640     | 881      | 914      | 355      | 844      | 504      | 384      |
| dTTP-nega                          | 30456    | 32088    | 27319    | 20474    | 14629    | 13303    | 10401    |
| dUMP-nega                          | 100      | 100      | 548      | 1999     | 2131     | 923      | 730      |
| fructose-1,6-bisphosphate          | 74184    | 111699   | 109357   | 87086    | 95249    | 134133   | 217794   |
| fructose-6-phosphate               | 2278     | 1757     | 1564     | 2349     | 2061     | 3805     | 4340     |
| geranyl-PP                         | 25380    | 24809    | 25598    | 25019    | 25658    | 25337    | 24693    |
| glucose-1-phosphate                | 1483     | 1834     | 1345     | 1841     | 1876     | 2407     | 2159     |
| glucose-6-phosphate                | 5949     | 5436     | 3675     | 6371     | 8173     | 9602     | 10853    |
| glutamate-CBZ                      | 10931208 | 12550818 | 12342542 | 13080191 | 14383218 | 13225283 | 12700362 |
| glutamate-CBZ-C13N15-IS            | 98317    | 92809    | 96361    | 84138    | 87149    | 83550    | 88431    |
| glutamine-CBZ                      | 609476   | 899602   | 971146   | 1282378  | 1758483  | 1606659  | 1195374  |

|                               |        |        |        |         |         |         |         |
|-------------------------------|--------|--------|--------|---------|---------|---------|---------|
| glutathione disulfide-nega    | 154937 | 178378 | 175324 | 149444  | 123094  | 62116   | 33388   |
| glutathione-nega              | 42491  | 52123  | 42528  | 47259   | 30374   | 35307   | 17765   |
| glycine-CBZ                   | 43270  | 47941  | 27198  | 3763    | 2845    | 4208    | 5259    |
| GTP-nega                      | 37566  | 39515  | 34868  | 27340   | 23473   | 25165   | 19754   |
| hexose-phosphate              | 16673  | 16436  | 15981  | 18487   | 28088   | 31789   | 38114   |
| histidine-CBZ                 | 10119  | 12955  | 18539  | 8140    | 4226    | 4102    | 3325    |
| homocysteine-MMTS             | 4350   | 1885   | 3505   | 29048   | 31483   | 29406   |         |
| IDP-nega                      | 963    | 1476   | 887    | 326     | 102     | 185     | 115     |
| Indoleacrylic acid            | 1403   | 1359   | 1867   | 2099    | 1634    | 1705    | 1550    |
| lactate                       | 8518   | 5096   | 2938   | 4818    | 4909    | 5314    | 5443    |
| leucine/isoleucine-CBZ        | 139850 | 138818 | 110380 | 260419  | 574460  | 811982  | 682184  |
| lysine-CBZ                    | 278594 | 471183 | 519174 | 1258795 | 2701546 | 2787737 | 3085092 |
| malate                        | 14788  | 18774  | 15132  | 27884   | 39192   | 42576   | 40068   |
| Maleic acid                   | 1425   | 1964   | 1231   | 1867    | 1017    | 2135    | 875     |
| methionine-CBZ                | 27603  | 32061  | 25334  | 11846   | 8793    | 11554   | 17697   |
| Methylmalonic acid            | 22049  | 20444  | 20339  | 24124   | 31602   | 40203   | 44048   |
| N-Acetyl-L-alanine            | 280    | 260    | 347    | 137     | 135     | 100     | 107     |
| NAD+_nega                     | 40116  | 49504  | 51731  | 58531   | 66973   | 67659   | 71551   |
| NADP+_nega                    | 26516  | 34465  | 29498  | 36186   | 30082   | 31918   | 22397   |
| NADPH_nega                    | 4034   | 2799   | 3698   | 3136    | 5479    | 2306    | 3299    |
| N-Carbamoyl-L-aspartate       | 1564   | 2216   | 512    | 416     | 637     | 259     | 100     |
| ornithine-CBZ                 | 39942  | 61216  | 123255 | 25801   | 28313   | 40256   | 126433  |
| orotate                       | 21415  | 11030  | 6765   | 4245    | 3088    | 1472    | 1855    |
| pantothenate                  | 100    | 100    | 100    | 100     | 902     | 1177    | 1500    |
| phenylalanine-CBZ             | 897    | 1009   | 2773   | 7073    | 8966    | 16442   | 25896   |
| phenylpyruvate                | 728    | 100    | 100    | 1514    | 3337    | 6039    | 8284    |
| phosphoenolpyruvate           | 702    | 591    | 1376   | 1718    | 3521    | 4472    | 7019    |
| p-hydroxybenzoate             | 1320   | 520    | 415    | 827     | 948     | 1336    | 2206    |
| prephenate                    | 536    | 154    | 509    | 2062    | 4776    | 5734    | 10431   |
| proline-CBZ                   | 87557  | 71008  | 61130  | 45663   | 30758   | 21619   | 20575   |
| pyruvate                      | 11457  | 5691   | 5879   | 8444    | 8778    | 12899   | 14669   |
| quinolinate                   | 16751  | 18614  | 18111  | 20134   | 21996   | 18718   | 18375   |
| ribose-phosphate              | 6189   | 5364   | 4662   | 8468    | 12467   | 11359   | 9824    |
| S-adenosyl-L-methionine MMTS  | 1610   | 1195   | 1597   | 230     | 550     | 735     |         |
| S-adenosyl-L-methionine pos   | 2895   | 703    | 2477   | 574     | 100     | 868     | 3183    |
| serine-CBZ                    | 27894  | 35824  | 39645  | 11513   | 12412   | 13369   | 13049   |
| sn-glycerol-3-phosphate       | 2060   | 2403   | 2025   | 2217    | 1809    | 2429    | 2833    |
| S-ribosyl-L-homocysteine-nega | 1178   | 1163   | 1575   | 337     | 437     | 865     | 1085    |
| succinate C12                 | 397    | 288    | 399    | 597     | 1012    | 827     | 1379    |
| threonine-CBZ                 | 85067  | 112919 | 137005 | 245138  | 243760  | 199403  | 161058  |
| threonine-CBZ-C13             | 8798   | 11736  | 8771   | 11010   | 9939    | 9315    | 9181    |
| trehalose 6-Phosphate         | 235    | 100    | 100    | 312     | 953     | 3433    | 5019    |
| trptophan-CBZ                 | 6967   | 6664   | 10631  | 16913   | 19279   | 26585   | 35955   |
| tyrosine-CBZ                  | 9315   | 5747   | 22220  | 69495   | 78260   | 201190  | 276597  |
| UDP-D-glucose                 | 146750 | 165472 | 146493 | 162514  | 173441  | 182705  | 145299  |
| UDP-D-glucuronate             | 70487  | 87380  | 87851  | 87282   | 77850   | 69890   | 58724   |
| UDP-N-acetyl-glucosamine      | 35959  | 36180  | 31594  | 28834   | 31967   | 27159   | 27825   |
| UDP-nega                      | 4006   | 4706   | 2853   | 1571    | 2860    | 2283    | 1838    |
| UTP-nega                      | 47774  | 47006  | 50317  | 47544   | 40156   | 43535   | 34127   |
| valine-CBZ                    | 327712 | 421615 | 386892 | 969367  | 1225059 | 1041079 | 571059  |

**Trimethoprim (4 µg/ml) + 0.3 mM methionine replicate 1 raw data**

| Time (min)                       | 0       | 1       | 5        | 15       | 30       | 60       | 120      |
|----------------------------------|---------|---------|----------|----------|----------|----------|----------|
| Optical density                  | 0.560   | 0.560   | 0.562    | 0.563    | 0.567    | 0.574    | 0.588    |
| 1,3-diphosphateglycerate         | 6232    | 3821    | 3514     | 3558     | 3195     | 3602     | 5829     |
| 2,3-dihydroxybenzoate            | 5705    | 5577    | 267671   | 468035   | 427043   | 362578   | 469299   |
| 2,3-Diphosphoglyceric acid       | 30023   | 20671   | 17637    | 15342    | 17571    | 18205    | 28066    |
| 2-Isopropylmalic acid            | 199718  | 178969  | 30083    | 19951    | 18105    | 19783    | 26851    |
| 2-oxo-4-methylthiobutanoate      | 2239    | 3049    | 710      | 383      | 353      | 244      | 191      |
| 3-phosphoglycerate               | 14588   | 16105   | 12153    | 11751    | 11112    | 14280    | 21905    |
| 5-phosphoribosyl 1-pyrophosphate | 22044   | 27469   | 56986    | 42986    | 37006    | 44485    | 75402    |
| acetyl-CoA-nega                  | 19556   | 19877   | 20460    | 18345    | 22655    | 27872    | 25116    |
| 6-phospho-D-gluconate            | 13810   | 9465    | 3876     | 2044     | 1216     | 2026     | 1587     |
| acetylphosphate                  | 3073    | 2068    | 2142     | 2801     | 3701     | 7983     | 9264     |
| aconitate                        | 7823    | 7714    | 6477     | 7376     | 4874     | 6467     | 4952     |
| ADP-D-glucose                    | 899     | 379     | 2043     | 2275     | 1022     | 1829     | 1217     |
| ADP-nega                         | 3583    | 4364    | 3258     | 2320     | 2300     | 2231     | 1457     |
| a-ketoglutarate                  | 12349   | 12238   | 13081    | 12845    | 9542     | 9963     | 6183     |
| alanine-CBZ                      | 226706  | 237404  | 766289   | 1240956  | 981917   | 951475   | 888335   |
| alanine-CBZ-C13N15-IS            | 617968  | 554513  | 516359   | 433786   | 385228   | 333164   | 340306   |
| AICAR                            | 100     | 100     | 1661     | 506      | 820      | 647      | 1142     |
| arginine-CBZ                     | 5671    | 7247    | 32185    | 61857    | 78206    | 107966   | 94967    |
| Ascorbic acid                    | 664     | 504     | 556      | 4098     | 6614     | 9087     | 22549    |
| asparagine-CBZ                   | 105860  | 123151  | 208783   | 278590   | 380213   | 430447   | 516182   |
| aspartate-CBZ                    | 249931  | 340488  | 888510   | 1095271  | 1242660  | 1434020  | 1788219  |
| ATP-nega                         | 176845  | 166845  | 178220   | 153891   | 134839   | 124171   | 89245    |
| citrate/isocitrate               | 423237  | 532897  | 644587   | 444666   | 422189   | 342203   | 462088   |
| citrulline-CBZ                   | 22149   | 23130   | 8866     | 8428     | 9097     | 8326     | 9145     |
| coenzyme A-nega                  | 111     | 281     | 1028     | 1096     | 1242     | 1295     | 3192     |
| CTP/UTP-nega-IS                  | 79164   | 82371   | 83989    | 85188    | 83607    | 85398    | 81155    |
| CTP-nega                         | 63527   | 64951   | 92959    | 64809    | 57728    | 59274    | 45907    |
| dATP-nega                        | 14232   | 15325   | 13107    | 15559    | 19971    | 16471    | 10695    |
| dCTP-nega                        | 11541   | 13889   | 14877    | 12582    | 11224    | 10330    | 7269     |
| dGDP                             | 3577    | 3440    | 3256     | 2037     | 1846     | 1156     | 1357     |
| D-glucono-δ-lactone-6-phosphate  | 5140    | 6989    | 4567     | 5481     | 5475     | 5412     | 5084     |
| D-glyceraldehyde-3-phosphate     | 345     | 304     | 308      | 558      | 605      | 1130     | 670      |
| dihydroorotate                   | 797     | 1255    | 110      | 119      | 107      | 100      | 126      |
| dihydroxy-acetone phosphate      | 220     | 327     | 430      | 327      | 506      | 436      | 745      |
| D-sedoheptulose-7-phosphate      | 3142    | 2381    | 3046     | 2593     | 2974     | 2577     | 4486     |
| dTTP-nega                        | 29432   | 36024   | 23848    | 6407     | 5624     | 1143     | 1512     |
| dUMP-nega                        | 100     | 100     | 3592     | 5158     | 4310     | 4434     | 4148     |
| fructose-1,6-bisphosphate        | 59816   | 96576   | 121439   | 101939   | 77510    | 50385    | 79436    |
| fructose-6-phosphate             | 1306    | 1670    | 1555     | 1693     | 1446     | 1506     | 2982     |
| geranyl-PP                       | 12957   | 13874   | 11485    | 12809    | 13490    | 11983    | 12353    |
| glucose-1-phosphate              | 175     | 223     | 100      | 190      | 124      | 210      | 100      |
| glucose-6-phosphate              | 3629    | 3568    | 3628     | 2742     | 4092     | 3980     | 5675     |
| glutamate-CBZ                    | 8449370 | 9312528 | 10956352 | 14264948 | 15970662 | 16298036 | 15004787 |
| glutamate-CBZ-C13N15-IS          | 184210  | 177437  | 126266   | 125786   | 125621   | 115313   | 118706   |
| glutamine-CBZ                    | 529174  | 585018  | 1126789  | 1250309  | 1535964  | 1545130  | 1514838  |
| glutathione disulfide-nega       | 41568   | 42611   | 45688    | 28497    | 24531    | 11794    | 8539     |
| glutathione-nega                 | 50343   | 63716   | 51830    | 53303    | 57327    | 45367    | 47545    |
| glycine-CBZ                      | 32631   | 16715   | 2067     | 1720     | 1910     | 2561     | 2776     |
| GTP-nega                         | 97516   | 98611   | 42796    | 53159    | 48508    | 52021    | 50920    |
| hexose-phosphate                 | 12496   | 11702   | 13510    | 12459    | 11771    | 15285    | 21099    |
| histidine-CBZ                    | 13439   | 14758   | 72920    | 47790    | 13002    | 14001    | 16202    |

|                               |         |         |         |         |         |         |         |
|-------------------------------|---------|---------|---------|---------|---------|---------|---------|
| homocysteine-MMTS             | 22620   | 21275   | 19203   | 15205   | 22525   | 16809   | 25398   |
| Indoleacrylic acid            | 3050    | 3558    | 4152    | 2841    | 3253    | 3968    | 3242    |
| leucine/isoleucine-CBZ        | 48134   | 54889   | 250825  | 368893  | 365761  | 454065  | 450604  |
| lysine-CBZ                    | 204505  | 232313  | 732701  | 1557215 | 2389638 | 2678729 | 3088513 |
| malate                        | 127     | 188     | 145     | 153     | 326     | 196     | 100     |
| Maleic acid                   | 2707    | 2771    | 3057    | 1649    | 3335    | 3271    | 2620    |
| methionine-CBZ                | 6099652 | 6851232 | 6852053 | 6945331 | 7069392 | 6844121 | 7007906 |
| NAD+_nega                     | 27300   | 36229   | 41651   | 44107   | 51993   | 64937   | 79804   |
| NADP+_nega                    | 23569   | 31266   | 38097   | 38108   | 26395   | 23336   | 21960   |
| NADPH_nega                    | 5241    | 6599    | 5944    | 6581    | 5373    | 7248    | 6862    |
| N-Carbamoyl-L-aspartate       | 28100   | 26045   | 506     | 2758    | 3090    | 2452    | 1562    |
| ornithine-CBZ                 | 17061   | 14566   | 6423    | 8160    | 9033    | 10017   | 10128   |
| orotate                       | 21284   | 11433   | 4337    | 6079    | 7786    | 7872    | 4436    |
| phenylalanine-CBZ             | 272     | 341     | 18106   | 25178   | 23841   | 29340   | 31817   |
| phenylpyruvate                | 1075    | 427     | 5250    | 7432    | 10228   | 11538   | 16322   |
| phosphoenolpyruvate           | 1860    | 2294    | 3435    | 5689    | 5662    | 8095    | 14506   |
| p-hydroxybenzoate             | 746     | 616     | 648     | 967     | 1008    | 1121    | 1639    |
| prephenate                    | 130     | 100     | 4814    | 7948    | 7809    | 12460   | 14034   |
| proline-CBZ                   | 76119   | 78421   | 65189   | 66428   | 62283   | 67386   | 58468   |
| pyruvate                      | 1051    | 1392    | 2464    | 4509    | 5658    | 7640    | 9978    |
| quinolinate                   | 26607   | 22569   | 23241   | 23050   | 22749   | 22825   | 20381   |
| ribose-phosphate              | 4906    | 4361    | 4568    | 3217    | 3910    | 3875    | 5118    |
| S-adenosyl-L-methionine MMTS  | 6714    | 4366    | 4372    | 5208    | 4400    | 5611    | 6134    |
| serine-CBZ                    | 44511   | 31638   | 14207   | 18069   | 22696   | 33779   | 50255   |
| sn-glycerol-3-phosphate       | 404     | 297     | 257     | 264     | 160     | 286     | 263     |
| S-ribosyl-L-homocysteine-nega | 1039    | 431     | 746     | 681     | 1253    | 830     | 167     |
| succinate C12                 | 100     | 100     | 100     | 100     | 100     | 100     | 100     |
| threonine-CBZ                 | 108892  | 106378  | 198700  | 234361  | 224863  | 222163  | 192152  |
| trptophan-CBZ                 | 3970    | 3442    | 38387   | 35309   | 34966   | 35645   | 34738   |
| tyrosine-CBZ                  | 3482    | 5374    | 222832  | 350370  | 375726  | 376307  | 397048  |
| UDP-D-glucose                 | 141781  | 121812  | 88166   | 82742   | 101957  | 135828  | 200490  |
| UDP-D-glucuronate             | 85813   | 121514  | 121653  | 124013  | 99411   | 127976  | 109040  |
| UDP-N-acetyl-glucosamine      | 30216   | 36544   | 32050   | 33202   | 31841   | 26726   | 25853   |
| uracil                        | 100     | 100     | 253     | 652     | 784     | 841     | 1550    |
| UTP-nega                      | 98222   | 111514  | 138447  | 116152  | 114553  | 117530  | 88559   |
| valine-CBZ                    | 57429   | 83746   | 1164638 | 2352877 | 2056158 | 1914005 | 1632131 |



**Trimethoprim (4 µg/ml) + 0.3 mM methionine replicate 2 raw data**

| Time (min)                       | 0       | 1       | 5        | 15       | 30       | 60       | 120      |
|----------------------------------|---------|---------|----------|----------|----------|----------|----------|
| Optical density                  | 0.560   | 0.560   | 0.562    | 0.563    | 0.567    | 0.574    | 0.588    |
| 1,3-diphosphateglycerate         | 504     | 378     | 229      | 277      | 913      | 1028     | 2299     |
| 2,3-dihydroxybenzoate            | 602     | 329     | 24069    | 38530    | 34572    | 34249    | 47067    |
| 2,3-Diphosphoglyceric acid       | 3417    | 4532    | 3272     | 4179     | 3917     | 6913     | 7204     |
| 2-Isopropylmalic acid            | 171600  | 131491  | 22379    | 14288    | 13839    | 14065    | 18362    |
| 2-oxo-4-methylthiobutanoate      | 2618    | 2266    | 1540     | 555      | 700      | 592      | 181      |
| 3-phosphoglycerate               | 14845   | 16286   | 14042    | 14166    | 16737    | 19249    | 25907    |
| 5-phosphoribosyl 1-pyrophosphate | 14219   | 15920   | 26080    | 20136    | 17252    | 35431    | 39566    |
| acetyl-CoA-nega                  | 2329    | 2519    | 2768     | 2465     | 3996     | 4210     | 5797     |
| 6-phospho-D-gluconate            | 8946    | 7221    | 2875     | 1309     | 439      | 1227     | 1146     |
| aconitate                        | 8139    | 9472    | 8122     | 8659     | 7418     | 8076     | 7760     |
| ADP-D-glucose                    | 1241    | 816     | 553      | 1606     | 1352     | 1139     | 1352     |
| ADP-nega                         | 2438    | 1781    | 1478     | 737      | 1558     | 1031     | 708      |
| a-ketoglutarate                  | 21800   | 18071   | 14436    | 11114    | 12709    | 12481    | 9428     |
| alanine-CBZ                      | 242811  | 168256  | 790072   | 1051196  | 1057730  | 654810   | 1017277  |
| alanine-CBZ-C13N15-IS            | 603964  | 431081  | 565267   | 390954   | 413511   | 257824   | 406975   |
| AICAR                            | 100     | 100     | 1195     | 754      | 1008     | 1451     | 1676     |
| arginine-CBZ                     | 8560    | 7804    | 36921    | 58440    | 70974    | 92034    | 84684    |
| Ascorbic acid                    | 1366    | 481     | 1848     | 6683     | 9711     | 16345    | 30134    |
| asparagine-CBZ                   | 136306  | 135092  | 243833   | 299408   | 335066   | 452672   | 416013   |
| aspartate-CBZ                    | 315867  | 345173  | 940249   | 995827   | 1111258  | 1322418  | 1527332  |
| ATP-nega                         | 84974   | 80420   | 67196    | 57552    | 50694    | 54123    | 37835    |
| citrate/isocitrate               | 143244  | 158596  | 168445   | 124524   | 119331   | 97104    | 115104   |
| citrulline-CBZ                   | 25477   | 23293   | 12894    | 9775     | 7961     | 10095    | 9196     |
| coenzyme A-nega                  | 359     | 669     | 734      | 1719     | 1328     | 1987     | 2805     |
| CTP/UTP-nega-IS                  | 35834   | 37403   | 37986    | 42245    | 39656    | 38141    | 33906    |
| CTP-nega                         | 25033   | 26089   | 27119    | 22507    | 21518    | 22575    | 19723    |
| dATP-nega                        | 7690    | 5822    | 5250     | 5941     | 7028     | 8943     | 4605     |
| dCTP-nega                        | 5095    | 4722    | 5121     | 4187     | 3935     | 3313     | 2649     |
| dGDP                             | 2216    | 1767    | 2385     | 1160     | 1165     | 1264     | 780      |
| D-glucono-δ-lactone-6-phosphate  | 4193    | 4999    | 3332     | 4763     | 4457     | 3882     | 4171     |
| D-glyceraldehyde-3-phosphate     | 6600    | 7278    | 10445    | 10755    | 9587     | 9416     | 13447    |
| dihydroorotate                   | 6280    | 3773    | 151      | 2066     | 1991     | 916      | 251      |
| dihydroxy-acetone phosphate      | 7461    | 7750    | 11995    | 10255    | 11086    | 11123    | 12306    |
| D-sedoheptulose-7-phosphate      | 4898    | 2065    | 3689     | 2462     | 3283     | 3091     | 4992     |
| dTTP-nega                        | 17674   | 15664   | 9497     | 3325     | 1485     | 532      | 721      |
| dUMP-nega                        | 100     | 660     | 12249    | 14033    | 14607    | 17842    | 10932    |
| fructose-1,6-bisphosphate        | 12577   | 17170   | 19579    | 16556    | 13798    | 13423    | 15550    |
| fructose-6-phosphate             | 507     | 1055    | 904      | 746      | 810      | 1301     | 1956     |
| geranyl-PP                       | 13557   | 13154   | 13163    | 12734    | 12656    | 12817    | 13578    |
| glucose-1-phosphate              | 1809    | 1349    | 1505     | 1632     | 1768     | 1259     | 2600     |
| glucose-6-phosphate              | 793     | 975     | 822      | 1116     | 656      | 742      | 626      |
| glutamate-CBZ                    | 9014234 | 9290443 | 10981384 | 13273380 | 14216460 | 14462832 | 14438196 |
| glutamate-CBZ-C13N15-IS          | 226392  | 220456  | 135558   | 150228   | 141052   | 125639   | 122385   |
| glutamine-CBZ                    | 575167  | 652070  | 1186493  | 1261004  | 1331239  | 1521836  | 1302124  |
| glutathione disulfide-nega       | 100134  | 94234   | 88412    | 55739    | 37402    | 26369    | 13425    |
| glutathione-nega                 | 68992   | 56514   | 74786    | 93211    | 92645    | 89260    | 84470    |
| glycine-CBZ                      | 38412   | 13274   | 3298     | 1452     | 2945     | 2241     | 1394     |
| GTP-nega                         | 37010   | 32530   | 12127    | 15690    | 15098    | 22754    | 16186    |
| hexose-phosphate                 | 7502    | 7091    | 9220     | 9676     | 9635     | 9978     | 14124    |
| histidine-CBZ                    | 13439   | 14554   | 67182    | 38201    | 12605    | 7088     | 12917    |
| homocysteine-MMTS                | 24256   | 15315   | 19774    | 18045    | 19317    | 10770    | 18246    |

|                               |         |         |         |         |         |         |         |
|-------------------------------|---------|---------|---------|---------|---------|---------|---------|
| Indoleacrylic acid            | 1924    | 1553    | 1911    | 1645    | 1759    | 1736    | 1101    |
| leucine/isoleucine-CBZ        | 62500   | 58162   | 251340  | 344385  | 338008  | 419791  | 384853  |
| lysine-CBZ                    | 288188  | 290640  | 981661  | 1820617 | 2276850 | 2477173 | 2961156 |
| malate                        | 39898   | 34207   | 30342   | 27317   | 29825   | 29792   | 36555   |
| Maleic acid                   | 2563    | 3222    | 3783    | 3175    | 3023    | 3210    | 2918    |
| methionine-CBZ                | 6350228 | 6470275 | 6903765 | 5894888 | 6256065 | 6118267 | 6231394 |
| NAD+_nega                     | 39540   | 38818   | 39027   | 41809   | 50937   | 59573   | 67102   |
| NADP+_nega                    | 11512   | 13285   | 15863   | 14822   | 15338   | 10939   | 10733   |
| NADPH_nega                    | 2343    | 1397    | 1393    | 1254    | 1156    | 2506    | 1964    |
| N-Carbamoyl-L-aspartate       | 11760   | 11563   | 518     | 1192    | 1421    | 1710    | 563     |
| ornithine-CBZ                 | 23414   | 24772   | 11854   | 8310    | 13974   | 7751    | 9409    |
| orotate                       | 23259   | 13805   | 3910    | 3887    | 6266    | 7149    | 6646    |
| phenylalanine-CBZ             | 261     | 161     | 14621   | 21125   | 23445   | 26640   | 30180   |
| phenylpyruvate                | 1222    | 413     | 6260    | 7892    | 12620   | 11077   | 18811   |
| phosphoenolpyruvate           | 714     | 1680    | 2801    | 2904    | 4008    | 6717    | 8444    |
| p-hydroxybenzoate             | 1358    | 364     | 938     | 815     | 1186    | 1532    | 2080    |
| prephenate                    | 161     | 300     | 6107    | 9496    | 9888    | 14727   | 14560   |
| proline-CBZ                   | 79571   | 64019   | 53526   | 51831   | 58652   | 51299   | 54277   |
| pyruvate                      | 2945    | 1115    | 2469    | 5130    | 5915    | 7378    | 10610   |
| quinolinate                   | 16585   | 18204   | 18469   | 19447   | 17907   | 18595   | 18812   |
| ribose-phosphate              | 9013    | 8200    | 10707   | 6731    | 5505    | 5382    | 8412    |
| S-adenosyl-L-methionine MMTS  | 6385    | 3130    | 3232    | 4196    | 4417    | 4927    | 4227    |
| serine-CBZ                    | 49348   | 34076   | 19780   | 14609   | 24298   | 27667   | 34728   |
| sn-glycerol-3-phosphate       | 4869    | 3392    | 2349    | 2584    | 2106    | 2091    | 2711    |
| S-ribosyl-L-homocysteine-nega | 733     | 357     | 1062    | 981     | 479     | 182     | 345     |
| succinate C12                 | 1098    | 773     | 1228    | 511     | 628     | 802     | 542     |
| threonine-CBZ                 | 118324  | 99819   | 198460  | 214858  | 203094  | 183543  | 163728  |
| trptophan-CBZ                 | 3941    | 4023    | 31233   | 32315   | 31506   | 26193   | 29426   |
| tyrosine-CBZ                  | 4115    | 4508    | 206018  | 278347  | 319329  | 298526  | 410689  |
| UDP-D-glucose                 | 270895  | 249540  | 177592  | 171863  | 209289  | 298934  | 330021  |
| UDP-D-glucuronate             | 78735   | 80246   | 75592   | 68448   | 83384   | 78062   | 90343   |
| UDP-N-acetyl-glucosamine      | 58156   | 51995   | 41723   | 47503   | 49019   | 52591   | 44588   |
| uracil                        | 100     | 100     | 498     | 1130    | 1012    | 1367    | 1003    |
| UTP-nega                      | 45596   | 39156   | 51945   | 47164   | 38739   | 49718   | 45034   |
| valine-CBZ                    | 81782   | 83648   | 1189949 | 2154140 | 1867910 | 1730119 | 1423238 |

**Trimethoprim (4 µg/ml) + 0.3 mM inosine replicate 1 raw data**

| Time (min)                         | 0       | 1       | 5       | 15      | 30       | 60       | 120      |
|------------------------------------|---------|---------|---------|---------|----------|----------|----------|
| Optical density                    | 0.591   | 0.658   | 0.641   | 0.650   | 0.593    | 0.725    | 0.942    |
| 1,3-diphosphateglycerate           | 100     | 194     | 83      | 668     | 200      | 989      | 460      |
| 2,3-dihydroxybenzoate              | 1315    | 1315    | 32933   | 123599  | 136382   | 125491   | 76911    |
| 2,3-Diphosphoglyceric acid         | 1774    | 1774    | 1837    | 4702    | 2433     | 3499     | 2737     |
| 2-Hydroxy-2-methylbutanedioic acid | 37696   | 37696   | 16825   | 10635   | 11561    | 11548    | 18785    |
| 2-Isopropylmalic acid              | 75306   | 75306   | 16608   | 8214    | 9997     | 13434    | 19345    |
| 3-phosphoglycerate                 | 2675    | 2675    | 1431    | 1933    | 1418     | 2032     | 3265     |
| 5-phosphoribosyl 1-pyrophosphate   | 9788    | 9788    | 16793   | 31783   | 11747    | 17225    | 4886     |
| 6-phospho-D-gluconate              | 4301    | 4301    | 674     | 221     | 28       | 185      | 251      |
| acetyl-CoA-nega                    | 10315   | 13415   | 7562    | 10792   | 13066    | 13739    | 19405    |
| acetylphosphate                    | 3580    | 2091    | 1860    | 2054    | 2688     | 4834     | 4217     |
| aconitate                          | 2920    | 1234    | 2476    | 1432    | 1658     | 1827     | 2748     |
| ADP-nega                           | 2268    | 2075    | 1092    | 1012    | 1261     | 1927     | 2271     |
| a-ketoglutarate                    | 7220    | 7096    | 5784    | 6273    | 6378     | 7430     | 9117     |
| alanine-CBZ                        | 197195  | 226843  | 589294  | 905314  | 845252   | 663514   | 257176   |
| AICAR                              | 100     | 100     | 100     | 326     | 937      | 1773     | 3020     |
| arginine-CBZ                       | 3169    | 2943    | 17006   | 23193   | 27445    | 22610    | 23406    |
| asparagine-CBZ                     | 29596   | 33772   | 86924   | 95715   | 110764   | 94713    | 100013   |
| aspartate-CBZ                      | 154520  | 175149  | 510249  | 521519  | 590037   | 458260   | 364033   |
| ATP-nega                           | 67474   | 67474   | 58523   | 50624   | 40802    | 63238    | 85059    |
| citrate-isocitrate                 | 78072   | 78072   | 53389   | 31590   | 18089    | 36368    | 29747    |
| citrulline-CBZ                     | 13416   | 14454   | 7548    | 8555    | 10295    | 16655    | 27649    |
| coenzyme A-nega                    | 1231    | 1231    | 3521    | 4963    | 5800     | 6518     | 7737     |
| CTP-nega                           | 16253   | 16253   | 33508   | 31644   | 22299    | 29240    | 47861    |
| dATP-nega                          | 3911    | 5819    | 3653    | 6154    | 6871     | 8173     | 8431     |
| dCTP-nega                          | 3516    | 3516    | 6118    | 5173    | 2728     | 4488     | 3309     |
| D-erythrose-4-phosphate            | 394     | 462     | 365     | 438     | 361      | 643      | 606      |
| D-glucono-δ-lactone-6-phosphate    | 483     | 874     | 643     | 362     | 259      | 723      | 405      |
| D-glyceraldehyde-3-phosphate       | 17      | 348     | 487     | 555     | 428      | 274      | 569      |
| dihydroxy-acetone phosphate        | 3878    | 5919    | 6593    | 6003    | 5026     | 5059     | 5824     |
| D-sedoheptulose-7-phosphate        | 3178    | 3368    | 3011    | 1971    | 2129     | 1580     | 1457     |
| dTTP-nega                          | 7881    | 9484    | 3410    | 858     | 100      | 100      | 100      |
| dUMP-nega                          | 100     | 154     | 4242    | 4678    | 5645     | 5115     | 5333     |
| fructose-1,6-bisphosphate          | 32267   | 48616   | 25517   | 26361   | 9874     | 19176    | 6706     |
| glucose-6-phosphate                | 2393    | 3899    | 2668    | 2397    | 2275     | 1965     | 2049     |
| glutamate-CBZ                      | 7101702 | 7300401 | 8962110 | 9492721 | 10305719 | 10471709 | 10865106 |
| glutamine-CBZ                      | 314834  | 291437  | 597628  | 556149  | 579279   | 578229   | 539470   |
| glutathione disulfide-nega         | 23515   | 23515   | 24592   | 16481   | 15149    | 12044    | 9170     |
| glycine-CBZ                        | 12107   | 7643    | 1640    | 2774    | 5231     | 2340     | 113644   |
| GTP-nega                           | 35401   | 35401   | 19531   | 29707   | 22592    | 32306    | 35144    |
| hexose-phosphate                   | 11173   | 11173   | 7944    | 9192    | 6268     | 8738     | 6617     |
| histidine-CBZ                      | 7996    | 7608    | 14433   | 8561    | 10072    | 6501     | 7301     |
| homocysteine-MMTS                  | 158     | 359     | 1023    | 5064    | 7656     | 7658     | 4527     |
| hypoxanthine                       | 24330   | 14554   | 23911   | 31789   | 41912    | 39807    | 37582    |
| inosine                            | 259139  | 383786  | 384121  | 329952  | 340312   | 295124   | 311849   |
| leucine-isoleucine-CBZ             | 37794   | 37637   | 97410   | 171094  | 181424   | 145480   | 1091039  |
| lysine-CBZ                         | 108898  | 120395  | 397662  | 926583  | 1192395  | 1327433  | 1851494  |
| malate                             | 44861   | 28370   | 23041   | 18178   | 19559    | 20078    | 25058    |
| methionine-CBZ                     | 16265   | 12486   | 9517    | 1973    | 1780     | 1064     | 1014     |
| methylnicotinamide                 | 7332    | 5386    | 5319    | 4421    | 4476     | 3410     | 3926     |
| NAD+_nega                          | 23239   | 23239   | 26765   | 32342   | 33023    | 43240    | 62228    |
| NADP+_nega                         | 8771    | 11136   | 11608   | 11941   | 14453    | 14449    | 19876    |

|                            |        |        |        |         |         |         |        |
|----------------------------|--------|--------|--------|---------|---------|---------|--------|
| NADPH_nega                 | 4013   | 2129   | 2398   | 3036    | 2822    | 3865    | 4758   |
| N-Carbamoyl-L-aspartate    | 23931  | 23931  | 2535   | 2303    | 4155    | 5856    | 5905   |
| ornithine-CBZ              | 12699  | 13225  | 8546   | 11332   | 16962   | 16796   | 26700  |
| pantothenate               | 100    | 113    | 243    | 381     | 985     | 306     | 100    |
| phenylalanine-CBZ          | 933    | 715    | 3458   | 5177    | 6142    | 4203    | 2523   |
| phenylpyruvate             | 1745   | 995    | 2143   | 3137    | 3563    | 3742    | 5946   |
| phosphoenolpyruvate        | 946    | 946    | 1379   | 1532    | 1609    | 2090    | 2249   |
| prephenate                 | 341    | 253    | 1023   | 2425    | 2941    | 2527    | 3241   |
| proline-CBZ                | 66166  | 55104  | 35498  | 34376   | 38623   | 69476   | 143192 |
| Pyrophosphate              | 3278   | 3087   | 1870   | 3576    | 1461    | 4980    | 2074   |
| pyruvate                   | 664    | 664    | 900    | 844     | 464     | 795     | 921    |
| ribose-phosphate           | 3813   | 9598   | 5462   | 2632    | 2296    | 2476    | 4127   |
| S-adenosyl-L-methionine    | 730    | 215    | 767    | 415     | 165     | 100     | 100    |
| Sedoheptulose bisphosphate | 845    | 1351   | 782    | 2373    | 870     | 1516    | 419    |
| serine-CBZ                 | 30031  | 18161  | 10329  | 10306   | 15928   | 9601    | 14319  |
| sn-glycerol-3-phosphate    | 1515   | 1515   | 1104   | 605     | 1340    | 1508    | 1242   |
| succinate                  | 51414  | 44230  | 41964  | 38942   | 41735   | 41715   | 44214  |
| threonine-CBZ              | 46775  | 45453  | 106626 | 144648  | 153316  | 150016  | 351916 |
| tryptophan-CBZ             | 3004   | 2832   | 13205  | 13446   | 12379   | 9571    | 9813   |
| tyrosine-CBZ               | 4212   | 4435   | 37192  | 71559   | 61796   | 44966   | 33443  |
| UDP-D-glucose              | 122835 | 125786 | 98727  | 75909   | 100898  | 138552  | 196926 |
| UDP-D-glucuronate          | 63586  | 63586  | 63534  | 61310   | 49990   | 47752   | 71048  |
| UDP-N-acetyl-glucosamine   | 21984  | 24959  | 24880  | 24087   | 27897   | 31009   | 37617  |
| uracil                     | 100    | 100    | 100    | 762     | 484     | 1007    | 1849   |
| UTP-nega                   | 41734  | 33706  | 48229  | 51327   | 45502   | 68625   | 75561  |
| valine-CBZ                 | 60689  | 62611  | 543322 | 1426822 | 1378877 | 1205912 | 162945 |
| xanthosine                 | 1165   | 1165   | 1401   | 940     | 1071    | 972     | 1279   |

**Trimethoprim (4 µg/ml) + 0.3 mM inosine replicate 2 raw data**

| Time (min)                         | 0       | 1       | 5       | 15      | 30      | 60       | 120      |
|------------------------------------|---------|---------|---------|---------|---------|----------|----------|
| Optical density                    | 0.591   | 0.658   | 0.641   | 0.650   | 0.593   | 0.725    | 0.942    |
| 1,3-diphosphateglycerate           | 163     | 170     | 88      | 205     | 319     | 149      | 470      |
| 2,3-dihydroxybenzoate              | 2894    | 1845    | 47684   | 112048  | 153615  | 150619   | 71039    |
| 2,3-Diphosphoglyceric acid         | 2004    | 2247    | 1928    | 2654    | 2637    | 2729     | 2014     |
| 2-Hydroxy-2-methylbutanedioic acid | 94362   | 38507   | 21386   | 11971   | 12508   | 11747    | 17565    |
| 2-Isopropylmalic acid              | 104970  | 80926   | 16577   | 8924    | 9979    | 11683    | 18288    |
| 3-phosphoglycerate                 | 2880    | 2803    | 1208    | 1420    | 1991    | 2107     | 2131     |
| 5-phosphoribosyl 1-pyrophosphate   | 7667    | 5575    | 14589   | 14059   | 16911   | 6994     | 4813     |
| 6-phospho-D-gluconate              | 5189    | 3407    | 605     | 95      | 13      | 83       | 108      |
| acetyl-CoA-nega                    | 10315   | 9570    | 7397    | 8971    | 8796    | 12287    | 15130    |
| acetylphosphate                    | 3580    | 1835    | 1630    | 1845    | 2402    | 2519     | 2826     |
| aconitate                          | 2920    | 1769    | 2290    | 2308    | 1973    | 1717     | 1420     |
| ADP-nega                           | 2268    | 2186    | 1377    | 951     | 711     | 1253     | 2136     |
| a-ketoglutarate                    | 7220    | 6892    | 6786    | 7059    | 8114    | 6873     | 9206     |
| alanine-CBZ                        | 191104  | 158456  | 442108  | 754808  | 689862  | 555735   | 204264   |
| AICAR                              | 100     | 100     | 100     | 272     | 1480    | 2199     | 3694     |
| arginine-CBZ                       | 3169    | 2726    | 14765   | 21673   | 23447   | 21337    | 20408    |
| asparagine-CBZ                     | 28194   | 27934   | 95718   | 100062  | 102304  | 99348    | 90152    |
| aspartate-CBZ                      | 138907  | 132709  | 465775  | 447516  | 490697  | 445528   | 346944   |
| ATP-nega                           | 55465   | 55169   | 52482   | 42419   | 45021   | 60446    | 74763    |
| citrate-isocitrate                 | 63606   | 40529   | 42721   | 27401   | 22820   | 24426    | 17665    |
| citrulline-CBZ                     | 12684   | 12767   | 8052    | 10069   | 11535   | 16881    | 21918    |
| coenzyme A-nega                    | 3797    | 3610    | 4634    | 6644    | 8363    | 7564     | 8189     |
| CTP-nega                           | 15416   | 13636   | 29660   | 22109   | 26711   | 34965    | 39206    |
| dATP-nega                          | 3911    | 4175    | 2978    | 4692    | 7853    | 8615     | 9752     |
| dCTP-nega                          | 3324    | 3325    | 6315    | 3339    | 3779    | 2822     | 3526     |
| D-erythrose-4-phosphate            | 381     | 375     | 224     | 764     | 595     | 363      | 448      |
| D-glucono-δ-lactone-6-phosphate    | 483     | 397     | 667     | 574     | 689     | 341      | 554      |
| D-glyceraldehyde-3-phosphate       | 364     | 270     | 748     | 330     | 384     | 277      | 392      |
| dihydroxy-acetone phosphate        | 3878    | 4254    | 4138    | 4783    | 5208    | 4105     | 4902     |
| D-sedoheptulose-7-phosphate        | 3178    | 2416    | 1805    | 1396    | 1063    | 1279     | 1149     |
| dTTP-nega                          | 7881    | 7042    | 2934    | 697     | 126     | 100      | 100      |
| dUMP-nega                          | 100     | 131     | 5238    | 4449    | 5352    | 6481     | 3448     |
| fructose-1,6-bisphosphate          | 32267   | 29318   | 28499   | 17579   | 9903    | 11744    | 7723     |
| glucose-6-phosphate                | 2393    | 2154    | 1590    | 2153    | 1809    | 1461     | 1200     |
| glutamate-CBZ                      | 6346796 | 5993494 | 8529302 | 9080733 | 9465807 | 10327039 | 10445683 |
| glutamine-CBZ                      | 278753  | 249311  | 549144  | 496872  | 544061  | 570269   | 513749   |
| glutathione disulfide-nega         | 29714   | 29485   | 26434   | 19127   | 17670   | 13593    | 9490     |
| glycine-CBZ                        | 10090   | 6225    | 2748    | 1868    | 1412    | 3207     | 102132   |
| GTP-nega                           | 28766   | 28056   | 19103   | 24599   | 28799   | 30770    | 29133    |
| hexose-phosphate                   | 9248    | 8366    | 6662    | 7333    | 6851    | 6912     | 5089     |
| histidine-CBZ                      | 9832    | 8777    | 15614   | 6336    | 6763    | 7911     | 5226     |
| homocysteine-MMTS                  | 1656    | 1507    | 4480    | 21061   | 25249   | 26160    | 17117    |
| hypoxanthine                       | 24330   | 15949   | 27367   | 31325   | 38058   | 43315    | 46259    |
| inosine                            | 259139  | 361722  | 381532  | 348861  | 323261  | 276336   | 265844   |
| leucine-isoleucine-CBZ             | 33174   | 28717   | 86579   | 154785  | 153405  | 143956   | 977102   |
| lysine-CBZ                         | 116409  | 106235  | 412797  | 953254  | 1118993 | 1336912  | 1877532  |
| malate                             | 44861   | 29325   | 30019   | 22258   | 20773   | 21861    | 25998    |
| methionine-CBZ                     | 16483   | 15302   | 9648    | 1994    | 1658    | 1807     | 508      |
| methylnicotinamide                 | 9711    | 10363   | 8789    | 12030   | 14046   | 11408    | 10597    |
| NAD+_nega                          | 24148   | 24807   | 30412   | 34254   | 42790   | 43239    | 62537    |
| NADP+_nega                         | 8771    | 11976   | 11913   | 12236   | 12472   | 14760    | 15737    |

|                            |        |        |        |         |         |         |        |
|----------------------------|--------|--------|--------|---------|---------|---------|--------|
| NADPH_nega                 | 4013   | 2220   | 2210   | 4091    | 4252    | 2919    | 4705   |
| N-Carbamoyl-L-aspartate    | 27907  | 29509  | 2095   | 2796    | 4700    | 7443    | 5592   |
| ornithine-CBZ              | 15896  | 12162  | 10026  | 12880   | 12201   | 19617   | 23454  |
| pantothenate               | 100    | 100    | 100    | 582     | 1342    | 222     | 100    |
| phenylalanine-CBZ          | 534    | 863    | 3822   | 6111    | 4533    | 2916    | 1646   |
| phenylpyruvate             | 1745   | 775    | 1568   | 3108    | 3253    | 4513    | 5833   |
| phosphoenolpyruvate        | 601    | 691    | 1158   | 1603    | 2270    | 1153    | 2698   |
| prephenate                 | 341    | 253    | 2023   | 2448    | 3841    | 2842    | 2793   |
| proline-CBZ                | 50271  | 41262  | 22406  | 21972   | 30930   | 59640   | 124252 |
| Pyrophosphate              | 3278   | 2190   | 2079   | 2351    | 2482    | 1844    | 1482   |
| pyruvate                   | 793    | 830    | 488    | 583     | 679     | 578     | 614    |
| ribose-phosphate           | 3813   | 8441   | 5120   | 3765    | 2750    | 3272    | 3690   |
| S-adenosyl-L-methionine    | 167    | 100    | 303    | 100     | 100     | 100     | 100    |
| Sedoheptulose bisphosphate | 845    | 1128   | 1327   | 462     | 944     | 592     | 323    |
| serine-CBZ                 | 21542  | 17008  | 11299  | 7452    | 7856    | 11382   | 10480  |
| sn-glycerol-3-phosphate    | 1602   | 1643   | 1641   | 968     | 1488    | 1156    | 2074   |
| succinate                  | 51414  | 40632  | 39745  | 133893  | 39108   | 42258   | 47353  |
| threonine-CBZ              | 42766  | 36897  | 90231  | 122206  | 119199  | 132635  | 313803 |
| tryptophan-CBZ             | 2928   | 2867   | 10896  | 12843   | 11319   | 9228    | 7731   |
| tyrosine-CBZ               | 3394   | 4583   | 26153  | 60227   | 52952   | 30013   | 29099  |
| UDP-D-glucose              | 122835 | 128202 | 108152 | 95787   | 112844  | 159694  | 194670 |
| UDP-D-glucuronate          | 46953  | 50067  | 66845  | 61068   | 58913   | 65217   | 62895  |
| UDP-N-acetyl-glucosamine   | 25278  | 29320  | 27316  | 27189   | 26289   | 33729   | 36159  |
| uracil                     | 100    | 100    | 100    | 350     | 646     | 952     | 1812   |
| UTP-nega                   | 33255  | 27180  | 47798  | 42966   | 46072   | 57604   | 66207  |
| valine-CBZ                 | 65503  | 61337  | 558734 | 1334978 | 1324684 | 1193630 | 152501 |
| xanthosine                 | 1289   | 997    | 993    | 1363    | 879     | 978     | 1318   |

**Trimethoprim (4 µg/ml) + 0.3 mM glycine replicate 1 raw data**

| Time (min)                       | 0        | 1        | 5        | 15       | 30       | 60       | 120      |
|----------------------------------|----------|----------|----------|----------|----------|----------|----------|
| Optical density                  | 0.576    | 0.576    | 0.597    | 0.618    | 0.660    | 0.744    | 0.913    |
| 1,3-diphosphateglycerate         | 740      | 616      | 1070     | 1867     | 6030     | 7602     | 7518     |
| 2,3-dihydroxybenzoate            | 7326     | 3132     | 185247   | 947196   | 1632843  | 1938315  | 2604963  |
| 2,3-Diphosphoglyceric acid       | 6194     | 5307     | 7562     | 11810    | 34864    | 43599    | 44230    |
| 2-Isopropylmalic acid            | 190536   | 135996   | 118486   | 43487    | 46833    | 43630    | 64247    |
| 3-phosphoglycerate               | 19289    | 17386    | 20236    | 14282    | 23090    | 23710    | 33921    |
| 5-phosphoribosyl 1-pyrophosphate | 31848    | 31430    | 100430   | 89344    | 136540   | 147167   | 109727   |
| 6-phospho-D-gluconate            | 20203    | 12934    | 8877     | 3081     | 3689     | 4849     | 5035     |
| acetyl-CoA-nega                  | 42217    | 38569    | 33981    | 21565    | 17742    | 11550    | 17517    |
| acetylphosphate                  | 8.246751 | 10.31229 | 11.32122 | 13.52631 | 13.21736 | 19.49469 | 15.14108 |
| aconitate                        | 20316    | 11632    | 18790    | 31767    | 44652    | 41122    | 39356    |
| ADP-D-glucose                    | 246      | 411      | 121      | 100      | 100      | 100      | 310      |
| ADP-nega                         | 3660     | 4031     | 2864     | 660      | 941      | 1127     | 1421     |
| a-ketoglutarate                  | 15359    | 15733    | 9325     | 6337     | 5579     | 9320     | 8968     |
| alanine-CBZ                      | 200002   | 204525   | 296340   | 782379   | 848145   | 1090970  | 1210504  |
| AICAR                            | 100      | 100      | 942      | 1988     | 1248     | 2398     | 1401     |
| anthranilate                     | 139      | 100      | 207      | 100      | 639      | 956      | 1489     |
| arginine-CBZ                     | 2001     | 4040     | 12833    | 14153    | 9166     | 13523    | 14813    |
| asparagine-CBZ                   | 36732    | 54529    | 120789   | 135339   | 147357   | 196212   | 284603   |
| aspartate-CBZ                    | 207660   | 317827   | 945525   | 1144521  | 1280319  | 1371729  | 1500407  |
| ATP-nega                         | 188531   | 139019   | 83420    | 24812    | 24587    | 28503    | 42361    |
| Cholesteryl sulfate              | 1042     | 650      | 824      | 1179     | 766      | 975      | 980      |
| citrate                          | 45130    | 45938    | 66730    | 70005    | 85395    | 70112    | 69503    |
| citrate/isocitrate               | 445100   | 431607   | 599249   | 622738   | 774720   | 665767   | 613801   |
| citrulline-CBZ                   | 29564    | 33728    | 28756    | 28518    | 25885    | 29137    | 35154    |
| coenzyme A-nega                  | 1918     | 2613     | 5851     | 2743     | 3556     | 2780     | 2360     |
| CTP-nega                         | 54743    | 38926    | 38147    | 18326    | 20604    | 22356    | 21661    |
| dATP-nega                        | 13814    | 14017    | 11916    | 3894     | 6060     | 6088     | 6470     |
| dCTP-nega                        | 11790    | 10427    | 12626    | 5724     | 3849     | 5719     | 3781     |
| dGDP                             | 4928     | 3462     | 3018     | 817      | 1426     | 529      | 1048     |
| D-glucono-δ-lactone-6-phosphate  | 6046     | 6408     | 6174     | 5515     | 5452     | 5295     | 6402     |
| D-glyceraldehyde-3-phosphate     | 834      | 452      | 401      | 1013     | 2371     | 1554     | 2185     |
| dihydroorotate                   | 3288     | 2765     | 396      | 310      | 100      | 180      | 343      |
| dihydroxy-acetone phosphate      | 1049     | 775      | 560      | 1129     | 2645     | 2152     | 1683     |
| D-sedoheptulose-7-phosphate      | 3197     | 2528     | 4650     | 2750     | 3983     | 3718     | 4820     |
| dTTP-nega                        | 27989    | 23694    | 17372    | 3579     | 2821     | 1977     | 2249     |
| dUMP-nega                        | 100      | 197      | 4430     | 1109     | 658      | 1020     | 1948     |
| dUTP-nega                        | 965      | 992      | 1774     | 238      | 421      | 345      | 598      |
| fructose-1,6-bisphosphate        | 53197    | 76623    | 118942   | 253476   | 409316   | 308388   | 286277   |
| fructose-6-phosphate             | 2738     | 1651     | 3012     | 2354     | 3825     | 4317     | 3932     |
| geranyl-PP                       | 29436    | 38201    | 26501    | 27370    | 28559    | 26089    | 27263    |
| glucose-1-phosphate              | 100      | 227      | 243      | 407      | 198      | 175      | 107      |
| glucose-6-phosphate              | 6874     | 5523     | 6641     | 6578     | 6367     | 7415     | 7539     |
| glutamate-CBZ                    | 7739965  | 9649982  | 10675835 | 9560307  | 8661368  | 9088527  | 10263451 |
| glutamine-CBZ                    | 351285   | 449146   | 735581   | 610236   | 543731   | 634277   | 904746   |
| glutathione disulfide-nega       | 42804    | 34294    | 48164    | 40300    | 45107    | 44074    | 32132    |
| glutathione-nega                 | 93767    | 88039    | 86645    | 63058    | 51846    | 47571    | 42914    |
| glycine-CBZ                      | 484367   | 652501   | 576375   | 618922   | 601173   | 591427   | 512660   |
| GTP-nega                         | 115310   | 68306    | 42131    | 43550    | 49726    | 48059    | 47470    |

|                               |          |          |          |         |          |          |          |
|-------------------------------|----------|----------|----------|---------|----------|----------|----------|
| hexose-phosphate              | 18193    | 11830    | 21304    | 17412   | 27572    | 27298    | 26744    |
| histidine-CBZ                 | 278055   | 301763   | 323547   | 299458  | 266920   | 290812   | 320458   |
| homocysteine-MMTS             | 7298     | 6634     | 33445    | 47055   | 37230    | 49929    | 37929    |
| hydroxyphenylpyruvate         | 135      | 100      | 128      | 126     | 949      | 848      | 2049     |
| Indoleacrylic acid            | 3311     | 3128     | 2965     | 2880    | 2644     | 2588     | 3440     |
| isocitrate                    | 108      | 119      | 234      | 674     | 1831     | 2809     | 1699     |
| Kynurenic acid                | 8923     | 7710     | 1928     | 7886    | 4952     | 2773     | 5579     |
| leucine/isoleucine-CBZ        | 52831    | 55927    | 96305    | 179877  | 209157   | 261129   | 647692   |
| lysine-CBZ                    | 157615   | 227523   | 561331   | 899734  | 818111   | 1509360  | 2683272  |
| malate                        | 248039.1 | 207338.8 | 393693.3 | 197715  | 251559.4 | 249176.1 | 267781.6 |
| methionine-CBZ                | 54082    | 59771    | 25590    | 61594   | 77427    | 36739    | 35356    |
| Methylmalonic acid            | 47790    | 33861    | 79351    | 37824   | 39065    | 25564    | 31490    |
| NAD+_nega                     | 37656    | 35844    | 46647    | 54292   | 66621    | 70545    | 91358    |
| NADH_nega                     | 1406     | 1153     | 929      | 1131    | 2335     | 284      | 388      |
| NADP+_nega                    | 32066    | 31586    | 37560    | 21445   | 21520    | 16366    | 25073    |
| NADPH_nega                    | 5852     | 7367     | 7225     | 3625    | 2084     | 3047     | 2391     |
| ornithine-CBZ                 | 16728    | 25513    | 60985    | 52037   | 43373    | 52281    | 88220    |
| orotate                       | 59907    | 22070    | 6367     | 5232    | 4006     | 2985     | 2698     |
| p-aminobenzoate               | 706      | 1111     | 480      | 725     | 383      | 338      | 237      |
| pantothenate                  | 101      | 240      | 677      | 4086    | 4070     | 5971     | 3653     |
| phenylalanine-CBZ             | 702      | 612      | 4109     | 10959   | 13642    | 16980    | 22449    |
| phenylpyruvate                | 1884     | 997      | 2401     | 5857    | 7334     | 9952     | 26195    |
| phosphoenolpyruvate           | 1458     | 2206     | 4982     | 6731    | 10251    | 15779    | 22393    |
| p-hydroxybenzoate             | 1627     | 871      | 1062     | 959     | 2207     | 2780     | 2907     |
| prephenate                    | 1526     | 459      | 4109     | 14802   | 24224    | 24201    | 29197    |
| proline-CBZ                   | 86411    | 80121    | 63173    | 34260   | 36112    | 39993    | 43388    |
| Pyrophosphate                 | 1993     | 1472     | 2079     | 1387    | 1868     | 1493     | 1489     |
| pyruvate                      | 1075     | 571      | 1658     | 992     | 2323     | 6785     | 9774     |
| ribose-phosphate              | 2143     | 2174     | 6508     | 2940    | 3866     | 4914     | 4457     |
| S-adenosyl-L-methionine       | 2820     | 3030     | 346      | 1036    | 2829     | 936      | 1744     |
| serine-CBZ                    | 60112    | 50062    | 23949    | 15146   | 14513    | 16896    | 23679    |
| S-ribosyl-L-homocysteine-nega | 449      | 252      | 148      | 224     | 210      | 105      | 336      |
| succinate C12                 | 1469     | 869      | 2251     | 1474    | 1169     | 685      | 996      |
| threonine-CBZ                 | 80088    | 95732    | 141571   | 150916  | 145482   | 178199   | 221604   |
| trehalose                     | 142      | 165      | 113      | 207     | 100      | 207      | 621      |
| trptophan-CBZ                 | 5155     | 6060     | 15700    | 27430   | 28578    | 20900    | 19249    |
| tyrosine-CBZ                  | 7220     | 7734     | 54859    | 208603  | 289576   | 291881   | 331399   |
| UDP-D-glucose                 | 271784   | 222551   | 152276   | 213255  | 208825   | 205500   | 181498   |
| UDP-D-glucuronate             | 73234    | 82032    | 106229   | 77128   | 54220    | 50431    | 88179    |
| UDP-N-acetyl-glucosamine      | 324      | 100      | 100      | 100     | 100      | 100      | 100      |
| UTP-nega                      | 98251    | 82646    | 93494    | 52717   | 50021    | 63938    | 79062    |
| valine-CBZ                    | 159247   | 159616   | 521232   | 3670325 | 4383810  | 5167267  | 3882147  |



**Trimethoprim (4 µg/ml) + 0.3 mM glycine replicate 2 raw data**

| Time (min)                       | 0        | 1        | 5        | 15       | 30       | 60       | 120      |
|----------------------------------|----------|----------|----------|----------|----------|----------|----------|
| Optical density                  | 0.576    | 0.576    | 0.597    | 0.618    | 0.660    | 0.744    | 0.913    |
| 1,3-diphosphateglycerate         | 1171     | 2057     | 2445     | 2699     | 7205     | 12325    | 10921    |
| 2,3-dihydroxybenzoate            | 10380    | 5139     | 204338   | 1142477  | 1492673  | 2022238  | 2293929  |
| 2,3-Diphosphoglyceric acid       | 11141    | 8785     | 12842    | 16355    | 38070    | 57638    | 58036    |
| 2-Isopropylmalic acid            | 223832   | 148778   | 131395   | 45834    | 41127    | 54400    | 51066    |
| 3-phosphoglycerate               | 18489    | 18161    | 26044    | 18220    | 20227    | 38523    | 30666    |
| 5-phosphoribosyl 1-pyrophosphate | 38038    | 38806    | 170994   | 125838   | 139596   | 171465   | 130904   |
| 6-phospho-D-gluconate            | 20217    | 10986    | 12932    | 3050     | 3969     | 6621     | 4328     |
| acetyl-CoA-nega                  | 29221    | 24760    | 24248    | 23065    | 10651    | 13821    | 12710    |
| acetylphosphate                  | 26.28166 | 8.539456 | 10.51213 | 20.88009 | 57.22926 | 22.54585 | 81.59029 |
| aconitate                        | 27509    | 14910    | 20303    | 31241    | 44029    | 51496    | 43749    |
| ADP-D-glucose                    | 1699     | 628      | 100      | 100      | 100      | 100      | 100      |
| ADP-nega                         | 5668     | 3983     | 3901     | 1490     | 1608     | 1127     | 1044     |
| a-ketoglutarate                  | 13845    | 9624     | 10097    | 8059     | 6098     | 11620    | 8549     |
| alanine-CBZ                      | 242153   | 229908   | 311575   | 916024   | 931666   | 1067020  | 1044870  |
| AICAR                            | 100      | 100      | 853      | 1546     | 4004     | 30       | 1560     |
| anthranilate                     | 110      | 134      | 100      | 100      | 850      | 3341     | 6176     |
| arginine-CBZ                     | 3730     | 4544     | 13065    | 15442    | 10153    | 14708    | 15791    |
| asparagine-CBZ                   | 49033    | 50261    | 105493   | 148566   | 158577   | 184906   | 196254   |
| aspartate-CBZ                    | 226295   | 272984   | 897647   | 1233879  | 1288901  | 1462878  | 1421315  |
| ATP-nega                         | 217310   | 178353   | 105381   | 36128    | 23427    | 41920    | 47495    |
| Cholesteryl sulfate              | 827      | 1879     | 1228     | 1335     | 1618     | 1706     | 2004     |
| citrate                          | 69081    | 62611    | 76703    | 73379    | 91724    | 89331    | 72621    |
| citrate/isocitrate               | 570756   | 597966   | 689482   | 722484   | 855506   | 777780   | 631707   |
| citrulline-CBZ                   | 32369    | 33715    | 37606    | 31888    | 29846    | 33127    | 24281    |
| coenzyme A-nega                  | 2371     | 3854     | 6378     | 6836     | 4266     | 5301     | 3668     |
| CTP-nega                         | 69503    | 47917    | 60068    | 29848    | 25076    | 30513    | 26322    |
| dATP-nega                        | 17307    | 14833    | 11156    | 8865     | 4746     | 10159    | 6538     |
| dCTP-nega                        | 13183    | 12720    | 15168    | 6826     | 4627     | 5323     | 6437     |
| dGDP                             | 4268     | 4078     | 4322     | 1836     | 2079     | 1108     | 1000     |
| D-glucono-δ-lactone-6-phosphate  | 4639     | 4904     | 5306     | 4632     | 5762     | 5155     | 5864     |
| D-glyceraldehyde-3-phosphate     | 194      | 309      | 1101     | 2028     | 3181     | 2859     | 1280     |
| dihydroorotate                   | 2342     | 2858     | 199      | 100      | 100      | 152      | 157      |
| dihydroxy-acetone phosphate      | 316      | 380      | 883      | 1529     | 2972     | 2858     | 1016     |
| D-sedoheptulose-7-phosphate      | 4089     | 2602     | 3239     | 3797     | 4150     | 6344     | 4796     |
| dTTP-nega                        | 44115    | 36178    | 19793    | 6721     | 2281     | 2059     | 2282     |
| dUMP-nega                        | 100      | 272      | 5109     | 2114     | 554      | 1331     | 1988     |
| dUTP-nega                        | 1439     | 1553     | 1035     | 690      | 532      | 768      | 440      |
| fructose-1,6-bisphosphate        | 74851    | 111060   | 149448   | 296177   | 401505   | 337924   | 305545   |
| fructose-6-phosphate             | 2275     | 1863     | 3297     | 3578     | 3700     | 5420     | 2594     |
| geranyl-PP                       | 25073    | 27387    | 26407    | 25847    | 24701    | 26644    | 26382    |
| glucose-1-phosphate              | 222      | 100      | 207      | 247      | 100      | 438      | 100      |
| glucose-6-phosphate              | 4718     | 3714     | 6700     | 6479     | 8071     | 10096    | 7146     |
| glutamate-CBZ                    | 8819144  | 9342889  | 10512835 | 9672436  | 8601268  | 9086716  | 8816768  |
| glutamine-CBZ                    | 446988   | 416157   | 630800   | 692523   | 542736   | 681653   | 677412   |
| glutathione disulfide-nega       | 74313    | 75586    | 80221    | 66668    | 46381    | 64491    | 36143    |
| glutathione-nega                 | 28597    | 27931    | 33803    | 28431    | 19997    | 22126    | 18946    |
| glycine-CBZ                      | 526263   | 700350   | 626237   | 597804   | 624313   | 569536   | 527474   |
| GTP-nega                         | 127707   | 76221    | 65927    | 65516    | 58090    | 67401    | 52750    |

|                               |          |        |          |          |          |          |         |
|-------------------------------|----------|--------|----------|----------|----------|----------|---------|
| hexose-phosphate              | 17073    | 13460  | 22828    | 24318    | 31396    | 35787    | 27765   |
| histidine-CBZ                 | 308942   | 303313 | 276099   | 264457   | 274493   | 257614   | 308407  |
| homocysteine-MMTS             | 7918     | 7361   | 29316    | 49195    | 27490    | 51529    | 32879   |
| hydroxyphenylpyruvate         | 143      | 100    | 100      | 323      | 426      | 1080     | 1129    |
| Indoleacrylic acid            | 3931     | 2881   | 2652     | 3810     | 2509     | 3147     | 4232    |
| isocitrate                    | 100      | 100    | 100      | 674      | 4067     | 2710     | 2403    |
| Kynurenic acid                | 2036     | 3300   | 3346     | 2674     | 5649     | 5050     | 4348    |
| leucine/isoleucine-CBZ        | 64694    | 60988  | 95847    | 203209   | 217330   | 280130   | 637408  |
| lysine-CBZ                    | 209030   | 252090 | 446340   | 1132772  | 844498   | 1920658  | 2415078 |
| malate                        | 171612.8 | 182464 | 436839.1 | 207425.9 | 250850.5 | 275266.2 | 218250  |
| methionine-CBZ                | 57657    | 57722  | 29450    | 63869    | 73913    | 28894    | 30513   |
| Methylmalonic acid            | 66607    | 50153  | 98516    | 49716    | 38632    | 51501    | 31578   |
| NAD+_nega                     | 45506    | 46243  | 56359    | 65252    | 69604    | 96688    | 94809   |
| NADH_nega                     | 249      | 1869   | 3366     | 1460     | 4550     | 1782     | 243     |
| NADP+_nega                    | 43353    | 31758  | 47700    | 47617    | 23240    | 37185    | 32953   |
| NADPH_nega                    | 8507     | 9336   | 8399     | 4629     | 2695     | 3205     | 2824    |
| ornithine-CBZ                 | 26997    | 27067  | 55297    | 49848    | 64373    | 57353    | 59983   |
| orotate                       | 42785    | 24148  | 11080    | 3664     | 3358     | 2113     | 2283    |
| p-aminobenzoate               | 431      | 422    | 221      | 325      | 344      | 750      | 260     |
| pantothenate                  | 100      | 557    | 1202     | 4331     | 3786     | 6191     | 4707    |
| phenylalanine-CBZ             | 647      | 934    | 4595     | 14889    | 15053    | 21235    | 18937   |
| phenylpyruvate                | 1031     | 1017   | 2830     | 8115     | 7946     | 15166    | 17719   |
| phosphoenolpyruvate           | 1982     | 2823   | 4393     | 6084     | 10906    | 21072    | 19341   |
| p-hydroxybenzoate             | 1580     | 826    | 1455     | 1889     | 1827     | 2617     | 3777    |
| prephenate                    | 1214     | 895    | 4337     | 16101    | 24966    | 27832    | 30656   |
| proline-CBZ                   | 82075    | 83100  | 77670    | 39351    | 36071    | 37946    | 42298   |
| Pyrophosphate                 | 2633     | 2423   | 3647     | 2322     | 1680     | 2690     | 1565    |
| pyruvate                      | 1358     | 1405   | 1562     | 1930     | 2419     | 9242     | 11103   |
| ribose-phosphate              | 3038     | 2292   | 6315     | 3728     | 3851     | 6541     | 4879    |
| S-adenosyl-L-methionine       | 3691     | 2817   | 1463     | 2287     | 2610     | 1147     | 2118    |
| serine-CBZ                    | 56467    | 52378  | 22902    | 16132    | 19636    | 15667    | 22067   |
| S-ribosyl-L-homocysteine-nega | 354      | 372    | 225      | 486      | 100      | 122      | 100     |
| succinate C12                 | 2563     | 1425   | 4166     | 1293     | 887      | 1523     | 789     |
| threonine-CBZ                 | 108863   | 89514  | 138144   | 181296   | 152165   | 213384   | 210368  |
| trehalose                     | 129      | 100    | 137      | 243      | 254      | 114      | 322     |
| trptophan-CBZ                 | 4785     | 5272   | 17130    | 32190    | 29427    | 26401    | 17770   |
| tyrosine-CBZ                  | 6566     | 8292   | 59874    | 257224   | 293375   | 391981   | 319490  |
| UDP-D-glucose                 | 125168   | 151038 | 175787   | 164805   | 219312   | 249689   | 193692  |
| UDP-D-glucuronate             | 82267    | 87539  | 120138   | 74631    | 66705    | 100766   | 61279   |
| UDP-N-acetyl-glucosamine      | 100      | 100    | 100      | 100      | 100      | 100      | 100     |
| UTP-nega                      | 128055   | 106056 | 121984   | 71644    | 49188    | 84997    | 89987   |
| valine-CBZ                    | 182577   | 174860 | 519589   | 4193021  | 4476842  | 4756978  | 4420642 |

**Trimethoprim (4 µg/ml) + 0.3 mM glycine replicate 3 raw data**

| Time (min)                         | 0       | 1       | 5       | 15      | 30      | 60      | 120     |
|------------------------------------|---------|---------|---------|---------|---------|---------|---------|
| Optical density                    | 0.520   | 0.524   | 0.483   | 0.402   | 0.420   | 0.462   | 0.510   |
| 1,3-diphosphateglycerate           | 214     | 519     | 801     | 1791    | 3479    | 3616    | 5732    |
| 2,3-dihydroxybenzoate              | 2835    | 1713    | 47942   | 153544  | 175289  | 141147  | 246245  |
| 2,3-Diphosphoglyceric acid         | 4099    | 4117    | 5020    | 10242   | 16450   | 14648   | 18005   |
| 2-Hydroxy-2-methylbutanedioic acid | 22987   | 7397    | 1945    | 2170    | 373     | 1329    | 1074    |
| 2-Isopropylmalic acid              | 42888   | 27634   | 11940   | 12264   | 10991   | 4896    | 10152   |
| 3-phosphoglycerate                 | 13578   | 15356   | 11982   | 9868    | 15095   | 8710    | 15141   |
| 5-phosphoribosyl 1-pyrophosphate   | 22646   | 41154   | 87374   | 68522   | 93601   | 81660   | 84881   |
| 6-phospho-D-gluconate              | 19397   | 12278   | 8667    | 2189    | 3156    | 1015    | 2760    |
| acetyl-CoA-nega                    | 39181   | 41070   | 30062   | 24199   | 14483   | 9434    | 18400   |
| acetylphosphate                    | 14789   | 13023   | 15146   | 19142   | 24583   | 14781   | 33763   |
| aconitate                          | 7566    | 4000    | 4695    | 16528   | 21342   | 14637   | 12531   |
| adenosine 5'-phosphosulfate        | 1730    | 1362    | 922     | 753     | 453     | 230     | 458     |
| ADP-nega                           | 3442    | 2890    | 1223    | 893     | 728     | 670     | 2074    |
| a-ketoglutarate                    | 14243   | 10313   | 8207    | 6882    | 6730    | 18843   | 5714    |
| alanine-CBZ                        | 338504  | 336423  | 753613  | 1640487 | 1610082 | 1466894 | 1807573 |
| anthranilate                       | 130     | 100     | 189     | 176     | 270     | 260     | 1138    |
| arginine-CBZ                       | 13782   | 17102   | 33677   | 26279   | 30180   | 22580   | 56744   |
| asparagine-CBZ                     | 39142   | 47241   | 81245   | 114484  | 118909  | 91905   | 135964  |
| aspartate-CBZ                      | 182722  | 303014  | 812867  | 915810  | 1001989 | 697868  | 878591  |
| ATP-nega                           | 66235   | 57587   | 15480   | 7962    | 8785    | 6399    | 15102   |
| citrate                            | 9961    | 5842    | 4550    | 39433   | 49047   | 12493   | 12200   |
| citrate-isocitrate                 | 62760   | 36130   | 34766   | 211905  | 235368  | 60301   | 68693   |
| citrulline-CBZ                     | 39879   | 42754   | 30923   | 44633   | 34490   | 14150   | 25354   |
| coenzyme A-nega                    | 7978    | 12466   | 14521   | 14435   | 10876   | 6933    | 9479    |
| CTP-nega                           | 20582   | 18362   | 12132   | 4863    | 7984    | 7161    | 13369   |
| dATP-nega                          | 6185    | 7483    | 1030    | 876     | 1644    | 676     | 3904    |
| dCTP-nega                          | 5290    | 5372    | 4965    | 2467    | 2477    | 1264    | 2834    |
| D-erythrose-4-phosphate            | 535     | 742     | 624     | 563     | 544     | 705     | 399     |
| D-glyceraldehyde-3-phosphate       | 1016    | 1029    | 2059    | 2676    | 2140    | 1917    | 2265    |
| dihydroxy-acetone phosphate        | 13097   | 15202   | 18821   | 48508   | 44022   | 28108   | 30222   |
| D-sedoheptulose-7-phosphate        | 3163    | 1952    | 3122    | 3001    | 3746    | 1823    | 1857    |
| dTTP-nega                          | 12097   | 11317   | 3236    | 1452    | 594     | 559     | 100     |
| dUMP-nega                          | 100     | 868     | 3325    | 347     | 449     | 363     | 1560    |
| fructose-1,6-bisphosphate          | 82819   | 122180  | 178163  | 613566  | 573140  | 365223  | 278158  |
| fructose-6-phosphate               | 7105    | 4024    | 6320    | 6585    | 8441    | 3608    | 5012    |
| glucono-δ-lactone                  | 206     | 906     | 828     | 933     | 1381    | 1182    | 1104    |
| glutamate-CBZ                      | 8540789 | 9519781 | 8208207 | 8775737 | 8402980 | 6338901 | 9823269 |
| glutamine-CBZ                      | 467855  | 554496  | 619654  | 606862  | 585542  | 404698  | 719236  |
| glutathione disulfide-nega         | 26712   | 40623   | 31077   | 29315   | 26593   | 17584   | 14723   |
| glutathione-nega                   | 96056   | 90196   | 70573   | 73805   | 49819   | 38839   | 46864   |
| glycine-CBZ                        | 812195  | 831301  | 873071  | 872543  | 838984  | 921831  | 767083  |
| GTP-nega                           | 40035   | 31720   | 18834   | 24833   | 27725   | 19830   | 22978   |
| hexose-phosphate                   | 15575   | 13358   | 20837   | 21460   | 23717   | 14750   | 15300   |
| histidine-CBZ                      | 17435   | 14046   | 5407    | 100     | 100     | 5159    | 7147    |
| homocysteine-MMTS                  | 1756    | 1140    | 4723    | 2819    | 3130    | 2673    | 8518    |
| isocitrate                         | 508     | 100     | 650     | 3916    | 5651    | 1857    | 1426    |
| leucine-isoleucine-CBZ             | 112740  | 145272  | 178780  | 411074  | 394106  | 349466  | 1532417 |
| lysine-CBZ                         | 303054  | 388454  | 532433  | 743257  | 1020573 | 901886  | 4060650 |

|                            |        |        |         |         |         |         |         |
|----------------------------|--------|--------|---------|---------|---------|---------|---------|
| malate                     | 76889  | 73642  | 96838   | 32541   | 47196   | 20746   | 27957   |
| Maleic acid                | 4716   | 4257   | 3505    | 3058    | 3100    | 4373    | 3136    |
| methionine-CBZ             | 39201  | 35244  | 29978   | 76609   | 54056   | 31023   | 8514    |
| NAD+_nega                  | 51677  | 55986  | 52457   | 67938   | 68224   | 46381   | 70811   |
| NAD+_posi                  | 483    | 649    | 724     | 1213    | 926     | 565     | 1752    |
| NADP+_nega                 | 41439  | 38159  | 33193   | 41496   | 32685   | 23291   | 34869   |
| NADPH_nega                 | 11252  | 9753   | 10633   | 6959    | 5405    | 4077    | 7557    |
| N-Carbamoyl-L-aspartate    | 53341  | 22526  | 772     | 520     | 230     | 3456    | 233     |
| Octulose bisposphate       | 1407   | 945    | 908     | 1810    | 1147    | 740     | 931     |
| ornithine-CBZ              | 42131  | 55240  | 111015  | 93895   | 55077   | 22503   | 30327   |
| pantothenate               | 100    | 100    | 347     | 2828    | 3709    | 1363    | 903     |
| phenylalanine-CBZ          | 3101   | 5061   | 12678   | 28078   | 28164   | 23560   | 32791   |
| phenylpyruvate             | 2202   | 1132   | 1266    | 5368    | 9332    | 8408    | 17173   |
| phosphoenolpyruvate        | 6017   | 7827   | 14474   | 11364   | 19425   | 11974   | 24910   |
| prephenate                 | 1547   | 518    | 1884    | 7615    | 8032    | 5800    | 9455    |
| proline-CBZ                | 130402 | 108624 | 63434   | 47821   | 46781   | 26596   | 66878   |
| Pyrophosphate              | 17394  | 9141   | 16437   | 14424   | 11726   | 15983   | 14229   |
| pyruvate                   | 744    | 1016   | 3556    | 1842    | 3509    | 3355    | 12185   |
| ribose-phosphate           | 4089   | 3316   | 7402    | 5343    | 4800    | 2757    | 4527    |
| S-adenosyl-L-methionine    | 3604   | 1951   | 1254    | 1054    | 3390    | 4061    | 2228    |
| Sedoheptulose bisphosphate | 1553   | 2232   | 11134   | 42465   | 52360   | 32564   | 21209   |
| serine-CBZ                 | 57617  | 35926  | 14291   | 8929    | 6718    | 7448    | 11811   |
| shikimate-3-phosphate      | 269    | 829    | 863     | 417     | 463     | 328     | 395     |
| sn-glycerol-3-phosphate    | 3840   | 3379   | 2671    | 3593    | 3602    | 6045    | 2371    |
| succinate                  | 55080  | 36476  | 45545   | 31572   | 30075   | 41526   | 23601   |
| threonine-CBZ              | 87831  | 92302  | 100346  | 128606  | 131025  | 95597   | 184718  |
| trehalose                  | 159    | 100    | 460     | 196     | 416     | 512     | 890     |
| trehalose 6-Phosphate      | 100    | 100    | 100     | 111     | 679     | 488     | 567     |
| tryptophan-CBZ             | 9969   | 8445   | 18137   | 47471   | 29406   | 12687   | 16493   |
| tyrosine-CBZ               | 14228  | 21837  | 61480   | 251057  | 246892  | 102097  | 261041  |
| UDP-D-glucose              | 318567 | 351497 | 361004  | 384796  | 374607  | 286722  | 312026  |
| UDP-D-glucuronate          | 92886  | 97521  | 86883   | 75198   | 71659   | 41446   | 61265   |
| UDP-N-acetyl-glucosamine   | 59194  | 75677  | 26179   | 30579   | 37168   | 21243   | 33643   |
| UDP-nega                   | 2549   | 1395   | 1036    | 814     | 1206    | 290     | 845     |
| uracil                     | 100    | 100    | 100     | 278     | 108     | 553     | 194     |
| UTP-nega                   | 45761  | 45458  | 32765   | 26955   | 29515   | 27798   | 44807   |
| valine-CBZ                 | 224944 | 262987 | 1550313 | 6313571 | 6829962 | 6373527 | 6662768 |

**Trimethoprim (4 µg/ml) + 0.3 mM glycine replicate 4 raw data**

| Time (min)                         | 0       | 1       | 5       | 15      | 30      | 60      | 120     |
|------------------------------------|---------|---------|---------|---------|---------|---------|---------|
| Optical density                    | 0.520   | 0.524   | 0.483   | 0.402   | 0.420   | 0.462   | 0.510   |
| 1,3-diphosphateglycerate           | 512     | 348     | 1020    | 2041    | 4026    | 6845    | 3691    |
| 2,3-dihydroxybenzoate              | 3917    | 2001    | 56796   | 118771  | 149492  | 188963  | 236903  |
| 2,3-Diphosphoglyceric acid         | 3263    | 2628    | 4615    | 7278    | 13095   | 19169   | 14041   |
| 2-Hydroxy-2-methylbutanedioic acid | 21573   | 3601    | 2905    | 2537    | 1482    | 608     | 1038    |
| 2-Isopropylmalic acid              | 37657   | 14900   | 11077   | 10555   | 9771    | 9022    | 8979    |
| 3-phosphoglycerate                 | 10903   | 8266    | 13041   | 7755    | 12109   | 11673   | 15765   |
| 5-phosphoribosyl 1-pyrophosphate   | 22761   | 47106   | 107049  | 99111   | 144980  | 162539  | 115862  |
| 6-phospho-D-gluconate              | 16598   | 9431    | 8592    | 1791    | 3445    | 3047    | 3186    |
| acetyl-CoA-nega                    | 22656   | 18033   | 21772   | 13558   | 10096   | 11176   | 11972   |
| acetylphosphate                    | 13783   | 7628    | 12866   | 15271   | 17574   | 24556   | 24547   |
| aconitate                          | 5443    | 3482    | 6752    | 14780   | 19709   | 20576   | 16307   |
| adenosine 5'-phosphosulfate        | 689     | 900     | 1008    | 1251    | 139     | 101     | 814     |
| ADP-nega                           | 3098    | 2435    | 1769    | 1527    | 2277    | 1735    | 1053    |
| a-ketoglutarate                    | 11641   | 7153    | 7383    | 6111    | 7730    | 5240    | 13629   |
| alanine-CBZ                        | 392916  | 297202  | 834126  | 1602766 | 1535583 | 1697447 | 1600091 |
| anthranilate                       | 100     | 100     | 100     | 100     | 272     | 1158    | 2063    |
| arginine-CBZ                       | 10360   | 13039   | 29680   | 26999   | 22954   | 27997   | 39859   |
| asparagine-CBZ                     | 38104   | 40684   | 84374   | 103597  | 107557  | 114733  | 118032  |
| aspartate-CBZ                      | 191521  | 294531  | 758096  | 807273  | 862445  | 932453  | 782779  |
| ATP-nega                           | 59773   | 45826   | 14031   | 9472    | 10167   | 11418   | 17927   |
| citrate                            | 10673   | 3426    | 7087    | 23435   | 39224   | 26662   | 10261   |
| citrate-isocitrate                 | 46739   | 14467   | 31965   | 143939  | 184989  | 120182  | 48007   |
| citrulline-CBZ                     | 41675   | 35270   | 34579   | 35463   | 28674   | 24455   | 20527   |
| coenzyme A-nega                    | 8365    | 7578    | 10083   | 11334   | 10010   | 8509    | 7006    |
| CTP-nega                           | 21232   | 18851   | 12902   | 6051    | 7967    | 11364   | 7375    |
| dATP-nega                          | 5801    | 4854    | 2496    | 2076    | 871     | 1309    | 1661    |
| dCTP-nega                          | 6614    | 5914    | 6563    | 1419    | 2703    | 2452    | 2595    |
| D-erythrose-4-phosphate            | 555     | 1080    | 785     | 1082    | 360     | 379     | 560     |
| D-glyceraldehyde-3-phosphate       | 589     | 1323    | 816     | 3032    | 2541    | 2769    | 1117    |
| dihydroxy-acetone phosphate        | 10908   | 9902    | 18291   | 38836   | 41583   | 37441   | 25652   |
| D-sedoheptulose-7-phosphate        | 1859    | 1130    | 3218    | 1828    | 2660    | 1978    | 2678    |
| dTTP-nega                          | 13026   | 9925    | 3548    | 844     | 488     | 123     | 100     |
| dUMP-nega                          | 100     | 226     | 2474    | 558     | 379     | 569     | 1255    |
| fructose-1,6-bisphosphate          | 81833   | 88114   | 198891  | 519906  | 502022  | 440293  | 234872  |
| fructose-6-phosphate               | 4141    | 2472    | 6471    | 5722    | 5193    | 4970    | 5172    |
| glucono- δ -lactone                | 558     | 508     | 426     | 527     | 610     | 1328    | 701     |
| glutamate-CBZ                      | 9496354 | 9045904 | 8897737 | 8589127 | 8091353 | 8477715 | 9310297 |
| glutamine-CBZ                      | 562711  | 435919  | 656689  | 531635  | 462186  | 596109  | 606663  |
| glutathione disulfide-nega         | 43807   | 56015   | 46638   | 34204   | 32069   | 42171   | 34301   |
| glutathione-nega                   | 80368   | 44966   | 67405   | 53318   | 37339   | 49883   | 25843   |
| glycine-CBZ                        | 714584  | 855745  | 794769  | 801450  | 821547  | 801210  | 727331  |
| GTP-nega                           | 47023   | 30931   | 18004   | 21842   | 30773   | 26082   | 15071   |
| hexose-phosphate                   | 11110   | 7898    | 21225   | 14246   | 20261   | 15907   | 16031   |
| histidine-CBZ                      | 15653   | 10331   | 6173    | 3644    | 4637    | 8058    | 11408   |
| homocysteine-MMTS                  | 1531    | 1497    | 4536    | 3945    | 1366    | 3564    | 7326    |
| isocitrate                         | 213     | 125     | 559     | 2332    | 3475    | 3367    | 1019    |
| leucine-isoleucine-CBZ             | 136989  | 110923  | 230306  | 380262  | 359758  | 526754  | 1488167 |
| lysine-CBZ                         | 211506  | 206289  | 312063  | 501166  | 577738  | 1060647 | 2430718 |

|                            |        |        |         |         |         |         |         |
|----------------------------|--------|--------|---------|---------|---------|---------|---------|
| malate                     | 68805  | 44382  | 89372   | 33474   | 33017   | 24339   | 21890   |
| Maleic acid                | 3875   | 2882   | 2848    | 3083    | 2894    | 2682    | 3346    |
| methionine-CBZ             | 40775  | 30978  | 31076   | 67359   | 51845   | 29945   | 12322   |
| NAD+_nega                  | 41915  | 37008  | 49182   | 48339   | 51962   | 61200   | 62204   |
| NAD+_posi                  | 678    | 922    | 1999    | 459     | 1377    | 1230    | 1664    |
| NADP+_nega                 | 36918  | 28174  | 30222   | 23047   | 19942   | 18162   | 16701   |
| NADPH_nega                 | 6528   | 5437   | 8609    | 6493    | 3125    | 4634    | 4618    |
| N-Carbamoyl-L-aspartate    | 44597  | 14754  | 383     | 261     | 334     | 473     | 1480    |
| Octulose bisposphate       | 1009   | 432    | 564     | 881     | 1630    | 912     | 567     |
| ornithine-CBZ              | 28027  | 32028  | 84176   | 57158   | 32702   | 31949   | 15603   |
| pantothenate               | 100    | 213    | 339     | 3739    | 1944    | 3257    | 1583    |
| phenylalanine-CBZ          | 3928   | 4757   | 14866   | 28008   | 25310   | 37141   | 32534   |
| phenylpyruvate             | 4365   | 829    | 1975    | 3468    | 6534    | 8499    | 18153   |
| phosphoenolpyruvate        | 5197   | 5104   | 13406   | 11062   | 17134   | 17716   | 21879   |
| prephenate                 | 1207   | 342    | 3204    | 4483    | 6564    | 7548    | 6633    |
| proline-CBZ                | 113803 | 83751  | 62686   | 38613   | 36685   | 40051   | 51246   |
| Pyrophosphate              | 11289  | 11847  | 11022   | 15101   | 20747   | 22711   | 12099   |
| pyruvate                   | 965    | 458    | 2317    | 1020    | 2459    | 4356    | 7434    |
| ribose-phosphate           | 2594   | 2872   | 8086    | 3294    | 3400    | 3162    | 3718    |
| S-adenosyl-L-methionine    | 2668   | 1487   | 452     | 1680    | 2099    |         | 2689    |
| Sedoheptulose bisphosphate | 1038   | 1485   | 11535   | 35029   | 42927   | 37522   | 18276   |
| serine-CBZ                 | 59919  | 23789  | 11386   | 7219    | 6938    | 8041    | 10612   |
| shikimate-3-phosphate      | 1871   | 598    | 1440    | 959     | 1123    | 1447    | 1050    |
| sn-glycerol-3-phosphate    | 2872   | 1769   | 1494    | 3544    | 3134    | 2963    | 2980    |
| succinate                  | 40609  | 27984  | 41475   | 29764   | 31479   | 21609   | 33646   |
| threonine-CBZ              | 81374  | 68788  | 94434   | 106712  | 105258  | 128202  | 144583  |
| trehalose                  | 143    | 523    | 188     | 141     | 182     | 536     | 645     |
| trehalose 6-Phosphate      | 100    | 100    | 100     | 100     | 250     | 883     | 318     |
| tryptophan-CBZ             | 8259   | 9758   | 21635   | 46403   | 25754   | 17751   | 14099   |
| tyrosine-CBZ               | 12858  | 21215  | 81415   | 244594  | 243122  | 323769  | 198802  |
| UDP-D-glucose              | 251183 | 232299 | 307767  | 275594  | 281365  | 340621  | 246640  |
| UDP-D-glucuronate          | 67566  | 63986  | 73525   | 57191   | 48539   | 48895   | 41748   |
| UDP-N-acetyl-glucosamine   | 56140  | 44706  | 32315   | 26331   | 29427   | 26782   | 26571   |
| UDP-nega                   | 1145   | 321    | 551     | 415     | 903     | 957     | 580     |
| uracil                     | 100    | 100    | 100     | 110     | 128     | 124     | 1005    |
| UTP-nega                   | 47179  | 42012  | 43109   | 32896   | 32046   | 43519   | 44682   |
| valine-CBZ                 | 289643 | 253836 | 1772405 | 6365267 | 6593737 | 7683821 | 6454803 |

**Trimethoprim (4 µg/ml) + 0.3 mM gly + met replicate 1 raw data**

| Time (min)                         | 0       | 1       | 5       | 15      | 30      | 60      | 120     |
|------------------------------------|---------|---------|---------|---------|---------|---------|---------|
| Optical density                    | 0.632   | 0.632   | 0.649   | 0.667   | 0.701   | 0.771   | 0.910   |
| 1,3-diphosphateglycerate           | 305     | 267     | 280     | 815     | 2131    | 4088    | 3486    |
| 2,3-dihydroxybenzoate              | 635     | 390     | 51860   | 153860  | 230365  | 341412  | 425540  |
| 2,3-Diphosphoglyceric acid         | 3439    | 3334    | 2851    | 5806    | 11512   | 17480   | 21812   |
| 2-Hydroxy-2-methylbutanedioic acid | 41179   | 17656   | 8461    | 8467    | 5016    | 4433    | 2762    |
| 2-Isopropylmalic acid              | 148557  | 107259  | 59799   | 22771   | 25134   | 20631   | 23300   |
| 2-oxo-4-methylthiobutanoate        | 3791    | 1728    | 2204    | 291     | 228     | 313     | 247     |
| 3-phosphoglycerate                 | 26396   | 23432   | 29781   | 25568   | 35680   | 32193   | 35854   |
| 5-phosphoribosyl 1-pyrophosphate   | 8794    | 15661   | 28398   | 25191   | 35040   | 32745   | 26089   |
| 6-phospho-D-gluconate              | 11969   | 8503    | 8159    | 2927    | 6378    | 3161    | 3409    |
| acetyl-CoA-nega                    | 7685    | 7342    | 6333    | 5333    | 3572    | 4190    | 2215    |
| acetylphosphate                    | 10857   | 6556    | 7411    | 9732    | 15186   | 18475   | 23607   |
| aconitate                          | 9513    | 7155    | 7164    | 16050   | 20682   | 16458   | 17799   |
| ADP-nega                           | 2447    | 3532    | 2183    | 917     | 937     | 452     | 158     |
| a-ketoglutarate                    | 16264   | 8111    | 5065    | 4160    | 5807    | 5192    | 6840    |
| alanine-CBZ                        | 230875  | 228083  | 433962  | 996202  | 1101690 | 1260683 | 1415615 |
| alanine-CBZ-C13N15-IS              | 532133  | 508863  | 420811  | 300160  | 290766  | 263901  | 238465  |
| AICAR                              | 100     | 100     | 2938    | 4568    | 4699    | 4738    | 3553    |
| anthranilate                       | 113     | 100     | 322     | 100     | 2257    | 2781    | 12194   |
| arginine-CBZ                       | 6740    | 7477    | 13028   | 13267   | 11674   | 10021   | 8765    |
| Ascorbic acid                      | 176     | 100     | 5700    | 2396    | 10792   | 17064   | 29019   |
| asparagine-CBZ                     | 114064  | 99466   | 185514  | 206536  | 192001  | 227795  | 214485  |
| aspartate-CBZ                      | 303491  | 360786  | 905972  | 1062566 | 1101089 | 1201181 | 1043197 |
| ATP-nega                           | 70960   | 57427   | 21604   | 7626    | 8255    | 8116    | 5658    |
| citrate                            | 17464   | 18245   | 16651   | 21503   | 24483   | 15659   | 16515   |
| citrate/isocitrate                 | 141258  | 150260  | 135493  | 199784  | 212828  | 130537  | 118537  |
| citrulline-CBZ                     | 23337   | 21478   | 31683   | 28966   | 17241   | 20968   | 18824   |
| coenzyme A-nega                    | 746     | 986     | 1193    | 602     | 1010    | 968     | 258     |
| CTP/UTP-nega-IS                    | 19522   | 19576   | 22776   | 23119   | 20669   | 23022   | 24996   |
| CTP-nega                           | 18706   | 17618   | 11700   | 4369    | 4386    | 3902    | 4145    |
| dATP-nega                          | 4711    | 4665    | 2451    | 2345    | 833     | 876     | 546     |
| dCTP-nega                          | 3918    | 5038    | 3003    | 1256    | 1521    | 1956    | 1202    |
| dGDP                               | 3268    | 3933    | 1875    | 340     | 579     | 507     | 639     |
| D-glucono-δ-lactone-6-phosphate    | 2526    | 2579    | 2231    | 2218    | 2580    | 2127    | 2202    |
| D-glyceraldehyde-3-phosphate       | 374     | 1108    | 1791    | 3400    | 4249    | 4342    | 3826    |
| dihydroorotate                     | 5238    | 5311    | 589     | 216     | 100     | 138     | 100     |
| dihydroxy-acetone phosphate        | 13342   | 12788   | 21467   | 52473   | 54801   | 51907   | 54605   |
| D-sedoheptulose-7-phosphate        | 6177    | 4247    | 7914    | 5945    | 7170    | 6463    | 7364    |
| dTTP-nega                          | 10196   | 10797   | 3381    | 2369    | 694     | 291     | 127     |
| dUMP-nega                          | 100     | 891     | 11927   | 2647    | 1923    | 807     | 1792    |
| fructose-1,6-bisphosphate          | 10673   | 12803   | 21750   | 68521   | 74847   | 73278   | 81739   |
| fructose-6-phosphate               | 1276    | 1091    | 3111    | 2691    | 3960    | 2889    | 2998    |
| fumarate C12                       | 1601    | 1085    | 2259    | 1398    | 1479    | 368     | 908     |
| geranyl-PP                         | 12869   | 11881   | 12067   | 12444   | 12544   | 11712   | 12313   |
| glucose-1-phosphate                | 1578    | 1665    | 3586    | 2787    | 4806    | 2661    | 3803    |
| glucose-6-phosphate                | 3919    | 3123    | 6415    | 6168    | 5355    | 5161    | 5505    |
| glutamate-CBZ                      | 7807651 | 7526140 | 8368858 | 8550093 | 7344356 | 7702869 | 6814338 |
| glutamate-CBZ-C13N15-IS            | 193130  | 144076  | 132989  | 119921  | 112153  | 125613  | 123482  |
| glutamine-CBZ                      | 532753  | 462694  | 716399  | 620425  | 530363  | 544200  | 485983  |
| glutathione disulfide-nega         | 28344   | 29838   | 30464   | 28137   | 25776   | 30130   | 51319   |
| glutathione-nega                   | 216407  | 218401  | 210924  | 186757  | 141570  | 112744  | 11447   |
| glycine-CBZ                        | 455566  | 554959  | 432275  | 449131  | 452078  | 392027  | 377830  |

|                               |         |         |         |         |         |         |         |
|-------------------------------|---------|---------|---------|---------|---------|---------|---------|
| GTP-nega                      | 1388    | 1656    | 100     | 447     | 249     | 268     | 135     |
| hexose-phosphate              | 10643   | 9241    | 18521   | 20406   | 26624   | 22138   | 23427   |
| histidine-CBZ                 | 15357   | 12095   | 8391    | 3958    | 3588    | 3933    | 5598    |
| homocysteine-MMTS             | 43442   | 41691   | 33258   | 36086   | 18365   | 22329   | 12016   |
| Indoleacrylic acid            | 1646    | 1409    | 2010    | 1645    | 1116    | 1734    | 1980    |
| leucine/isoleucine-CBZ        | 52519   | 48493   | 81019   | 144201  | 152455  | 156827  | 164044  |
| lysine-CBZ                    | 188418  | 175172  | 404235  | 713092  | 521881  | 796806  | 897858  |
| malate                        | 60668   | 38404   | 57467   | 25877   | 33033   | 24224   | 22346   |
| methionine-CBZ                | 5726679 | 5566031 | 5925366 | 5448499 | 5187795 | 5387981 | 5268748 |
| Methylmalonic acid            | 46941   | 28848   | 43044   | 29255   | 24909   | 16040   | 16576   |
| N-Acetyl-L-alanine            | 100     | 100     | 100     | 170     | 174     | 608     | 1251    |
| NAD+_nega                     | 27512   | 27520   | 29446   | 40016   | 42093   | 44125   | 48893   |
| NADP+_nega                    | 12507   | 12835   | 10942   | 14452   | 8140    | 8543    | 5396    |
| NADPH_nega                    | 2511    | 3086    | 2543    | 1610    | 1185    | 208     | 889     |
| N-Carbamoyl-L-aspartate       | 30661   | 24753   | 714     | 221     | 100     | 137     | 100     |
| ornithine-CBZ                 | 17539   | 12778   | 48031   | 50402   | 24408   | 36109   | 29123   |
| orotate                       | 26498   | 13696   | 4146    | 1947    | 1669    | 1352    | 667     |
| pantothenate                  | 100     | 100     | 100     | 1778    | 4007    | 3446    | 3539    |
| phenylalanine-CBZ             | 496     | 594     | 7820    | 16184   | 18545   | 23061   | 26025   |
| phenylpyruvate                | 2815    | 577     | 6505    | 11656   | 15233   | 13378   | 14924   |
| phosphoenolpyruvate           | 2132    | 2206    | 4057    | 6432    | 15025   | 12945   | 14322   |
| p-hydroxybenzoate             | 1498    | 697     | 783     | 1116    | 1342    | 1312    | 2345    |
| prephenate                    | 1323    | 302     | 5643    | 14097   | 16577   | 18596   | 24909   |
| proline-CBZ                   | 77333   | 74998   | 43783   | 22579   | 23875   | 19651   | 18609   |
| pyruvate                      | 1038    | 607     | 5192    | 2845    | 4589    | 6217    | 7259    |
| quinolinate                   | 15346   | 12761   | 12857   | 11899   | 13443   | 10108   | 14038   |
| ribose-phosphate              | 10839   | 10221   | 19918   | 14981   | 18786   | 15025   | 16341   |
| S-adenosyl-L-methionine MMTS  | 6728    | 4231    | 3749    | 3326    | 4006    | 3975    | 7682    |
| S-adenosyl-L-methionine pos   | 10607   | 5076    | 6353    | 6018    | 4358    | 5071    | 6840    |
| serine-CBZ                    | 65574   | 44237   | 15529   | 9278    | 8464    | 8833    | 7434    |
| shikimate-3-phosphate         | 420     | 690     | 586     | 542     | 1795    | 870     | 1653    |
| sn-glycerol-3-phosphate       | 4550    | 3446    | 2914    | 4850    | 6237    | 4177    | 4519    |
| S-ribosyl-L-homocysteine-nega | 493     | 714     | 650     | 1079    | 124     | 136     | 100     |
| succinate C12                 | 1179    | 841     | 1407    | 759     | 447     | 356     | 345     |
| threonine-CBZ                 | 78930   | 62756   | 85584   | 78692   | 72054   | 68447   | 66269   |
| threonine-CBZ-C13             | 8237    | 6520    | 6208    | 4104    | 4758    | 3856    | 3481    |
| trehalose                     | 104     | 102     | 100     | 100     | 371     | 297     | 1097    |
| trehalose 6-Phosphate         | 100     | 100     | 100     | 182     | 338     | 1007    | 1558    |
| trptophan-CBZ                 | 5061    | 5211    | 21724   | 31028   | 21503   | 25905   | 19613   |
| tyrosine-CBZ                  | 5920    | 7083    | 87994   | 277940  | 387497  | 369229  | 383346  |
| UDP-D-glucose                 | 324476  | 304636  | 336855  | 361762  | 400098  | 450568  | 475036  |
| UDP-D-glucuronate             | 104518  | 95112   | 85928   | 68925   | 59770   | 50794   | 56687   |
| UDP-N-acetyl-glucosamine      | 75178   | 75355   | 41099   | 33841   | 35867   | 32362   | 30150   |
| UDP-nega                      | 1093    | 1721    | 1333    | 695     | 808     | 451     | 549     |
| UTP-nega                      | 30970   | 30150   | 25955   | 17761   | 15360   | 16716   | 17756   |
| valine-CBZ                    | 85482   | 63085   | 344942  | 2242961 | 2144860 | 2332312 | 2382079 |



**Trimethoprim (4 µg/ml) + 0.3 mM gly + met replicate 2 raw data**

| Time (min)                         | 0       | 1       | 5       | 15      | 30      | 60      | 120     |
|------------------------------------|---------|---------|---------|---------|---------|---------|---------|
| Optical density                    | 0.632   | 0.632   | 0.649   | 0.667   | 0.701   | 0.771   | 0.910   |
| 1,3-diphosphateglycerate           | 470     | 621     | 1460    | 2404    | 4316    | 6108    | 6106    |
| 2,3-dihydroxybenzoate              | 1101    | 745     | 54118   | 172861  | 232250  | 322038  | 440604  |
| 2,3-Diphosphoglyceric acid         | 5933    | 5447    | 9188    | 10449   | 19979   | 32607   | 29440   |
| 2-Hydroxy-2-methylbutanedioic acid | 42109   | 21035   | 9179    | 4703    | 4441    | 3890    | 2253    |
| 2-Isopropylmalic acid              | 135429  | 109116  | 52547   | 18825   | 25588   | 26903   | 22303   |
| 2-oxo-4-methylthiobutanoate        | 4070    | 3465    | 2479    | 848     | 458     | 374     | 785     |
| 3-phosphoglycerate                 | 20713   | 29519   | 31042   | 20544   | 34394   | 32986   | 32550   |
| 5-phosphoribosyl 1-pyrophosphate   | 13837   | 25337   | 64975   | 38204   | 65302   | 59317   | 37000   |
| 6-phospho-D-gluconate              | 14356   | 9531    | 11594   | 4373    | 6959    | 5084    | 3530    |
| acetyl-CoA-nega                    | 4901    | 4727    | 3858    | 3545    | 4332    | 2949    | 2049    |
| acetylphosphate                    | 5170    | 3221    | 4873    | 5285    | 6808    | 9621    | 14112   |
| aconitate                          | 7326    | 5768    | 7717    | 15337   | 18732   | 19728   | 16643   |
| ADP-nega                           | 2760    | 3499    | 1729    | 419     | 615     | 469     | 178     |
| a-ketoglutarate                    | 19360   | 9734    | 12470   | 7764    | 8025    | 8064    | 7440    |
| alanine-CBZ                        | 222589  | 185947  | 469347  | 1035449 | 1068665 | 1206329 | 1294956 |
| alanine-CBZ-C13N15-IS              | 569515  | 388932  | 338871  | 289433  | 274718  | 249478  | 246517  |
| AICAR                              | 100     | 138     | 2446    | 1882    | 2051    | 2229    | 1217    |
| anthranilate                       | 100     | 100     | 164     | 100     | 10649   | 16235   | 23894   |
| arginine-CBZ                       | 4722    | 7672    | 12371   | 8981    | 10648   | 10117   | 6702    |
| Ascorbic acid                      | 584     | 234     | 8523    | 1802    | 11572   | 16352   | 37893   |
| asparagine-CBZ                     | 85281   | 103522  | 142686  | 180647  | 198231  | 201978  | 165030  |
| aspartate-CBZ                      | 193663  | 370771  | 774625  | 927831  | 1043747 | 1036211 | 877917  |
| ATP-nega                           | 73078   | 71000   | 26296   | 8313    | 7660    | 8135    | 6972    |
| citrate                            | 17040   | 19304   | 18876   | 21754   | 28015   | 19196   | 15135   |
| citrate/isocitrate                 | 167514  | 170867  | 141062  | 205238  | 258003  | 172507  | 151308  |
| citrulline-CBZ                     | 18548   | 25791   | 29849   | 24978   | 16254   | 18969   | 13502   |
| coenzyme A-nega                    | 606     | 890     | 1811    | 2395    | 1560    | 1754    | 1263    |
| CTP/UTP-nega-IS                    | 23519   | 25521   | 25648   | 26678   | 26138   | 25304   | 23602   |
| CTP-nega                           | 20947   | 24237   | 16625   | 3649    | 5767    | 4297    | 3736    |
| dATP-nega                          | 5448    | 4602    | 2580    | 1206    | 770     | 980     | 325     |
| dCTP-nega                          | 5469    | 5702    | 5103    | 1412    | 1645    | 1217    | 800     |
| dGDP                               | 2556    | 3631    | 1117    | 1145    | 425     | 997     | 768     |
| D-glucono-δ-lactone-6-phosphate    | 3713    | 4071    | 4019    | 2923    | 4106    | 4334    | 3890    |
| D-glyceraldehyde-3-phosphate       | 487     | 1249    | 2216    | 4273    | 5059    | 5368    | 3506    |
| dihydroorotate                     | 5593    | 8464    | 340     | 182     | 124     | 106     | 100     |
| dihydroxy-acetone phosphate        | 11258   | 10227   | 15802   | 52639   | 44476   | 34990   | 39183   |
| D-sedoheptulose-7-phosphate        | 5429    | 4660    | 6492    | 6094    | 8037    | 6254    | 6028    |
| dTTP-nega                          | 13558   | 11284   | 3808    | 1408    | 355     | 196     | 236     |
| dUMP-nega                          | 100     | 1178    | 12795   | 1776    | 1461    | 1097    | 1333    |
| fructose-1,6-bisphosphate          | 11375   | 15704   | 25939   | 90184   | 90420   | 91141   | 79028   |
| fructose-6-phosphate               | 1465    | 1005    | 3368    | 2940    | 3037    | 3847    | 2926    |
| fumarate C12                       | 973     | 1069    | 1544    | 956     | 1351    | 776     | 815     |
| geranyl-PP                         | 9847    | 10471   | 11029   | 10643   | 11829   | 12081   | 11669   |
| glucose-1-phosphate                | 2016    | 1442    | 3738    | 2873    | 4358    | 1645    | 3096    |
| glucose-6-phosphate                | 2005    | 3336    | 6432    | 5211    | 6169    | 5684    | 4851    |
| glutamate-CBZ                      | 6335557 | 7791006 | 6916042 | 6798112 | 6925970 | 6609872 | 4933444 |
| glutamate-CBZ-C13N15-IS            | 166774  | 140791  | 104755  | 121105  | 112583  | 117930  | 111455  |
| glutamine-CBZ                      | 446575  | 452535  | 583411  | 504063  | 505663  | 486770  | 396814  |
| glutathione disulfide-nega         | 63257   | 75642   | 69478   | 62947   | 51171   | 77936   | 50259   |
| glutathione-nega                   | 96972   | 129183  | 130951  | 97027   | 59811   | 19210   | 37999   |
| glycine-CBZ                        | 415091  | 457873  | 414859  | 415173  | 386950  | 374288  | 345564  |

|                               |         |         |         |         |         |         |         |
|-------------------------------|---------|---------|---------|---------|---------|---------|---------|
| GTP-nega                      | 3818    | 4287    | 841     | 957     | 992     | 634     | 329     |
| hexose-phosphate              | 11521   | 8859    | 20712   | 22922   | 24800   | 23953   | 19013   |
| histidine-CBZ                 | 12637   | 11717   | 19231   | 2551    | 4049    | 3703    | 4099    |
| homocysteine-MMTS             | 32678   | 27879   | 28768   | 24053   | 19343   | 16778   | 11945   |
| Indoleacrylic acid            | 1872    | 1365    | 1507    | 1010    | 926     | 1324    | 940     |
| leucine/isoleucine-CBZ        | 44692   | 40505   | 107184  | 141152  | 138564  | 158932  | 143322  |
| lysine-CBZ                    | 141051  | 208829  | 872415  | 528983  | 542624  | 661985  | 698475  |
| malate                        | 63602   | 41198   | 77975   | 24008   | 32525   | 26138   | 20687   |
| methionine-CBZ                | 5137472 | 5437916 | 5245103 | 4741120 | 4965412 | 4749038 | 4349665 |
| Methylmalonic acid            | 53074   | 29951   | 47194   | 26970   | 30314   | 25091   | 20114   |
| N-Acetyl-L-alanine            | 205     | 100     | 145     | 100     | 533     | 1254    | 1242    |
| NAD+_nega                     | 28573   | 33341   | 40886   | 43331   | 52043   | 55520   | 52402   |
| NADP+_nega                    | 15700   | 17401   | 17302   | 17213   | 14481   | 12202   | 4265    |
| NADPH_nega                    | 3841    | 4038    | 3808    | 2538    | 1846    | 1754    | 1038    |
| N-Carbamoyl-L-aspartate       | 27897   | 22788   | 775     | 173     | 239     | 100     | 100     |
| ornithine-CBZ                 | 10882   | 10929   | 74713   | 46354   | 28599   | 29567   | 17998   |
| orotate                       | 30102   | 16660   | 3978    | 1857    | 1467    | 1412    | 649     |
| pantothenate                  | 100     | 100     | 158     | 1864    | 4638    | 4172    | 1522    |
| phenylalanine-CBZ             | 719     | 387     | 8751    | 14646   | 17795   | 22864   | 21173   |
| phenylpyruvate                | 2598    | 974     | 5563    | 10838   | 15543   | 19555   | 12737   |
| phosphoenolpyruvate           | 1802    | 2311    | 5712    | 7044    | 12913   | 12858   | 15575   |
| p-hydroxybenzoate             | 1249    | 819     | 1260    | 1369    | 1839    | 1332    | 1958    |
| prephenate                    | 1111    | 757     | 8757    | 15615   | 18096   | 21751   | 26313   |
| proline-CBZ                   | 67550   | 59735   | 56342   | 21244   | 19804   | 18430   | 15550   |
| pyruvate                      | 953     | 959     | 5090    | 2020    | 5213    | 7090    | 8983    |
| quinolinate                   | 15252   | 12346   | 14625   | 13521   | 12795   | 14150   | 11854   |
| ribose-phosphate              | 7924    | 7731    | 15233   | 12225   | 12250   | 12229   | 12467   |
| S-adenosyl-L-methionine MMTS  | 5625    | 2996    | 4636    | 3834    | 5202    | 5389    | 6464    |
| S-adenosyl-L-methionine pos   | 9764    | 4320    | 5153    | 5552    | 3917    | 7527    | 9161    |
| serine-CBZ                    | 57063   | 39658   | 71192   | 8120    | 8178    | 5576    | 5534    |
| shikimate-3-phosphate         | 524     | 420     | 297     | 711     | 1618    | 1077    | 1761    |
| sn-glycerol-3-phosphate       | 3986    | 4265    | 3112    | 5032    | 7450    | 5026    | 4772    |
| S-ribosyl-L-homocysteine-nega | 378     | 382     | 220     | 295     | 269     | 451     | 141     |
| succinate C12                 | 1284    | 582     | 1675    | 905     | 958     | 523     | 436     |
| threonine-CBZ                 | 63041   | 55482   | 118594  | 66463   | 61338   | 67767   | 56056   |
| threonine-CBZ-C13             | 7542    | 6257    | 3936    | 3317    | 3911    | 3365    | 3943    |
| trehalose                     | 243     | 100     | 100     | 112     | 100     | 293     | 928     |
| trehalose 6-Phosphate         | 100     | 100     | 152     | 100     | 530     | 798     | 1217    |
| trptophan-CBZ                 | 4728    | 3642    | 25383   | 37391   | 19167   | 23108   | 15435   |
| tyrosine-CBZ                  | 6974    | 5933    | 109899  | 323015  | 346044  | 390270  | 362624  |
| UDP-D-glucose                 | 294122  | 336048  | 422503  | 378274  | 439688  | 548520  | 453208  |
| UDP-D-glucuronate             | 100278  | 84995   | 106272  | 67756   | 69826   | 61832   | 55939   |
| UDP-N-acetyl-glucosamine      | 64970   | 76664   | 45836   | 30372   | 38359   | 38713   | 29659   |
| UDP-nega                      | 1171    | 1750    | 1468    | 1209    | 787     | 1155    | 339     |
| UTP-nega                      | 31465   | 37366   | 32239   | 17208   | 18863   | 20195   | 17893   |
| valine-CBZ                    | 70135   | 65759   | 378579  | 2205387 | 2008258 | 2327194 | 1866081 |

**Trimethoprim (4 µg/ml) + 0.3 mM gly + ino replicate 1 raw data**

| Time (min)                         | 0       | 1     | 5       | 15      | 30      | 60      | 120     |
|------------------------------------|---------|-------|---------|---------|---------|---------|---------|
| Optical density                    | 0.400   | 0.400 | 0.413   | 0.425   | 0.450   | 0.500   | 0.600   |
| 2,3-dihydroxybenzoate              | 1050    | 328   | 5077    | 30552   | 34304   | 33855   | 26160   |
| 2,3-Diphosphoglyceric acid         | 214     | 436   | 196     | 748     | 733     | 796     | 432     |
| 2-Hydroxy-2-methylbutanedioic acid | 30178   | 14335 | 10056   | 10781   | 9340    | 8396    | 10520   |
| 2-Isopropylmalic acid              | 44457   | 28751 | 19165   | 12047   | 8283    | 11122   | 20258   |
| 3-phosphoglycerate                 | 2647    | 1822  | 2161    | 2567    | 2288    | 2101    | 3296    |
| 5-phosphoribosyl 1-pyrophosphate   | 3912    | 4184  | 5274    | 6184    | 3100    | 1678    | 2648    |
| 6-phospho-D-gluconate              | 2216    | 1883  | 1187    | 106     | 327     | 257     | 467     |
| acetyl-CoA-nega                    | 9927    | 9549  | 7614    | 6417    | 4762    | 2842    | 2975    |
| acetylphosphate                    | 6026    | 4036  | 3893    | 4527    | 5036    | 6729    | 5904    |
| aconitate                          | 1566    | 685   | 711     | 1400    | 2173    | 1727    | 1730    |
| adenosine 5'-phosphosulfate        | 322     | 390   | 423     | 452     | 427     | 869     | 211     |
| ADP-nega                           | 673     | 825   | 611     | 735     | 385     | 627     | 1457    |
| a-ketoglutarate                    | 3527    | 3721  | 4518    | 5171    | 5493    | 5030    | 6515    |
| alanine-CBZ                        | 215913  |       | 205481  | 511415  | 611520  | 603300  | 370070  |
| alanine-CBZ-C13N15-IS              | 257587  |       | 286378  | 243535  | 247668  | 263512  | 223991  |
| AICAR                              | 100     | 461   | 2061    | 5593    | 7873    | 3009    | 4257    |
| arginine-CBZ                       | 4787    | 100   | 66      | 12837   | 15181   | 17121   | 10768   |
| Ascorbic acid                      | 176     | 100   | 100     | 100     | 1088    | 2128    | 12191   |
| asparagine-CBZ                     | 24030   |       | 35796   | 53507   | 53728   | 64547   | 35289   |
| Aspartate-(U-13C/15N)-(neg)        | 4039    | 5062  | 4509    | 4546    | 4886    | 4740    | 4044    |
| aspartate-CBZ                      | 78639   |       | 139206  | 196011  | 169502  | 203941  | 110858  |
| ATP-nega                           | 15389   | 14456 | 15766   | 19987   | 19566   | 20302   | 20292   |
| carbamoyl-phosphate                | 265     | 179   | 525     | 604     | 1030    | 778     | 951     |
| Cholesteryl sulfate                | 166     | 246   | 132     | 304     | 180     | 448     | 382     |
| citrate                            | 2149    | 2800  | 2728    | 2917    | 2763    | 2539    | 2528    |
| citrate/isocitrate                 | 26789   | 23699 | 20060   | 19089   | 26179   | 16730   | 24200   |
| citrulline-CBZ                     | 10225   |       | 8317    | 13865   | 11760   | 10829   | 13113   |
| coenzyme A-nega                    | 280     | 300   | 672     | 662     | 488     | 519     | 632     |
| CTP/UTP-nega-IS                    | 8260    | 10465 | 12245   | 11093   | 10721   | 11934   | 13237   |
| CTP-nega                           | 5406    | 4842  | 5508    | 9567    | 9937    | 8112    | 11317   |
| dATP-nega                          | 1328    | 1581  | 1075    | 2994    | 4046    | 3644    | 2910    |
| dCTP-nega                          | 942     | 1346  | 1585    | 1348    | 896     | 1259    | 1248    |
| D-glucono-δ-lactone-6-phosphate    | 460     | 776   | 556     | 503     | 520     | 223     | 519     |
| D-glyceraldehyde-3-phosphate       | 1571    | 1880  | 1542    | 1866    | 1941    | 2272    | 2483    |
| dihydroxy-acetone phosphate        | 2552    | 1711  | 2167    | 2519    | 2434    | 2116    | 2695    |
| D-sedoheptulose-7-phosphate        | 2801    | 2394  | 1870    | 1638    | 1121    | 1254    | 1859    |
| dTTP-nega                          | 3524    | 3907  | 1917    | 1151    | 209     | 168     | 100     |
| dUMP-nega                          | 100     | 660   | 10687   | 12239   | 10943   | 10395   | 8810    |
| fructose-1,6-bisphosphate          | 28252   | 36411 | 31805   | 26061   | 26528   | 15878   | 17540   |
| fructose-6-phosphate               | 599     | 453   | 1229    | 786     | 587     | 624     | 216     |
| fumarate 3-3                       | 100     | 100   | 100     | 100     | 164     | 657     | 2336    |
| geranyl-PP                         | 512     | 808   | 334     | 372     | 628     | 455     | 658     |
| glucose-1-phosphate                | 262     | 324   | 292     | 634     | 317     | 268     | 325     |
| glutamate-CBZ                      | 5309526 | 219   | 6214422 | 7394751 | 7507679 | 8311465 | 7234194 |
| glutamate-CBZ-C13N15-IS            | 89697   |       | 90447   | 76624   | 70431   | 72922   | 61657   |
| glutamine-CBZ                      | 255443  |       | 333950  | 453135  | 458145  | 539292  | 303259  |
| glutathione disulfide-nega         | 7618    | 6558  | 8180    | 10656   | 8485    | 5881    | 9995    |
| glutathione-nega                   | 77477   | 79056 | 72892   | 62743   | 58343   | 48998   | 44306   |
| glycine-CBZ                        | 249073  |       | 351602  | 381979  | 374384  | 377977  | 395196  |
| GTP-nega                           | 5450    | 7012  | 5202    | 9226    | 7255    | 7105    | 6663    |
| hexose-phosphate                   | 6560    | 5211  | 5744    | 6402    | 5087    | 5055    | 5088    |

|                               |        |        |        |         |         |         |         |
|-------------------------------|--------|--------|--------|---------|---------|---------|---------|
| histidine-CBZ                 | 4700   |        | 4445   | 2632    | 2675    | 3058    | 3462    |
| homocysteine-MMTS             | 32553  | 32175  | 109513 | 115805  | 128262  | 116517  | 164488  |
| hypoxanthine                  | 2418   | 1412   | 1510   | 2930    | 2653    | 3104    | 3200    |
| Indoleacrylic acid            | 1437   | 622    | 1142   | 895     | 582     | 389     | 433     |
| inosine                       | 233499 | 326971 | 338183 | 269207  | 256818  | 250224  | 241004  |
| leucine/isoleucine-CBZ        | 34222  |        | 43104  | 314106  | 628388  | 908055  | 920845  |
| lysine-CBZ                    | 178330 |        | 288679 | 1064106 | 1523190 | 1885373 | 1513764 |
| malate                        | 10273  | 7357   | 10116  | 14564   | 11326   | 9853    | 10663   |
| Maleic acid                   | 940    | 789    | 1182   | 921     | 846     | 584     | 724     |
| methionine-CBZ                | 17538  |        | 4015   | 1418    | 956     | 1174    | 8920    |
| Methylmalonic acid            | 40319  | 16984  | 18717  | 18599   | 16892   | 15733   | 36332   |
| NAD+_nega                     | 27681  | 26065  | 23136  | 32977   | 34641   | 37647   | 40005   |
| NADP+_nega                    | 8715   | 10426  | 5354   | 9033    | 5162    | 6080    | 8249    |
| NADPH_nega                    | 2336   | 2442   | 2927   | 3753    | 1988    | 2863    | 4240    |
| N-Carbamoyl-L-aspartate       | 6622   | 7304   | 6430   | 5725    | 4577    | 2443    | 2004    |
| ornithine-CBZ                 | 17659  |        | 18376  | 14437   | 10100   | 8550    | 20320   |
| orotate                       | 6384   | 3063   | 2734   | 4235    | 4630    | 4415    | 8183    |
| phenylalanine-CBZ             | 260    |        | 1270   | 2788    | 3627    | 2848    | 2351    |
| phenylpyruvate                | 130    | 100    | 100    | 547     | 1405    | 948     | 1172    |
| phosphoenolpyruvate           | 604    | 472    | 99     | 917     | 562     | 1019    | 1111    |
| p-hydroxybenzoate             | 844    | 290    | 429    | 924     | 690     | 615     | 842     |
| prephenate                    | 130    | 100    | 100    | 2027    | 2568    | 1951    | 1473    |
| proline-CBZ                   | 37638  |        | 40026  | 54461   | 98004   | 124632  | 115893  |
| pyruvate                      | 408    | 269    | 199    | 530     | 409     | 1444    | 3328    |
| ribose-phosphate              | 6101   | 10313  | 15205  | 6668    | 5306    | 4545    | 4626    |
| S-adenosyl-L-methionine       | 6054   | 2815   | 341    | 100     | 257     | 100     | 100     |
| S-adenosyl-L-methionine - POS | 3988   | 2645   | 100    | 177     | 100     | 100     | 490     |
| serine-CBZ                    | 8269   |        | 3469   | 2883    | 3131    | 2893    | 5673    |
| shikimate-3-phosphate         | 2390   | 1779   | 2496   | 1732    | 2732    | 1609    | 1182    |
| sn-glycerol-3-phosphate       | 488    | 697    | 161    | 462     | 582     | 661     | 460     |
| S-ribosyl-L-homocysteine-nega | 197    | 783    | 330    | 1026    | 3189    | 5155    | 5920    |
| succinate C12                 | 1469   | 418    | 259    | 275     | 662     | 354     | 997     |
| threonine-CBZ                 | 37556  |        | 43744  | 102986  | 175501  | 390466  | 807660  |
| threonine-CBZ-C13             | 3721   |        | 3755   | 4167    | 3746    | 3633    | 2152    |
| trptophan-CBZ                 | 1721   |        | 3727   | 8262    | 8980    | 6903    | 7134    |
| tyrosine-CBZ                  | 2684   |        | 16992  | 53184   | 80808   | 78303   | 69685   |
| UDP-D-glucose                 | 106867 | 117429 | 110444 | 122696  | 121471  | 122413  | 120978  |
| UDP-D-glucuronate             | 36929  | 36989  | 32330  | 39837   | 33986   | 34369   | 31894   |
| UDP-N-acetyl-glucosamine      | 24698  | 23225  | 23167  | 33601   | 35624   | 32313   | 26721   |
| uracil                        | 100    | 100    | 100    | 100     | 112     | 170     | 1060    |
| UTP-nega                      | 9237   | 10528  | 12687  | 21755   | 19996   | 19581   | 22430   |
| valine-CBZ                    | 53087  |        | 71670  | 840396  | 1018784 | 370489  | 155204  |
| xanthosine                    | 1031   | 394    | 633    | 467     | 442     | 374     | 731     |

**Trimethoprim (4 µg/ml) + 0.3 mM gly + ino replicate 2 raw data**

| Time (min)                         | 0       | 1       | 5       | 15    | 30      | 60      | 120     |
|------------------------------------|---------|---------|---------|-------|---------|---------|---------|
| Optical density                    | 0.400   | 0.400   | 0.413   | 0.425 | 0.450   | 0.500   | 0.600   |
| 2,3-dihydroxybenzoate              | 469     | 358     | 7005    | 40564 | 39976   | 47991   | 28222   |
| 2,3-Diphosphoglyceric acid         | 476     | 588     | 784     | 1557  | 783     | 1175    | 1243    |
| 2-Hydroxy-2-methylbutanedioic acid | 34224   | 10758   | 7911    | 10075 | 9060    | 12824   | 12340   |
| 2-Isopropylmalic acid              | 43514   | 28026   | 21242   | 11577 | 11142   | 14156   | 18900   |
| 3-phosphoglycerate                 | 2927    | 2695    | 1673    | 2501  | 2281    | 2346    | 3331    |
| 5-phosphoribosyl 1-pyrophosphate   | 4995    | 4110    | 9325    | 7941  | 3492    | 4019    | 2138    |
| 6-phospho-D-gluconate              | 3555    | 1153    | 1829    | 348   | 159     | 229     | 1011    |
| acetyl-CoA-nega                    | 3020    | 3931    | 5231    | 5895  | 9293    | 11181   | 8449    |
| acetylphosphate                    | 6142    | 3707    | 3848    | 5052  | 5860    | 5953    | 4957    |
| aconitate                          | 1290    | 864     | 1117    | 1126  | 1317    | 2788    | 1651    |
| adenosine 5'-phosphosulfate        | 987     | 131     | 706     | 801   | 989     | 1074    | 700     |
| ADP-nega                           | 1168    | 1197    | 942     | 724   | 868     | 843     | 987     |
| a-ketoglutarate                    | 3808    | 3286    | 5529    | 5663  | 6180    | 5451    | 8120    |
| alanine-CBZ                        | 208495  | 180269  | 200045  | 147   | 531841  | 516411  | 434520  |
| alanine-CBZ-C13N15-IS              | 263611  | 278857  | 223312  | 95    | 218246  | 184971  | 218578  |
| AICAR                              | 243     | 112     | 2728    | 5397  | 3137    | 4834    | 4878    |
| arginine-CBZ                       | 4787    | 100     | 100     | 100   | 15187   | 17121   | 12761   |
| Ascorbic acid                      | 422     | 100     | 100     | 176   | 1167    | 2626    | 14053   |
| asparagine-CBZ                     | 22292   | 31334   | 35573   |       | 50242   | 44562   | 49117   |
| Aspartate-(U-13C/15N)-(neg)        | 3492    | 3959    | 4665    | 4568  | 3926    | 3512    | 3576    |
| aspartate-CBZ                      | 86080   | 101682  | 168637  |       | 179409  | 137999  | 136100  |
| ATP-nega                           | 17290   | 18043   | 18268   | 23436 | 31271   | 34450   | 22673   |
| carbamoyl-phosphate                | 110     | 273     | 272     | 821   | 1006    | 1062    | 1469    |
| Cholesteryl sulfate                | 396     | 316     | 191     | 290   | 304     | 313     | 539     |
| citrate                            | 2913    | 2973    | 4134    | 3132  | 3726    | 3391    | 1750    |
| citrate/isocitrate                 | 24401   | 25245   | 30754   | 25676 | 20607   | 38284   | 14705   |
| citrulline-CBZ                     | 9523    | 11405   | 9439    |       | 13201   | 9596    | 14144   |
| coenzyme A-nega                    | 608     | 284     | 592     | 825   | 2517    | 2798    | 616     |
| CTP/UTP-nega-IS                    | 10024   | 12591   | 11955   | 12516 | 12997   | 13979   | 11182   |
| CTP-nega                           | 7211    | 8811    | 6435    | 13690 | 12407   | 17164   | 11828   |
| dATP-nega                          | 1596    | 2032    | 2577    | 3605  | 7542    | 6188    | 4102    |
| dCTP-nega                          | 1695    | 1387    | 1284    | 1841  | 1343    | 1119    | 1273    |
| D-glucono-δ-lactone-6-phosphate    | 453     | 234     | 346     | 779   | 420     | 779     | 771     |
| D-glyceraldehyde-3-phosphate       | 2052    | 2499    | 1987    | 2172  | 2870    | 2247    | 2601    |
| dihydroxy-acetone phosphate        | 1804    | 1906    | 2515    | 2706  | 3411    | 2271    | 2154    |
| D-sedoheptulose-7-phosphate        | 3770    | 1972    | 2457    | 1783  | 1136    | 1186    | 1488    |
| dTTP-nega                          | 4354    | 4887    | 1721    | 1099  | 632     | 243     | 214     |
| dUMP-nega                          | 100     | 708     | 9005    | 9883  | 10870   | 13176   | 14686   |
| fructose-1,6-bisphosphate          | 34432   | 51786   | 40290   | 29476 | 22616   | 19258   | 13098   |
| fructose-6-phosphate               | 1176    | 656     | 521     | 912   | 340     | 1031    | 561     |
| fumarate 3-3                       | 100     | 100     | 150     | 123   | 143     | 623     | 1986    |
| geranyl-PP                         | 452     | 668     | 478     | 455   | 798     | 459     | 347     |
| glucose-1-phosphate                | 744     | 901     | 368     | 885   | 164     | 340     | 403     |
| glutamate-CBZ                      | 6061156 | 6886865 | 7229650 |       | 7972799 | 7514420 | 7906313 |
| glutamate-CBZ-C13N15-IS            | 85133   | 78988   | 77407   |       | 63446   | 50564   | 64618   |
| glutamine-CBZ                      | 252708  | 304684  | 345129  |       | 434895  | 369463  | 417893  |
| glutathione disulfide-nega         | 18372   | 17882   | 19873   | 21169 | 24225   | 23786   | 11006   |
| glutathione-nega                   | 60891   | 65388   | 65652   | 67660 | 46964   | 41414   | 36419   |
| glycine-CBZ                        | 252369  | 386887  | 389840  |       | 390945  | 369140  | 401345  |
| GTP-nega                           | 8248    | 6721    | 8397    | 14795 | 12292   | 11933   | 6159    |
| hexose-phosphate                   | 8522    | 7030    | 8220    | 6599  | 4683    | 6252    | 4396    |

|                               |        |        |        |        |         |         |         |
|-------------------------------|--------|--------|--------|--------|---------|---------|---------|
| histidine-CBZ                 | 6836   | 7016   | 6291   |        | 3279    | 3186    | 2919    |
| homocysteine-MMTS             | 23318  | 23961  | 81572  | 92836  | 98744   | 88745   | 136116  |
| hypoxanthine                  | 2782   | 1025   | 2012   | 2836   | 3495    | 4062    | 3895    |
| Indoleacrylic acid            | 660    | 1319   | 1509   | 990    | 756     | 1103    | 897     |
| inosine                       | 216555 | 351358 | 337342 | 307709 | 304147  | 286202  | 239642  |
| leucine/isoleucine-CBZ        | 34042  | 38290  | 48079  |        | 583967  | 990550  | 1085204 |
| lysine-CBZ                    | 172640 | 213279 | 291857 |        | 1391534 | 1400903 | 1957773 |
| malate                        | 13379  | 8099   | 9732   | 15014  | 15616   | 13888   | 13986   |
| Maleic acid                   | 666    | 1141   | 1186   | 952    | 1094    | 1087    | 530     |
| methionine-CBZ                | 18248  | 14469  | 4082   |        | 736     | 1116    | 1409    |
| Methylmalonic acid            | 18666  | 16107  | 17842  | 21125  | 17496   | 19319   | 17559   |
| NAD+_nega                     | 27316  | 27967  | 28304  | 34212  | 45797   | 52358   | 48035   |
| NADP+_nega                    | 8290   | 8876   | 8535   | 8568   | 11823   | 9826    | 12556   |
| NADPH_nega                    | 3501   | 2547   | 3464   | 2808   | 5315    | 5846    | 3903    |
| N-Carbamoyl-L-aspartate       | 9234   | 8061   | 6167   | 6823   | 5014    | 3378    | 3023    |
| ornithine-CBZ                 | 18688  | 20128  | 14774  |        | 10041   | 8461    | 21171   |
| orotate                       | 7210   | 3485   | 3426   | 3639   | 5480    | 5765    | 9350    |
| phenylalanine-CBZ             | 260    | 378    | 1437   |        | 2679    | 4208    | 2699    |
| phenylpyruvate                | 159    | 100    | 185    | 399    | 1165    | 1982    | 2399    |
| phosphoenolpyruvate           | 251    | 632    | 534    | 817    | 1063    | 828     | 1328    |
| p-hydroxybenzoate             | 704    | 172    | 242    | 487    | 671     | 1013    | 964     |
| prephenate                    | 131    | 190    | 592    | 2324   | 2939    | 2111    | 2074    |
| proline-CBZ                   | 51486  | 37931  | 43890  |        | 106124  | 163950  | 152905  |
| pyruvate                      | 508    | 264    | 101    | 414    | 952     | 1963    | 4463    |
| ribose-phosphate              | 6988   | 14709  | 15662  | 8076   | 5531    | 5056    | 4781    |
| S-adenosyl-L-methionine       | 4319   | 2901   | 668    | 100    | 100     | 100     | 100     |
| S-adenosyl-L-methionine - POS | 4398   | 1935   | 394    | 241    | 100     | 100     | 100     |
| serine-CBZ                    | 10070  | 7535   | 3723   |        | 2913    | 3944    | 3722    |
| shikimate-3-phosphate         | 1647   | 1193   | 2011   | 1370   | 1392    | 1402    | 1715    |
| sn-glycerol-3-phosphate       | 633    | 778    | 519    | 629    | 348     | 352     | 486     |
| S-ribosyl-L-homocysteine-nega | 348    | 302    | 163    | 986    | 2615    | 5307    | 8358    |
| succinate C12                 | 699    | 432    | 422    | 368    | 271     | 493     | 236     |
| threonine-CBZ                 | 40206  | 38492  | 48127  |        | 189694  | 373994  | 952161  |
| threonine-CBZ-C13             | 3268   | 3180   | 3551   |        | 2998    | 2399    | 2943    |
| trptophan-CBZ                 | 2203   | 2228   | 6338   |        | 9272    | 9998    | 7192    |
| tyrosine-CBZ                  | 3036   | 4713   | 21168  |        | 85192   | 118205  | 98102   |
| UDP-D-glucose                 | 111610 | 100478 | 121043 | 133991 | 149682  | 163263  | 148406  |
| UDP-D-glucuronate             | 42620  | 39634  | 45986  | 46853  | 48016   | 49699   | 44431   |
| UDP-N-acetyl-glucosamine      | 23564  | 15047  | 26582  | 30601  | 46989   | 48015   | 36394   |
| uracil                        | 100    | 100    | 100    | 100    | 235     | 867     | 852     |
| UTP-nega                      | 11389  | 11769  | 19867  | 25887  | 30913   | 33297   | 25323   |
| valine-CBZ                    | 56515  | 61196  | 93121  |        | 1163685 | 441656  | 178017  |
| xanthosine                    | 608    | 396    | 185    | 868    | 1100    | 466     | 772     |

**Trimethoprim (4 µg/ml) + 0.3 mM gly + ino + met replicate 1 raw data**

| Time (min)                         | 0       | 1       | 5       | 15      | 30      | 60      | 120     |
|------------------------------------|---------|---------|---------|---------|---------|---------|---------|
| Optical density                    | 0.470   | 0.470   | 0.503   | 0.536   | 0.601   | 0.733   | 0.995   |
| 1,3-diphosphateglycerate           | 100     | 100     | 117     | 603     | 358     | 399     | 625     |
| 2,3-dihydroxybenzoate              | 548     | 570     | 21162   | 79907   | 155919  | 280457  | 391193  |
| 2,3-Diphosphoglyceric acid         | 272     | 495     | 1670    | 1613    | 2674    | 3534    | 3104    |
| 2-Hydroxy-2-methylbutanedioic acid | 24805   | 12075   | 9213    | 10307   | 11340   | 15533   | 33555   |
| 2-Isopropylmalic acid              | 115857  | 78143   | 68445   | 50924   | 71451   | 92051   | 121044  |
| 2-oxo-4-methylthiobutanoate        | 1801    | 1105    | 1758    | 2002    | 1161    | 2581    | 3841    |
| 3-phosphoglycerate                 | 5009    | 6268    | 8206    | 8761    | 6670    | 8676    | 13850   |
| 5-phosphoribosyl 1-pyrophosphate   | 1291    | 1525    | 3771    | 3265    | 11209   | 17347   | 9866    |
| 6-phospho-D-gluconate              | 5593    | 5490    | 5804    | 2676    | 3129    | 2627    | 4626    |
| acetyl-CoA-nega                    | 2147    | 4171    | 3575    | 4903    | 8267    | 5791    | 8246    |
| acetylphosphate                    | 9250    | 7156    | 7853    | 11709   | 15732   | 30606   | 54230   |
| aconitate                          | 2051    | 833     | 803     | 1406    | 951     | 1533    | 2463    |
| adenosine 5'-phosphosulfate        | 236     | 815     | 652     | 589     | 788     | 453     | 815     |
| ADP-nega                           | 406     | 270     | 528     | 993     | 1059    | 623     | 1136    |
| a-ketoglutarate                    | 5601    | 4151    | 6014    | 8125    | 8305    | 8578    | 13094   |
| alanine-CBZ                        | 100249  | 94294   | 182780  | 191574  | 207748  | 222081  | 296246  |
| alanine-CBZ-C13N15-IS              | 349179  | 395158  | 377288  | 330407  | 392462  | 408797  | 381651  |
| AICAR                              | 100     | 100     | 354     | 1422    | 1959    | 2392    | 2489    |
| arginine-CBZ                       | 2776    | 3472    | 3174    | 3910    | 6339    | 8487    | 13667   |
| Ascorbic acid                      | 100     | 103     | 194     | 6522    | 5630    | 7088    | 19989   |
| asparagine-CBZ                     | 63989   | 72873   | 92946   | 75829   | 143394  | 169290  | 219470  |
| Aspartate-(U-13C/15N)-(neg)        | 4381    | 4364    | 5627    | 6008    | 4276    | 4791    | 5549    |
| aspartate-CBZ                      | 90858   | 118336  | 199057  | 161832  | 300992  | 381317  | 451327  |
| ATP-nega                           | 15211   | 17175   | 24018   | 25337   | 24481   | 37976   | 44948   |
| carbamoyl-phosphate                | 130     | 140     | 145     | 260     | 339     | 482     | 1471    |
| citrate                            | 2969    | 2911    | 3253    | 3030    | 3433    | 3189    | 2860    |
| citrate/isocitrate                 | 21242   | 21231   | 25620   | 22214   | 21818   | 20325   | 21044   |
| citrulline-CBZ                     | 13867   | 13528   | 18779   | 18319   | 20780   | 23748   | 26462   |
| CTP/UTP-nega-IS                    | 6395    | 12320   | 17755   | 18169   | 20111   | 20776   | 25624   |
| CTP-nega                           | 2513    | 4329    | 6528    | 5728    | 8433    | 11129   | 15956   |
| dATP-nega                          | 366     | 660     | 1939    | 4861    | 6687    | 8160    | 11669   |
| dCTP-nega                          | 652     | 806     | 2331    | 1055    | 1844    | 5132    | 17969   |
| D-glucono-δ-lactone-6-phosphate    | 400     | 350     | 382     | 350     | 914     | 453     | 813     |
| D-glyceraldehyde-3-phosphate       | 5423    | 5143    | 5701    | 6924    | 6278    | 9658    | 12344   |
| dihydroorotate                     | 655     | 421     | 406     | 1582    | 1546    | 798     | 1221    |
| dihydroxy-acetone phosphate        | 5943    | 6618    | 6296    | 6773    | 7591    | 9125    | 11450   |
| D-sedoheptulose-7-phosphate        | 5978    | 4028    | 3911    | 2196    | 4006    | 3973    | 4185    |
| dTTP-nega                          | 2339    | 3025    | 768     | 113     | 115     | 12.56   | 31.52   |
| dUMP-nega                          | 100     | 1411    | 24463   | 19676   | 12997   | 25670   | 34388   |
| dUTP-nega                          | 128     | 100     | 133     | 100     | 100     | 479     | 1207    |
| fructose-1,6-bisphosphate          | 6831    | 8116    | 9798    | 7794    | 7419    | 11344   | 9484    |
| fructose-6-phosphate               | 1197    | 863     | 1124    | 1389    | 1387    | 720     | 639     |
| geranyl-PP                         | 2407    | 2472    | 1988    | 1691    | 1713    | 1849    | 1779    |
| glucose-1-phosphate                | 1219    | 437     | 527     | 943     | 1235    | 850     | 909     |
| glutamate-CBZ                      | 4068959 | 4555198 | 5580247 | 5553068 | 7088445 | 8323690 | 9532798 |
| glutamate-CBZ-C13N15-IS            | 168024  | 179029  | 162828  | 141137  | 152639  | 145346  | 121284  |
| glutamine-CBZ                      | 273384  | 272604  | 368957  | 328186  | 495716  | 642609  | 771458  |
| glutathione disulfide-nega         | 3579    | 5422    | 7531    | 6939    | 12776   | 13408   | 20303   |
| glutathione-nega                   | 61237   | 59398   | 63188   | 67574   | 85566   | 100091  | 132693  |
| glycine-CBZ                        | 549941  | 613564  | 624235  | 571762  | 575775  | 550710  | 462551  |
| GTP-nega                           | 5292    | 8910    | 16179   | 13469   | 19475   | 19848   | 25391   |

|                               |         |         |         |         |         |         |         |
|-------------------------------|---------|---------|---------|---------|---------|---------|---------|
| hexose-phosphate              | 13482   | 9304    | 10254   | 9165    | 11110   | 12024   | 11310   |
| histidine-CBZ                 | 6181    | 5934    | 5962    | 3865    | 5837    | 6107    | 8036    |
| homocysteine-MMTS             | 18864   | 14788   | 13306   | 17175   | 18697   | 34279   | 62855   |
| Indoleacrylic acid            | 2006    | 1554    | 2210    | 1722    | 1832    | 1637    | 1984    |
| leucine/isoleucine-CBZ        | 39781   | 32451   | 55901   | 51230   | 57563   | 55602   | 60506   |
| lysine-CBZ                    | 114745  | 142297  | 255858  | 185899  | 305304  | 483325  | 838838  |
| malate                        | 23217   | 22191   | 30289   | 30185   | 35217   | 41321   | 53821   |
| methionine-CBZ                | 6179159 | 6455093 | 6542015 | 5694447 | 6108255 | 6309812 | 6305593 |
| NAD+_nega                     | 23494   | 25626   | 27043   | 29652   | 38161   | 52009   | 60567   |
| NADP+_nega                    | 5165    | 6602    | 6332    | 5627    | 7301    | 8173    | 10083   |
| NADPH_nega                    | 2479    | 1925    | 3503    | 4533    | 4613    | 5700    | 4931    |
| N-Carbamoyl-L-aspartate       | 25652   | 25612   | 22406   | 67860   | 31283   | 15977   | 10702   |
| ornithine-CBZ                 | 12828   | 13399   | 19549   | 16535   | 28262   | 31983   | 45220   |
| orotate                       | 7188    | 5130    | 6028    | 15365   | 15336   | 20884   | 23694   |
| phenylalanine-CBZ             | 219     | 151     | 2914    | 2480    | 3112    | 4109    | 5307    |
| phenylpyruvate                | 1530    | 396     | 459     | 1568    | 2549    | 3885    | 7013    |
| phosphoenolpyruvate           | 506     | 601     | 989     | 1104    | 1360    | 2439    | 3625    |
| p-hydroxybenzoate             | 521     | 439     | 792     | 974     | 1419    | 1709    | 2406    |
| prephenate                    | 280     | 221     | 1920    | 3017    | 3478    | 6471    | 8425    |
| proline-CBZ                   | 32494   | 29418   | 29984   | 36725   | 42922   | 67225   | 93038   |
| pyruvate                      | 321     | 131     | 686     | 2611    | 2725    | 4884    | 5755    |
| ribose-phosphate              | 7432    | 13074   | 11726   | 7833    | 8032    | 16312   | 16656   |
| S-adenosyl-L-methionine       | 3441    | 2055    | 3863    | 2671    | 2250    | 3438    | 3982    |
| S-adenosyl-L-methionine MMTS  | 5261    | 2023    | 3517    | 3069    | 3208    | 4827    | 4899    |
| serine-CBZ                    | 24455   | 15713   | 7889    | 8214    | 13089   | 12703   | 15912   |
| shikimate-3-phosphate         | 1098    | 1605    | 725     | 1113    | 1137    | 1533    | 1056    |
| sn-glycerol-3-phosphate       | 1124    | 422     | 1683    | 1238    | 2149    | 2451    | 3774    |
| S-ribosyl-L-homocysteine-nega | 222     | 248     | 199     | 450     | 442     | 544     | 1744    |
| succinate C12                 | 510     | 239     | 157     | 402     | 362     | 196     | 555     |
| threonine-CBZ                 | 40493   | 38584   | 66505   | 61786   | 74722   | 102203  | 117919  |
| threonine-CBZ-C13             | 8609    | 9063    | 7753    | 7537    | 9322    | 8566    | 9111    |
| trptophan-CBZ                 | 3608    | 2586    | 11298   | 11174   | 12610   | 16475   | 15763   |
| tyrosine-CBZ                  | 2359    | 2667    | 19958   | 26534   | 29192   | 37360   | 48051   |
| UDP-D-glucose                 | 175233  | 179441  | 184011  | 138106  | 279222  | 341992  | 326630  |
| UDP-D-glucuronate             | 43994   | 37449   | 43149   | 40700   | 61530   | 71060   | 61854   |
| UDP-N-acetyl-glucosamine      | 33840   | 34325   | 36929   | 49092   | 69261   | 62866   | 65702   |
| UTP-nega                      | 10347   | 11461   | 13693   | 12618   | 33129   | 42073   | 58650   |
| valine-CBZ                    | 34592   | 29685   | 86663   | 97099   | 61258   | 81714   | 164924  |
| xanthosine                    | 1041    | 1476    | 953     | 1442    | 3499    | 2688    | 2534    |



**Trimethoprim (4 µg/ml) + 0.3 mM gly + ino + met replicate 2 raw data**

| Time (min)                         | 0       | 1       | 5       | 15      | 30      | 60      | 120     |
|------------------------------------|---------|---------|---------|---------|---------|---------|---------|
| Optical density                    | 0.470   | 0.470   | 0.503   | 0.536   | 0.601   | 0.733   | 0.995   |
| 1,3-diphosphateglycerate           | 100     | 154     | 163     | 429     | 269     | 978     | 673     |
| 2,3-dihydroxybenzoate              | 1497    | 198     | 20361   | 90956   | 184179  | 310621  | 457915  |
| 2,3-Diphosphoglyceric acid         | 1138    | 1946    | 1410    | 3425    | 4594    | 4615    | 4503    |
| 2-Hydroxy-2-methylbutanedioic acid | 27497   | 11296   | 9465    | 10792   | 8794    | 11551   | 26262   |
| 2-Isopropylmalic acid              | 107808  | 99765   | 69185   | 57203   | 69007   | 90362   | 121285  |
| 2-oxo-4-methylthiobutanoate        | 1529    | 2706    | 1669    | 1315    | 1838    | 2526    | 4041    |
| 3-phosphoglycerate                 | 8748    | 7207    | 8011    | 7776    | 8566    | 10643   | 13958   |
| 5-phosphoribosyl 1-pyrophosphate   | 4206    | 6192    | 4688    | 7115    | 14351   | 23224   | 19086   |
| 6-phospho-D-gluconate              | 7609    | 9381    | 6066    | 1988    | 2253    | 4818    | 5495    |
| acetyl-CoA-nega                    | 2677    | 1934    | 1613    | 2793    | 1745    | 3918    | 4522    |
| acetylphosphate                    | 5912    | 4559    | 5481    | 9143    | 10439   | 16092   | 39324   |
| aconitate                          | 1780    | 1626    | 1276    | 1596    | 2110    | 1395    | 2342    |
| adenosine 5'-phosphosulfate        | 590     | 228     | 752     | 700     | 447     | 775     | 1250    |
| ADP-nega                           | 504     | 1143    | 551     | 530     | 1226    | 870     | 1846    |
| a-ketoglutarate                    | 6644    | 5521    | 5753    | 8181    | 8613    | 8300    | 11607   |
| alanine-CBZ                        | 70246   | 72027   | 182596  | 214822  | 207190  | 227268  | 318018  |
| alanine-CBZ-C13N15-IS              | 247185  | 292357  | 356537  | 363726  | 414073  | 413472  | 349277  |
| AICAR                              | 100     | 100     | 178     | 945     | 2013    | 1671    | 1931    |
| arginine-CBZ                       | 1904    | 2639    | 2969    | 4293    | 7085    | 9282    | 12524   |
| Ascorbic acid                      | 217     | 100     | 103     | 9592    | 9416    | 11978   | 18716   |
| asparagine-CBZ                     | 52617   | 55749   | 90644   | 87513   | 131223  | 169441  | 209675  |
| Aspartate-(U-13C/15N)-(neg)        | 5044    | 3681    | 5076    | 4917    | 5118    | 4237    | 5457    |
| aspartate-CBZ                      | 41091   | 86066   | 173758  | 156753  | 271640  | 347967  | 385307  |
| ATP-nega                           | 21797   | 29192   | 27593   | 33601   | 25308   | 40070   | 59939   |
| carbamoyl-phosphate                | 129     | 100     | 100     | 148     | 154     | 474     | 1169    |
| citrate                            | 4060    | 3840    | 4245    | 3124    | 3219    | 2786    | 2949    |
| citrate/isocitrate                 | 31199   | 29329   | 27893   | 23896   | 17426   | 18399   | 20606   |
| citrulline-CBZ                     | 9062    | 11098   | 16553   | 18468   | 23767   | 23453   | 27374   |
| CTP/UTP-nega-IS                    | 14393   | 22673   | 21483   | 19880   | 24148   | 22226   | 25387   |
| CTP-nega                           | 6150    | 12890   | 7463    | 5452    | 8628    | 11780   | 17215   |
| dATP-nega                          | 1346    | 1954    | 1714    | 7407    | 7030    | 8921    | 17755   |
| dCTP-nega                          | 1479    | 2009    | 1126    | 1883    | 2391    | 4675    | 21034   |
| D-glucono-δ-lactone-6-phosphate    | 423     | 356     | 918     | 478     | 708     | 609     | 676     |
| D-glyceraldehyde-3-phosphate       | 5445    | 5978    | 5823    | 6145    | 6749    | 8452    | 10882   |
| dihydroorotate                     | 1106    | 667     | 798     | 1369    | 1763    | 2135    | 801     |
| dihydroxy-acetone phosphate        | 6548    | 5871    | 7348    | 6915    | 7462    | 9024    | 12378   |
| D-sedoheptulose-7-phosphate        | 4843    | 5290    | 4102    | 2090    | 2310    | 4954    | 4668    |
| dTTP-nega                          | 3057    | 4259    | 692     | 306     | 22.66   | 129.61  | 76.78   |
| dUMP-nega                          | 100     | 3169    | 32765   | 18818   | 12149   | 28106   | 33384   |
| dUTP-nega                          | 100     | 143     | 124     | 100     | 290     | 464     | 2012    |
| fructose-1,6-bisphosphate          | 9015    | 12396   | 7285    | 11519   | 7903    | 12578   | 11627   |
| fructose-6-phosphate               | 1629    | 1493    | 802     | 1704    | 1663    | 2051    | 1522    |
| geranyl-PP                         | 1726    | 1636    | 2275    | 2233    | 2591    | 1976    | 1998    |
| glucose-1-phosphate                | 714     | 995     | 1143    | 1264    | 420     | 1353    | 1325    |
| glutamate-CBZ                      | 2449306 | 3813456 | 5078532 | 5569617 | 6819740 | 7895786 | 8569264 |
| glutamate-CBZ-C13N15-IS            | 117759  | 135121  | 157340  | 135296  | 157987  | 135841  | 90555   |
| glutamine-CBZ                      | 200712  | 215923  | 331052  | 326420  | 492914  | 578456  | 645501  |
| glutathione disulfide-nega         | 26035   | 31375   | 30392   | 23005   | 33256   | 37672   | 41898   |
| glutathione-nega                   | 40462   | 38455   | 42084   | 56835   | 63595   | 91322   | 110039  |
| glycine-CBZ                        | 499572  | 537733  | 573402  | 559274  | 524825  | 531526  | 462424  |
| GTP-nega                           | 12575   | 17512   | 20722   | 14736   | 20194   | 22715   | 29720   |

|                               |         |         |         |         |         |         |         |
|-------------------------------|---------|---------|---------|---------|---------|---------|---------|
| hexose-phosphate              | 11657   | 14412   | 10049   | 11050   | 12348   | 12265   | 15844   |
| histidine-CBZ                 | 5680    | 4215    | 6962    | 3790    | 4251    | 5008    | 8995    |
| homocysteine-MMTS             | 12096   | 8172    | 7217    | 13756   | 14821   | 22860   | 46307   |
| Indoleacrylic acid            | 2789    | 1411    | 2037    | 2459    | 2976    | 2536    | 2450    |
| leucine/isoleucine-CBZ        | 30127   | 30100   | 57542   | 54905   | 54228   | 51667   | 61076   |
| lysine-CBZ                    | 48439   | 76735   | 214919  | 185422  | 268070  | 462752  | 728998  |
| malate                        | 23767   | 26915   | 29027   | 30491   | 30584   | 34269   | 48412   |
| methionine-CBZ                | 5561926 | 5791986 | 6303634 | 5973005 | 6191949 | 6118010 | 5544457 |
| NAD+_nega                     | 30086   | 27760   | 27544   | 32091   | 39699   | 49763   | 68291   |
| NADP+_nega                    | 5219    | 8787    | 5885    | 4030    | 6511    | 8529    | 10398   |
| NADPH_nega                    | 3336    | 4032    | 3550    | 3666    | 2462    | 5929    | 8166    |
| N-Carbamoyl-L-aspartate       | 37419   | 32062   | 24179   | 72643   | 35926   | 20270   | 11951   |
| ornithine-CBZ                 | 7054    | 9766    | 18734   | 18617   | 28187   | 26739   | 33501   |
| orotate                       | 15671   | 8365    | 7016    | 19643   | 23115   | 26033   | 29848   |
| phenylalanine-CBZ             | 260     | 185     | 3010    | 2428    | 3303    | 4430    | 5176    |
| phenylpyruvate                | 954     | 1094    | 902     | 2416    | 2742    | 5358    | 6313    |
| phosphoenolpyruvate           | 675     | 906     | 548     | 1686    | 2329    | 2118    | 4451    |
| p-hydroxybenzoate             | 771     | 317     | 578     | 604     | 923     | 1758    | 2425    |
| prephenate                    | 215     | 256     | 2422    | 2892    | 2762    | 5839    | 7633    |
| proline-CBZ                   | 34126   | 35718   | 29751   | 38818   | 44771   | 63771   | 97382   |
| pyruvate                      | 384     | 244     | 687     | 3662    | 3808    | 3646    | 5447    |
| ribose-phosphate              | 8262    | 11831   | 10716   | 6966    | 8267    | 12345   | 17662   |
| S-adenosyl-L-methionine       | 3539    | 3893    | 2059    | 3301    | 3814    | 3607    | 2936    |
| S-adenosyl-L-methionine MMTS  | 4919    | 1955    | 1881    | 2248    | 2660    | 4658    | 4967    |
| serine-CBZ                    | 19150   | 11421   | 7891    | 5814    | 10487   | 11881   | 12504   |
| shikimate-3-phosphate         | 587     | 572     | 926     | 795     | 734     | 1926    | 870     |
| sn-glycerol-3-phosphate       | 1374    | 1527    | 1400    | 2227    | 1537    | 3220    | 5349    |
| S-ribosyl-L-homocysteine-nega | 206     | 160     | 164     | 455     | 326     | 535     | 1629    |
| succinate C12                 | 1346    | 411     | 585     | 883     | 535     | 491     | 528     |
| threonine-CBZ                 | 33421   | 34341   | 65031   | 66969   | 79317   | 101084  | 126608  |
| threonine-CBZ-C13             | 7690    | 5523    | 8338    | 7508    | 7303    | 7411    | 8325    |
| trptophan-CBZ                 | 3558    | 2026    | 11427   | 11939   | 11787   | 14368   | 15840   |
| tyrosine-CBZ                  | 3296    | 2751    | 24132   | 31270   | 30362   | 39833   | 53540   |
| UDP-D-glucose                 | 197234  | 189524  | 161203  | 123185  | 303745  | 339516  | 342343  |
| UDP-D-glucuronate             | 44656   | 39949   | 51373   | 36591   | 47888   | 56595   | 67169   |
| UDP-N-acetyl-glucosamine      | 32694   | 38206   | 27749   | 40593   | 61929   | 64886   | 76701   |
| UTP-nega                      | 13342   | 20904   | 18413   | 14605   | 29329   | 44777   | 73218   |
| valine-CBZ                    | 29385   | 26244   | 92950   | 81474   | 55325   | 73581   | 145001  |
| xanthosine                    | 2070    | 1498    | 1192    | 2000    | 3895    | 3764    | 2732    |

**Trimethoprim (4 µg/ml) + 0.3 mM gly + ino + met + thy replicate 1 raw data**

| Time (min)                         | 0       | 1       | 5       | 15      | 30      | 60      | 120     |
|------------------------------------|---------|---------|---------|---------|---------|---------|---------|
| Optical density                    | 0.450   | 0.450   | 0.484   | 0.518   | 0.587   | 0.724   | 0.998   |
| 1,3-diphosphateglycerate           | 601     | 100     | 109     | 100     | 187     | 495     | 658     |
| 2,3-dihydroxybenzoate              | 1211    | 912     | 19851   | 95674   | 224888  | 361702  | 530192  |
| 2,3-Diphosphoglyceric acid         | 2715    | 2331    | 1671    | 1131    | 3894    | 4567    | 4808    |
| 2-Hydroxy-2-methylbutanedioic acid | 3095    | 2170    | 670     | 395     | 1833    | 2363    | 4525    |
| 2-Isopropylmalic acid              | 128054  | 87706   | 44605   | 23651   | 63070   | 82445   | 82194   |
| 2-oxo-4-methylthiobutanoate        | 2321    | 2968    | 2542    | 2921    | 3227    | 6503    | 5099    |
| 3-phosphoglycerate                 | 4830    | 5294    | 6102    | 4658    | 5622    | 7659    | 10760   |
| 5-phosphoribosyl 1-pyrophosphate   | 4825    | 5744    | 1997    | 353     | 8682    | 23563   | 20106   |
| 6-phospho-D-gluconate              | 11848   | 6862    | 7152    | 3374    | 5580    | 8114    | 5882    |
| acetyl-CoA-nega                    | 4836    | 4179    | 2049    | 2177    | 4920    | 5619    | 7720    |
| acetylphosphate                    | 14784   | 10100   | 12148   | 14112   | 21917   | 39498   | 74650   |
| aconitate                          | 2288    | 1481    | 1421    | 1879    | 1978    | 1976    | 1761    |
| adenosine 5'-phosphosulfate        | 958     | 777     | 170     | 934     | 1594    | 544     | 343     |
| ADP-D-glucose                      | 373     | 337     | 100     | 100     | 125     | 100     | 196     |
| ADP-nega                           | 1666    | 1924    | 818     | 1635    | 1078    | 967     | 1829    |
| a-ketoglutarate                    | 7748    | 6827    | 7697    | 11189   | 11419   | 11865   | 14389   |
| alanine-CBZ                        | 156624  | 144834  | 191673  | 323934  | 243282  | 215816  | 307651  |
| alanine-CBZ-C13N15-IS              | 432149  | 518106  | 378023  | 385181  | 397760  | 353401  | 393308  |
| AICAR                              | 100     | 340     | 3949    | 10377   | 18694   | 36458   | 34522   |
| arginine-CBZ                       | 4414    | 6405    | 5040    | 4967    | 7219    | 7871    | 9291    |
| Ascorbic acid                      | 369     | 144     | 100     | 7368    | 12484   | 10738   | 32158   |
| asparagine-CBZ                     | 66325   | 93528   | 87010   | 104703  | 121659  | 132266  | 194597  |
| Aspartate-(U-13C/15N)-(neg)        | 8302    | 7586    | 8650    | 5139    | 7263    | 7569    | 7074    |
| aspartate-CBZ                      | 133714  | 245036  | 250641  | 268080  | 353640  | 387277  | 519230  |
| ATP-nega                           | 16323   | 14418   | 5679    | 4479    | 5674    | 14233   | 14532   |
| carbamoyl-phosphate                | 317     | 212     | 276     | 100     | 1144    | 3620    | 2782    |
| Citraconic acid                    | 1766    | 2121    | 2706    | 1782    | 3105    | 3052    | 3850    |
| citrate                            | 2607    | 4931    | 2085    | 682     | 1303    | 1291    | 2072    |
| citrate/isocitrate                 | 20083   | 32351   | 13139   | 4241    | 9961    | 13232   | 15877   |
| citrulline-CBZ                     | 9699    | 13687   | 15130   | 17754   | 22075   | 18174   | 21678   |
| CTP/UTP-nega-IS                    | 10197   | 8636    | 3780    | 2461    | 4927    | 7622    | 8127    |
| CTP-nega                           | 4996    | 4318    | 1719    | 764     | 1014    | 4451    | 5675    |
| dATP-nega                          | 1066    | 1392    | 478     | 591     | 123     | 593     | 1479    |
| dCTP-nega                          | 871     | 962     | 299     | 328     | 725     | 728     | 896     |
| dGDP                               | 2313    | 1794    | 1362    | 1019    | 1610    | 2367    | 1725    |
| D-glucono-δ-lactone-6-phosphate    | 559     | 631     | 1425    | 702     | 845     | 874     | 541     |
| D-glyceraldehyde-3-phosphate       | 5339    | 6119    | 5911    | 5177    | 7286    | 9174    | 12605   |
| dGTP-nega                          | 17491   | 13758   | 6933    | 3853    | 5488    | 15729   | 12735   |
| dihydroorotate                     | 1168    | 513     | 787     | 1791    | 1498    | 908     | 430     |
| dihydroxy-acetone phosphate        | 6526    | 4907    | 6370    | 5976    | 7047    | 10598   | 13186   |
| D-sedoheptulose-7-phosphate        | 8003    | 5441    | 6801    | 3658    | 7221    | 10857   | 7958    |
| dTTP-nega                          | 1982    | 2138    | 42      | 120     | 284     | 1359    | 1788    |
| dUMP-nega                          | 100     | 1794    | 20755   | 28236   | 23034   | 22662   | 15463   |
| fructose-1,6-bisphosphate          | 32089   | 42935   | 33106   | 26208   | 32735   | 44750   | 52584   |
| fructose-6-phosphate               | 2276    | 1703    | 1692    | 2172    | 2235    | 3113    | 2800    |
| geranyl-PP                         | 1866    | 2301    | 1720    | 1638    | 1995    | 1880    | 1595    |
| glucose-1-phosphate                | 1833    | 900     | 978     | 754     | 2835    | 1562    | 1052    |
| glucose-6-phosphate                | 5250    | 4342    | 3589    | 3484    | 4087    | 6135    | 4774    |
| glutamate-CBZ                      | 4330008 | 5599114 | 5171031 | 6706337 | 6990089 | 6626361 | 8696938 |
| glutamine-CBZ                      | 282948  | 393579  | 362129  | 428465  | 474606  | 508583  | 698229  |
| glutathione disulfide-nega         | 4436    | 6253    | 5505    | 5753    | 10307   | 13848   | 15801   |

|                               |         |         |         |         |         |         |         |
|-------------------------------|---------|---------|---------|---------|---------|---------|---------|
| glutathione-nega              | 92170   | 76789   | 69548   | 60973   | 93134   | 125493  | 144672  |
| glycerate                     | 3441    | 3197    | 2722    | 974     | 2486    | 3202    | 2463    |
| glycine-CBZ                   | 494729  | 565701  | 521903  | 467942  | 464341  | 487564  | 384692  |
| GTP-nega                      | 6342    | 5364    | 14      | 71      | 2451    | 5377    | 6355    |
| hexose-phosphate              | 17409   | 13734   | 17147   | 12590   | 18769   | 20420   | 16642   |
| histidine-CBZ                 | 8649    | 9701    | 10202   | 6656    | 7283    | 7098    | 7700    |
| homocysteine-MMTS             | 17821   | 16480   | 11421   | 21314   | 32776   | 41042   | 68720   |
| hypoxanthine                  | 3576    | 2305    | 2400    | 1218    | 1077    | 883     | 1259    |
| Indoleacrylic acid            | 3231    | 4377    | 1952    | 3914    | 3827    | 3058    | 2178    |
| leucine/isoleucine-CBZ        | 70653   | 42151   | 47904   | 57415   | 46327   | 43727   | 45128   |
| lysine-CBZ                    | 131818  | 208751  | 219780  | 245040  | 237597  | 309305  | 663705  |
| malate                        | 40107   | 36802   | 24407   | 15661   | 34256   | 44508   | 47042   |
| Maleic acid                   | 2615    | 2606    | 2731    | 2981    | 1918    | 1664    | 2773    |
| methionine-CBZ                | 5272089 | 5761209 | 5499604 | 5191885 | 5130584 | 4928845 | 4966273 |
| Methylmalonic acid            | 75875   | 33231   | 19437   | 24017   | 42027   | 27348   | 29281   |
| NAD+_nega                     | 25541   | 29854   | 30141   | 27105   | 41263   | 59957   | 62472   |
| NADP+_nega                    | 12113   | 13266   | 11268   | 9215    | 12795   | 21205   | 18353   |
| NADPH_nega                    | 3847    | 2776    | 1797    | 1469    | 2534    | 8570    | 4147    |
| N-Carbamoyl-L-aspartate       | 35142   | 28331   | 29417   | 98819   | 43065   | 24721   | 15133   |
| ornithine-CBZ                 | 10983   | 18931   | 19430   | 23044   | 20145   | 20441   | 44592   |
| orotate                       | 17789   | 6419    | 6036    | 8478    | 15341   | 22744   | 29055   |
| phenylalanine-CBZ             | 1568    | 106     | 1701    | 2265    | 2895    | 4627    | 4782    |
| phenylpyruvate                | 1672    | 405     | 478     | 2250    | 4324    | 8163    | 13066   |
| phosphoenolpyruvate           | 485     | 760     | 1279    | 2084    | 2753    | 3163    | 5504    |
| p-hydroxybenzoate             | 1202    | 648     | 886     | 1032    | 1414    | 2136    | 2583    |
| prephenate                    | 171     | 100     | 430     | 1342    | 2147    | 3625    | 6173    |
| proline-CBZ                   | 56995   | 43525   | 48789   | 50527   | 52657   | 122422  | 115439  |
| pyruvate                      | 1113    | 597     | 825     | 4976    | 7320    | 5822    | 10445   |
| quinolinate                   | 434     | 334     | 229     | 100     | 100     | 122     | 192     |
| ribose-phosphate              | 2758    | 2184    | 2732    | 2132    | 2305    | 3826    | 4814    |
| S-adenosyl-L-methionine       | 857     | 230     | 229     | 1351    | 429     | 1968    | 861     |
| S-adenosyl-L-methionine MMTS  | 1139    | 193     | 471     | 943     | 306     | 1345    | 658     |
| serine-CBZ                    | 20716   | 21405   | 11446   | 7354    | 8564    | 9576    | 12530   |
| shikimate-3-phosphate         | 929     | 1230    | 986     | 338     | 530     | 609     | 1104    |
| sn-glycerol-3-phosphate       | 2837    | 1513    | 1469    | 1349    | 1865    | 3352    | 3034    |
| S-ribosyl-L-homocysteine-nega | 620     | 733     | 349     | 1015    | 1614    | 1935    | 2567    |
| succinate C12                 | 2780    | 1124    | 570     | 447     | 1200    | 316     | 611     |
| threonine-CBZ                 | 70588   | 73130   | 80836   | 98355   | 90489   | 117851  | 123041  |
| threonine-CBZ-C13             | 6822    | 9576    | 7979    | 9039    | 7426    | 7136    | 8497    |
| trehalose 6-Phosphate         | 100     | 100     | 100     | 100     | 153     | 241     | 387     |
| trptophan-CBZ                 | 3958    | 2739    | 7929    | 10280   | 10690   | 11707   | 13540   |
| tyrosine-CBZ                  | 3725    | 3157    | 13827   | 22212   | 24974   | 39015   | 45121   |
| UDP-D-glucose                 | 191352  | 195073  | 158897  | 129872  | 352335  | 439199  | 382588  |
| UDP-D-glucuronate             | 47006   | 59421   | 48703   | 36807   | 51023   | 75116   | 93010   |
| UDP-N-acetyl-glucosamine      | 36557   | 40975   | 31059   | 48041   | 71109   | 87779   | 76745   |
| UDP-nega                      | 779     | 450     | 408     | 337     | 607     | 832     | 1837    |
| UTP-nega                      | 8449    | 10645   | 3947    | 1921    | 6763    | 16586   | 17787   |
| valine-CBZ                    | 59515   | 45583   | 94810   | 160586  | 59160   | 85132   | 194158  |
| xanthosine                    | 1964    | 1261    | 1106    | 3083    | 4039    | 4559    | 4077    |

**Trimethoprim (4 µg/ml) + 0.3 mM gly + ino + met + thy replicate 2 raw data**

| Time (min)                         | 0       | 1       | 5       | 15      | 30      | 60      | 120     |
|------------------------------------|---------|---------|---------|---------|---------|---------|---------|
| Optical density                    | 0.450   | 0.450   | 0.484   | 0.518   | 0.587   | 0.724   | 0.998   |
| 1,3-diphosphateglycerate           | 179     | 363     | 224     | 333     | 943     | 1308    | 2209    |
| 2,3-dihydroxybenzoate              | 1404    | 1398    | 21259   | 161192  | 241806  | 400092  | 624207  |
| 2,3-Diphosphoglyceric acid         | 1257    | 1634    | 2554    | 6503    | 6705    | 8616    | 9984    |
| 2-Hydroxy-2-methylbutanedioic acid | 3095    | 2253    | 5189    | 2028    | 6166    | 5688    | 5688    |
| 2-Isopropylmalic acid              | 128998  | 100770  | 101369  | 70307   | 119894  | 129763  | 143225  |
| 2-oxo-4-methylthiobutanoate        | 2793    | 3008    | 2438    | 2255    | 2485    | 5319    | 4239    |
| 3-phosphoglycerate                 | 5082    | 3151    | 4942    | 3499    | 4800    | 7500    | 11975   |
| 5-phosphoribosyl 1-pyrophosphate   | 4961    | 7086    | 7818    | 7913    | 40706   | 37544   | 39618   |
| 6-phospho-D-gluconate              | 14083   | 9533    | 6117    | 5073    | 5369    | 8740    | 13781   |
| acetyl-CoA-nega                    | 2683    | 5270    | 2969    | 5115    | 5963    | 4913    | 8750    |
| acetylphosphate                    | 9631    | 6127    | 8729    | 13645   | 18218   | 28925   | 65868   |
| aconitate                          | 2984    | 2580    | 5987    | 3684    | 2385    | 2223    | 2337    |
| adenosine 5'-phosphosulfate        | 765     | 625     | 655     | 794     | 626     | 1356    | 1808    |
| ADP-D-glucose                      | 586     | 100     | 100     | 134     | 100     | 100     | 187     |
| ADP-nega                           | 997     | 2225    | 1582    | 2307    | 1504    | 1873    | 3884    |
| a-ketoglutarate                    | 8460    | 9205    | 13088   | 13333   | 12701   | 15145   | 15255   |
| alanine-CBZ                        | 145949  | 109372  | 200219  | 258329  | 204190  | 222928  | 305269  |
| alanine-CBZ-C13N15-IS              | 532495  | 410137  | 380877  | 338642  | 346163  | 352457  | 318883  |
| AICAR                              | 131     | 646     | 3711    | 11580   | 23773   | 33146   | 42514   |
| arginine-CBZ                       | 4158    | 5936    | 6794    | 3363    | 7540    | 8832    | 11742   |
| Ascorbic acid                      | 146     | 100     | 100     | 9016    | 16704   | 16012   | 27833   |
| asparagine-CBZ                     | 98315   | 57929   | 64816   | 79691   | 90575   | 111198  | 132804  |
| Aspartate-(U-13C/15N)-(neg)        | 8249    | 8119    | 7377    | 6817    | 8133    | 7765    | 9263    |
| aspartate-CBZ                      | 149365  | 145450  | 198672  | 202189  | 335580  | 358573  | 416895  |
| ATP-nega                           | 18733   | 24014   | 24079   | 42231   | 22011   | 32341   | 47659   |
| carbamoyl-phosphate                | 239     | 304     | 125     | 100     | 1359    | 2515    | 4250    |
| Citraconic acid                    | 2543    | 2016    | 2984    | 2381    | 2438    | 3214    | 3447    |
| citrate                            | 7918    | 9854    | 16277   | 8319    | 5724    | 4415    | 4383    |
| citrate/isocitrate                 | 62298   | 87952   | 153099  | 83075   | 65723   | 47992   | 52548   |
| citulline-CBZ                      | 13921   | 11505   | 11525   | 17873   | 17757   | 18929   | 20721   |
| CTP/UTP-nega-IS                    | 12696   | 19571   | 20784   | 20912   | 21352   | 23297   | 23516   |
| CTP-nega                           | 7420    | 7818    | 9128    | 5167    | 7512    | 12025   | 16474   |
| dATP-nega                          | 827     | 1295    | 1869    | 3962    | 1335    | 2274    | 3459    |
| dCTP-nega                          | 1122    | 1878    | 1599    | 1987    | 1180    | 2523    | 1859    |
| dGDP                               | 1727    | 1339    | 835     | 2508    | 2258    | 2882    | 3324    |
| D-glucono-δ-lactone-6-phosphate    | 635     | 606     | 313     | 513     | 748     | 578     | 380     |
| D-glyceraldehyde-3-phosphate       | 5153    | 5342    | 5380    | 7495    | 7624    | 9137    | 13621   |
| dGTP-nega                          | 18674   | 24024   | 24310   | 42747   | 20804   | 36344   | 52173   |
| dihydroorotate                     | 1050    | 1134    | 263     | 1584    | 2064    | 1009    | 1125    |
| dihydroxy-acetone phosphate        | 4720    | 6326    | 4408    | 7406    | 8318    | 10870   | 13093   |
| D-sedoheptulose-7-phosphate        | 7283    | 7005    | 5037    | 3975    | 5936    | 7156    | 8783    |
| dTTP-nega                          | 3553    | 2231    | 1982    | 1768    | 1295    | 2771    | 6083    |
| dUMP-nega                          | 100     | 2380    | 18097   | 34341   | 28002   | 27874   | 24100   |
| fructose-1,6-bisphosphate          | 39537   | 55499   | 49830   | 58625   | 51477   | 60209   | 71571   |
| fructose-6-phosphate               | 1475    | 2418    | 1138    | 2150    | 1999    | 2727    | 1318    |
| geranyl-PP                         | 1501    | 1548    | 1571    | 1763    | 1549    | 1605    | 1809    |
| glucose-1-phosphate                | 908     | 1826    | 1199    | 1280    | 1044    | 1412    | 1269    |
| glucose-6-phosphate                | 3940    | 3658    | 3666    | 5250    | 5531    | 3965    | 4843    |
| glutamate-CBZ                      | 5009351 | 4787331 | 5368858 | 6576927 | 6493827 | 7600819 | 8029287 |
| glutamine-CBZ                      | 348229  | 296406  | 318996  | 375844  | 484471  | 522295  | 592400  |
| glutathione disulfide-nega         | 27008   | 36342   | 34609   | 29426   | 33739   | 44602   | 36241   |

|                               |         |         |         |         |         |         |         |
|-------------------------------|---------|---------|---------|---------|---------|---------|---------|
| glutathione-nega              | 46598   | 51814   | 52136   | 57469   | 79932   | 94960   | 148490  |
| glycerate                     | 3733    | 4741    | 7296    | 3729    | 3636    | 3901    | 4507    |
| glycine-CBZ                   | 467445  | 497446  | 469067  | 453036  | 428002  | 398191  | 355062  |
| GTP-nega                      | 9265    | 11660   | 15855   | 20725   | 18402   | 21687   | 27143   |
| hexose-phosphate              | 15657   | 13362   | 10590   | 16588   | 15889   | 14482   | 20739   |
| histidine-CBZ                 | 7591    | 8725    | 8291    | 7340    | 8307    | 6667    | 9026    |
| homocysteine-MMTS             | 15114   | 12944   | 16789   | 23068   | 33787   | 41991   | 78282   |
| hypoxanthine                  | 4979    | 3453    | 4071    | 3661    | 1336    | 1448    | 1048    |
| Indoleacrylic acid            | 2969    | 2390    | 1922    | 3001    | 2169    | 2243    | 3435    |
| leucine/isoleucine-CBZ        | 36927   | 34246   | 57011   | 45235   | 36233   | 40557   | 48546   |
| lysine-CBZ                    | 161568  | 132577  | 206538  | 185594  | 229222  | 279436  | 424090  |
| malate                        | 43904   | 42176   | 63369   | 54726   | 78561   | 79907   | 81589   |
| Maleic acid                   | 1871    | 3740    | 2717    | 2602    | 3018    | 2895    | 2059    |
| methionine-CBZ                | 5328656 | 5330501 | 4936809 | 4487037 | 4537865 | 4891146 | 4969040 |
| Methylmalonic acid            | 39803   | 39655   | 292406  | 44393   | 44635   | 35878   | 36332   |
| NAD+_nega                     | 25401   | 32213   | 31932   | 38288   | 52769   | 61496   | 77710   |
| NADP+_nega                    | 9666    | 14837   | 12545   | 13529   | 12536   | 16993   | 28270   |
| NADPH_nega                    | 2570    | 4694    | 4228    | 6189    | 4484    | 7504    | 8274    |
| N-Carbamoyl-L-aspartate       | 38704   | 36437   | 28637   | 121354  | 48769   | 31529   | 18642   |
| ornithine-CBZ                 | 17341   | 12853   | 11561   | 18411   | 17260   | 24048   | 31199   |
| orotate                       | 21367   | 8267    | 16213   | 26601   | 22734   | 31620   | 37416   |
| phenylalanine-CBZ             | 520     | 100     | 2553    | 2036    | 2313    | 2598    | 4477    |
| phenylpyruvate                | 1033    | 665     | 847     | 2908    | 3086    | 5912    | 13051   |
| phosphoenolpyruvate           | 611     | 1446    | 1679    | 3500    | 3340    | 5427    | 6108    |
| p-hydroxybenzoate             | 1152    | 459     | 1602    | 1323    | 2146    | 2380    | 3425    |
| prephenate                    | 190     | 100     | 400     | 1934    | 2284    | 3711    | 7609    |
| proline-CBZ                   | 57153   | 43920   | 30502   | 50056   | 51095   | 88842   | 163675  |
| pyruvate                      | 899     | 590     | 1363    | 4692    | 7630    | 7448    | 11124   |
| quinolinate                   | 619     | 1083    | 1483    | 1938    | 1270    | 1368    | 860     |
| ribose-phosphate              | 1763    | 1652    | 1433    | 2345    | 1695    | 2410    | 4739    |
| S-adenosyl-L-methionine       | 343     | 945     | 323     | 100     | 125     | 100     | 821     |
| S-adenosyl-L-methionine MMTS  | 100     | 100     | 247     | 459     | 100     | 277     | 512     |
| serine-CBZ                    | 27989   | 10900   | 4944    | 5902    | 8484    | 7037    | 7153    |
| shikimate-3-phosphate         | 1015    | 460     | 1089    | 404     | 1149    | 873     | 386     |
| sn-glycerol-3-phosphate       | 2186    | 1593    | 2564    | 1776    | 1693    | 2736    | 3577    |
| S-ribosyl-L-homocysteine-nega | 796     | 704     | 758     | 572     | 1374    | 1695    | 2679    |
| succinate C12                 | 1121    | 1047    | 9653    | 1345    | 1314    | 800     | 902     |
| threonine-CBZ                 | 74969   | 41446   | 56677   | 71874   | 68082   | 82853   | 108887  |
| threonine-CBZ-C13             | 10078   | 7130    | 6079    | 5958    | 5966    | 5278    | 5931    |
| trehalose 6-Phosphate         | 100     | 223     | 100     | 100     | 172     | 364     | 834     |
| trptophan-CBZ                 | 3266    | 1535    | 5328    | 8254    | 8683    | 8554    | 13778   |
| tyrosine-CBZ                  | 2780    | 2869    | 12475   | 25968   | 27986   | 36412   | 50905   |
| UDP-D-glucose                 | 185859  | 195940  | 168906  | 148449  | 355583  | 437748  | 486030  |
| UDP-D-glucuronate             | 45765   | 54863   | 67597   | 62823   | 58827   | 98506   | 125955  |
| UDP-N-acetyl-glucosamine      | 39824   | 45010   | 34205   | 55841   | 67078   | 81373   | 93287   |
| UDP-nega                      | 671     | 765     | 687     | 889     | 1236    | 673     | 3322    |
| UTP-nega                      | 13927   | 15124   | 18085   | 17301   | 29709   | 46368   | 59122   |
| valine-CBZ                    | 50327   | 27918   | 82899   | 149885  | 54692   | 80879   | 180166  |
| xanthosine                    | 1261    | 1423    | 3148    | 2775    | 3291    | 3937    | 4199    |
